# Supplementary material
Source: publisher figshare collection journal article supplement (https://acs.figshare.com/ndownloader/files/18028604)
Supplement: Supplementary file 1 [file 18028604]

## Sheet: Total_Phospho_Diff_>35
												2	5	8	3	6	9	4	7	10	Average						Difference (Phospho-Whole)
ID	pSite	ID_pSite	Cyt_P1	Cyt_P2	Cyt_P3	Org_P1	Org_P2	Org_P3	Nuc_P1	Nuc_P2	Nuc_P3	Cyt_W1	Cyt_W2	Cyt_W3	Org_W1	Org_W2	Org_W3	Nuc_W1	Nuc_W2	Nuc_W3	Cyt_P1	Org_P1	Nuc_P1	Cyt_W1	Org_W1	Nuc_W1	Cyt	Org	Nuc	MAX
AT2B1_HUMAN	S1193	AT2B1_HUMAN;S1193	0.00566573	0.0213918	0.0191911	0.993432	0.975541	0.973038	0.000902489	0.00306677	0.00777132	0.104	0.480182	0.110748	0.0247592	0.0396363	0.0418546	0.87124	0.480182	0.847398	0.0154162	0.98067	0.00391353	0.231643	0.0354167	0.73294	0.216227	0.945254	0.729027	0.945254
LMNB1_HUMAN	T20,S23	LMNB1_HUMAN;T20,S23	0.418047	0.42497	0.429093	0.501602	0.472491	0.49938	0.0803514	0.102539	0.0715272	0.0319552	0.0363538	0.0310553	0.0669357	0.0644774	0.0450448	0.901109	0.899169	0.9239	0.424036	0.491158	0.084806	0.0331214	0.0588193	0.908059	0.390915	0.432338	0.823253	0.823253
LMNB2_HUMAN	T14,S17	LMNB2_HUMAN;T14,S17	0.135411	0.137789	0.113557	0.853281	0.840895	0.870653	0.0113076	0.0213158	0.0157905	0.0817858	0.104789	0.0815023	0.090339	0.0971748	0.0783739	0.827875	0.798036	0.840124	0.128919	0.854943	0.0161379	0.089359	0.0886293	0.822012	0.0395599	0.766314	0.805874	0.805874
NOLC1_HUMAN	T607,T610	NOLC1_HUMAN;T607,T610	0.887478	0.88443	0.876006	0.0976804	0.0901423	0.0949741	0.0148413	0.025428	0.02902	0.205708	0.314286	0.231727	0.415811	0.310981	0.364141	0.378481	0.374733	0.404132	0.882638	0.0942656	0.0230964	0.250573	0.363644	0.385782	0.632065	0.269379	0.362686	0.632065
DESP_HUMAN	S178	DESP_HUMAN;S178	0.379896	0.322276	0.222257	0.366092	0.368611	0.463864	0.254013	0.309113	0.313879	0.0532022	0.0297897	0.0396649	0.0459656	0.211054	0.0539679	0.900832	0.759157	0.906367	0.308143	0.399522	0.292335	0.0408856	0.103662	0.855452	0.267257	0.29586	0.563117	0.563117
SF3B1_HUMAN	T223,S229	SF3B1_HUMAN;T223,S229	0.00739118	0.00481962	0.00614682	0.0145859	0.00826047	0.00694307	0.978023	0.98692	0.98691	0.143358	0.106446	0.112259	0.434801	0.494842	0.438086	0.421841	0.398711	0.449655	0.00611921	0.0099298	0.983951	0.120688	0.45591	0.423403	0.114569	0.44598	0.560548	0.560548
SF3B1_HUMAN	T223,T227	SF3B1_HUMAN;T223,T227	0.00387586	0.00234606	0.00171857	0.0116542	0.0365681	0.0336403	0.98447	0.961086	0.964641	0.143358	0.106446	0.112259	0.434801	0.494842	0.438086	0.421841	0.398711	0.449655	0.00264683	0.0272875	0.970066	0.120688	0.45591	0.423403	0.118041	0.428622	0.546663	0.546663
CTND1_HUMAN	S920	CTND1_HUMAN;S920	0.512989	0.318703	0.52134	0.421474	0.340648	0.119951	0.0655372	0.340648	0.358709	0.0662212	0.0568083	0.0295549	0.882171	0.784743	0.812312	0.0516081	0.158449	0.158133	0.45101	0.294025	0.254965	0.0508615	0.826409	0.12273	0.400149	0.532384	0.132235	0.532384
MY18A_HUMAN	S140	MY18A_HUMAN;S140	0.317485	0.30576	0.272508	0.0186213	0.0173701	0.0135038	0.663894	0.67687	0.713988	0.652583	0.249731	0.333035	0.253669	0.623727	0.392444	0.0937487	0.126542	0.274521	0.298584	0.0164984	0.684917	0.411783	0.42328	0.164937	0.113198	0.406782	0.51998	0.51998
HS90B_HUMAN	S226	HS90B_HUMAN;S226	0.103697	0.290072	0.13714	0.282467	0.366882	0.298406	0.613836	0.343045	0.564455	0.677534	0.710178	0.699403	0.192318	0.156708	0.163438	0.130147	0.133114	0.137159	0.176969	0.315919	0.507112	0.695705	0.170822	0.133474	0.518735	0.145097	0.373638	0.518735
PDIA6_HUMAN	S428	PDIA6_HUMAN;S428	0.176693	0.155818	0.223641	0.299735	0.250589	0.171877	0.523572	0.593593	0.604482	0.18603	0.153446	0.20682	0.775942	0.735844	0.744041	0.038028	0.11071	0.0491385	0.185384	0.240734	0.573882	0.182099	0.751942	0.0659589	0.00328526	0.511209	0.507923	0.511209
CLCA_HUMAN	S105	CLCA_HUMAN;S105	0.908815	0.868721	0.92167	0.0693011	0.0947923	0.059277	0.0218837	0.0364868	0.0190529	0.434138	0.357271	0.450822	0.561223	0.626666	0.542333	0.00463835	0.0160628	0.00684531	0.899735	0.0744568	0.0258078	0.414077	0.576741	0.00918215	0.485658	0.502284	0.0166256	0.502284
NOP56_HUMAN	S569,S570	NOP56_HUMAN;S569,S570	0.100207	0.342445	0.357818	0.857013	0.251764	0.235916	0.0427802	0.405791	0.406266	0.114103	0.115042	0.0471083	0.126253	0.159806	0.112399	0.759643	0.725152	0.840492	0.266824	0.448231	0.284946	0.0920844	0.13282	0.775096	0.174739	0.315411	0.49015	0.49015
LMNA_HUMAN	S22	LMNA_HUMAN;S22	0.30806	0.339114	0.305636	0.407339	0.326105	0.329954	0.284601	0.33478	0.36441	0.0544207	0.0418619	0.0504892	0.123748	0.153096	0.126271	0.821831	0.805042	0.82324	0.317603	0.354466	0.327931	0.0489239	0.134372	0.816704	0.26868	0.220094	0.488774	0.488774
CTND1_HUMAN	S864	CTND1_HUMAN;S864	0.334589	0.222444	0.333333	0.332705	0.388778	0.333333	0.332705	0.388778	0.333333	0.0662212	0.0568083	0.0295549	0.882171	0.784743	0.812312	0.0516081	0.158449	0.158133	0.296789	0.351606	0.351606	0.0508615	0.826409	0.12273	0.245927	0.474803	0.228876	0.474803
FND3A_HUMAN	S203,S207,S213	FND3A_HUMAN;S203,S207,S213	0.380146	0.333333	0.333333	0.60992	0.333333	0.333333	0.00993345	0.333333	0.333333	0.0781096	0.0178924	0.147677	0.862671	0.95759	0.848658	0.0592191	0.024518	0.00366489	0.348938	0.425529	0.225533	0.0812265	0.88964	0.029134	0.267711	0.46411	0.196399	0.46411
DSRAD_HUMAN	S1064,T1066,Y1069,S1072	DSRAD_HUMAN;S1064,T1066,Y1069,S1072	0.660202	0.493133	0.419855	0.190022	0.185782	0.332656	0.149776	0.321085	0.247489	0.0859317	0.0293393	0.0872438	0.430375	0.0737746	0.260809	0.483693	0.896886	0.651947	0.524397	0.236153	0.23945	0.0675049	0.254986	0.677509	0.456892	0.0188329	0.438059	0.456892
MAP4_HUMAN	T571	MAP4_HUMAN;T571	0.36787	0.113935	0.651542	0.631607	0.885597	0.346127	0.000522893	0.000468126	0.00233144	0.821544	0.383945	0.910907	0.154149	0.256994	0.0848859	0.0243066	0.359061	0.00420746	0.377782	0.62111	0.00110749	0.705465	0.165343	0.129192	0.327683	0.455767	0.128084	0.455767
ANXA3_HUMAN	S129,T134,Y136	ANXA3_HUMAN;S129,T134,Y136	0.315141	0.312025	0.529735	0.677707	0.661561	0.391286	0.00715232	0.026414	0.0789791	0.731926	0.794521	0.733881	0.118022	0.165954	0.124225	0.150052	0.0395253	0.141895	0.385634	0.576851	0.0375151	0.753442	0.136067	0.110491	0.367809	0.440784	0.0729756	0.440784
IF4G1_HUMAN	S1231	IF4G1_HUMAN;S1231	0.609437	0.618418	0.42223	0.343773	0.333367	0.5008	0.04679	0.0482147	0.0769694	0.282461	0.29201	0.279901	0.264172	0.174942	0.215414	0.453367	0.533048	0.504685	0.550029	0.392647	0.0573247	0.284791	0.218176	0.497033	0.265238	0.174471	0.439709	0.439709
HNRPD_HUMAN	S82	HNRPD_HUMAN;S82	0.648221	0.480858	0.632857	0.224363	0.449253	0.183571	0.127416	0.0698891	0.183571	0.123328	0.206458	0.12144	0.763179	0.660113	0.717951	0.113493	0.133429	0.160609	0.587312	0.285729	0.126959	0.150409	0.713748	0.135844	0.436903	0.428018	0.00888478	0.436903
CDK13_HUMAN	S383	CDK13_HUMAN;S383	0.0878103	0.160105	0.175759	0.870229	0.772054	0.733735	0.0419603	0.0678408	0.0905065	0.508316	0.539048	0.523249	0.39469	0.338907	0.344521	0.0969937	0.122045	0.13223	0.141225	0.792006	0.0667692	0.523538	0.359372	0.11709	0.382313	0.432634	0.0503205	0.432634
NPM_HUMAN	S137	NPM_HUMAN;S137	0.68535	0.872248	0.654385	0.290199	0.102319	0.339501	0.0244512	0.0254327	0.00611335	0.298186	0.31517	0.313583	0.40803	0.384023	0.409325	0.293784	0.300808	0.277092	0.737328	0.244006	0.0186658	0.30898	0.400459	0.290561	0.428348	0.156453	0.271895	0.428348
PPBI_HUMAN	S111	PPBI_HUMAN;S111	0.00244653	0.00213536	0.0127614	0.425905	0.498923	0.323778	0.571649	0.498942	0.66346	0.0184622	0.0515326	0.0487435	0.857	0.769614	0.773793	0.124537	0.178853	0.177463	0.00578109	0.416202	0.578017	0.0395794	0.800136	0.160285	0.0337983	0.383934	0.417732	0.417732
ODPA_HUMAN	S291	ODPA_HUMAN;S291	0.0720061	0.0651379	0.0655841	0.439524	0.481749	0.49043	0.48847	0.453113	0.443986	0.118128	0.0730704	0.129167	0.793051	0.891968	0.854473	0.088821	0.0349613	0.0163607	0.067576	0.470568	0.461856	0.106789	0.846497	0.0467143	0.0392125	0.375929	0.415142	0.415142
MCM6_HUMAN	S762	MCM6_HUMAN;S762	0.562255	0.33133	0.24305	0.0898895	0.137496	0.219436	0.347856	0.531174	0.537514	0.744834	0.827404	0.788675	0.178653	0.0909082	0.134033	0.0765125	0.0816879	0.0772924	0.378878	0.148941	0.472181	0.786971	0.134531	0.0784976	0.408093	0.0144091	0.393684	0.408093
CDK13_HUMAN	S358,S360	CDK13_HUMAN;S358,S360	0.11859	0.129168	0.112745	0.791105	0.746642	0.764476	0.0903047	0.12419	0.122779	0.508316	0.539048	0.523249	0.39469	0.338907	0.344521	0.0969937	0.122045	0.13223	0.120168	0.767408	0.112425	0.523538	0.359372	0.11709	0.40337	0.408035	0.00466513	0.408035
MRP4_HUMAN	T646	MRP4_HUMAN;T646	0.00569545	0.00342017	0.0038574	0.987201	0.991622	0.984088	0.00710388	0.0049579	0.0120541	0.236032	0.0347844	0.0240028	0.34079	0.482608	0.915722	0.423178	0.482608	0.060275	0.00432434	0.987637	0.00803863	0.0982732	0.579707	0.32202	0.0939489	0.407931	0.313982	0.407931
RBM14_HUMAN	S582	RBM14_HUMAN;S582	0.0570244	0.0503036	0.0574054	0.397094	0.366348	0.332719	0.545882	0.583349	0.609876	0.437415	0.488509	0.445789	0.334058	0.283115	0.335155	0.228527	0.228376	0.219056	0.0549111	0.365387	0.579702	0.457237	0.317443	0.22532	0.402326	0.0479439	0.354382	0.402326
RBM14_HUMAN	T206	RBM14_HUMAN;T206	0.078185	0.0719241	0.0613261	0.300718	0.385986	0.396616	0.621097	0.54209	0.542057	0.437415	0.488509	0.445789	0.334058	0.283115	0.335155	0.228527	0.228376	0.219056	0.0704784	0.361107	0.568415	0.457237	0.317443	0.22532	0.386759	0.0436641	0.343095	0.386759
CDK13_HUMAN	S315,S317,S325	CDK13_HUMAN;S315,S317,S325	0.113281	0.161257	0.148003	0.706764	0.636159	0.562059	0.179955	0.202584	0.289938	0.508316	0.539048	0.523249	0.39469	0.338907	0.344521	0.0969937	0.122045	0.13223	0.140847	0.634994	0.224159	0.523538	0.359372	0.11709	0.382691	0.275622	0.107069	0.382691
ACINU_HUMAN	S410,T414	ACINU_HUMAN;S410,T414	0.248743	0.346602	0.205077	0.352405	0.259845	0.28602	0.398852	0.393553	0.508903	0.0913893	0.0609287	0.105267	0.143244	0.12968	0.033975	0.765367	0.809391	0.860758	0.266807	0.299423	0.433769	0.0858617	0.1023	0.811839	0.180946	0.197124	0.378069	0.378069
ACINU_HUMAN	S216	ACINU_HUMAN;S216	0.247151	0.220236	0.215858	0.350506	0.218007	0.380023	0.402343	0.561756	0.404119	0.0913893	0.0609287	0.105267	0.143244	0.12968	0.033975	0.765367	0.809391	0.860758	0.227748	0.316179	0.456073	0.0858617	0.1023	0.811839	0.141887	0.213879	0.355766	0.355766
	ID_pSite
	HS90B_HUMAN;S226
	RBM14_HUMAN;T206
	RBM14_HUMAN;S582
	MCM6_HUMAN;S762
	CDK13_HUMAN;S315,S317,S325
	CDK13_HUMAN;S358,S360
	CDK13_HUMAN;S383
	ANXA3_HUMAN;S129,T134,Y136
	MAP4_HUMAN;T571
	CLCA_HUMAN;S105
	NPM_HUMAN;S137
	NOLC1_HUMAN;T607,T610
	FND3A_HUMAN;S203,S207,S213
	CTND1_HUMAN;S864
	CTND1_HUMAN;S920
	HNRPD_HUMAN;S82
	ODPA_HUMAN;S291
	PPBI_HUMAN;S111
	PDIA6_HUMAN;S428
	SF3B1_HUMAN;T223,T227
	SF3B1_HUMAN;T223,S229
	MY18A_HUMAN;S140
	NOP56_HUMAN;S569,S570
	LMNA_HUMAN;S22
	DESP_HUMAN;S178
	ACINU_HUMAN;S216
	ACINU_HUMAN;S410,T414
	LMNB1_HUMAN;T20,S23
	IF4G1_HUMAN;S1231
	DSRAD_HUMAN;S1064,T1066,Y1069,S1072
	LMNB2_HUMAN;T14,S17
	AT2B1_HUMAN;S1193
	MRP4_HUMAN;T646

## Sheet: SupplTable
Supplementary Table S4 Comparison of the enrichment ratios between the phosphoppeptides and the corresponding proteins.
		Proteome									Phospho proteome									Average						SD						Difference of enrichment ratio (|Phospho-Proteome|)				p value (Phospho vs Whole)
		Cytoplasm			Organelle			Nucleus			Cytoplasm			Organelle			Nucleus			Proteome			Phospho proteome			Proteome			Phospho proteome
UniProt ID	pSite	No.1	No.2	No.3	No.1	No.2	No.3	No.1	No.2	No.3	No.1	No.2	No.3	No.1	No.2	No.3	No.1	No.2	No.3	Cytoplasm	Organelle	Nucleus	Cytoplasm	Organelle	Nucleus	Cytoplasm	Organelle	Nucleus	Cytoplasm	Organelle	Nucleus	Cytoplasm	Organelle	Nucleus	MAX	Cytoplasm	Organelle	Nucleus	MIN
AT2B1_HUMAN	S1193	0.104	0.480182	0.110748	0.0247592	0.0396363	0.0418546	0.87124	0.480182	0.847398	0.00566573	0.0213918	0.0191911	0.993432	0.975541	0.973038	0.000902489	0.00306677	0.00777132	0.231643	0.0354167	0.73294	0.0154162	0.98067	0.00391353	0.215267	0.00929606	0.219219	0.00851557	0.0111225	0.00351183	0.216227	0.945254	0.729027	0.945254	0.157129	3.68511e-08	0.00450884	3.68511e-08
LMNB1_HUMAN	T20,S23	0.0319552	0.0363538	0.0310553	0.0669357	0.0644774	0.0450448	0.901109	0.899169	0.9239	0.418047	0.42497	0.429093	0.501602	0.472491	0.49938	0.0803514	0.102539	0.0715272	0.0331214	0.0588193	0.908059	0.424036	0.491158	0.084806	0.00283525	0.0119922	0.0137527	0.00558203	0.0162038	0.0159788	0.390915	0.432338	0.823253	0.823253	4.38383e-08	3.136e-06	2.86289e-07	4.38383e-08
LMNB2_HUMAN	T14,S17	0.0817858	0.104789	0.0815023	0.090339	0.0971748	0.0783739	0.827875	0.798036	0.840124	0.135411	0.137789	0.113557	0.853281	0.840895	0.870653	0.0113076	0.0213158	0.0157905	0.089359	0.0886293	0.822012	0.128919	0.854943	0.0161379	0.0133634	0.00951634	0.0216477	0.0133572	0.0149482	0.00501312	0.0395599	0.766314	0.805874	0.805874	0.0222292	1.90395e-07	3.84707e-07	1.90395e-07
NOLC1_HUMAN	T607,T610	0.205708	0.314286	0.231727	0.415811	0.310981	0.364141	0.378481	0.374733	0.404132	0.887478	0.88443	0.876006	0.0976804	0.0901423	0.0949741	0.0148413	0.025428	0.02902	0.250573	0.363644	0.385782	0.882638	0.0942656	0.0230964	0.0566896	0.052417	0.0160016	0.00594239	0.00381867	0.0073713	0.632065	0.269379	0.362686	0.632065	4.33073e-05	0.000889348	3.69251e-06	3.69251e-06
DESP_HUMAN	S178	0.0532022	0.0297897	0.0396649	0.0459656	0.211054	0.0539679	0.900832	0.759157	0.906367	0.379896	0.322276	0.222257	0.366092	0.368611	0.463864	0.254013	0.309113	0.313879	0.0408856	0.103662	0.855452	0.308143	0.399522	0.292335	0.0117539	0.0930896	0.0834401	0.0797641	0.0557362	0.0332735	0.267257	0.29586	0.563117	0.563117	0.00456018	0.00915126	0.000408343	0.000408343
SF3B1_HUMAN	T223,S229	0.143358	0.106446	0.112259	0.434801	0.494842	0.438086	0.421841	0.398711	0.449655	0.00739118	0.00481962	0.00614682	0.0145859	0.00826047	0.00694307	0.978023	0.98692	0.98691	0.120688	0.45591	0.423403	0.00611921	0.0099298	0.983951	0.0198472	0.0337568	0.0255078	0.001286	0.00408572	0.00513384	0.114569	0.44598	0.560548	0.560548	0.000566948	2.224e-05	3.08008e-06	3.08008e-06
SF3B1_HUMAN	T223,T227	0.143358	0.106446	0.112259	0.434801	0.494842	0.438086	0.421841	0.398711	0.449655	0.00387586	0.00234606	0.00171857	0.0116542	0.0365681	0.0336403	0.98447	0.961086	0.964641	0.120688	0.45591	0.423403	0.00264683	0.0272875	0.970066	0.0198472	0.0337568	0.0255078	0.00110965	0.0136177	0.0126005	0.118041	0.428622	0.546663	0.546663	0.000503964	3.41263e-05	4.86147e-06	4.86147e-06
CTND1_HUMAN	S920	0.0662212	0.0568083	0.0295549	0.882171	0.784743	0.812312	0.0516081	0.158449	0.158133	0.512989	0.318703	0.52134	0.421474	0.340648	0.119951	0.0655372	0.340648	0.358709	0.0508615	0.826409	0.12273	0.45101	0.294025	0.254965	0.0190428	0.0502202	0.0615935	0.114657	0.156075	0.164298	0.400149	0.532384	0.132235	0.532384	0.0039713	0.00491482	0.2618	0.0039713
MY18A_HUMAN	S140	0.652583	0.249731	0.333035	0.253669	0.623727	0.392444	0.0937487	0.126542	0.274521	0.317485	0.30576	0.272508	0.0186213	0.0173701	0.0135038	0.663894	0.67687	0.713988	0.411783	0.42328	0.164937	0.298584	0.0164984	0.684917	0.212658	0.186946	0.0963082	0.0233314	0.00266782	0.0259989	0.113198	0.406782	0.51998	0.51998	0.411273	0.0196311	0.00083369	0.00083369
HS90B_HUMAN	S226	0.677534	0.710178	0.699403	0.192318	0.156708	0.163438	0.130147	0.133114	0.137159	0.103697	0.290072	0.13714	0.282467	0.366882	0.298406	0.613836	0.343045	0.564455	0.695705	0.170822	0.133474	0.176969	0.315919	0.507112	0.0166328	0.0189185	0.00351993	0.0993668	0.0448497	0.144215	0.518735	0.145097	0.373638	0.518735	0.00087405	0.00668433	0.0109382	0.00087405
PDIA6_HUMAN	S428	0.18603	0.153446	0.20682	0.775942	0.735844	0.744041	0.038028	0.11071	0.0491385	0.176693	0.155818	0.223641	0.299735	0.250589	0.171877	0.523572	0.593593	0.604482	0.182099	0.751942	0.0659589	0.185384	0.240734	0.573882	0.0269033	0.0211845	0.0391519	0.0347368	0.0644961	0.0439087	0.00328526	0.511209	0.507923	0.511209	0.903206	0.000199439	0.000116478	0.000116478
CLCA_HUMAN	S105	0.434138	0.357271	0.450822	0.561223	0.626666	0.542333	0.00463835	0.0160628	0.00684531	0.908815	0.868721	0.92167	0.0693011	0.0947923	0.059277	0.0218837	0.0364868	0.0190529	0.414077	0.576741	0.00918215	0.899735	0.0744568	0.0258078	0.0498978	0.0442564	0.00606013	0.0276177	0.0183104	0.00935599	0.485658	0.502284	0.0166256	0.502284	0.00012298	5.40176e-05	0.0611147	5.40176e-05
NOP56_HUMAN	S569,S570	0.114103	0.115042	0.0471083	0.126253	0.159806	0.112399	0.759643	0.725152	0.840492	0.100207	0.342445	0.357818	0.857013	0.251764	0.235916	0.0427802	0.405791	0.406266	0.0920844	0.13282	0.775096	0.266824	0.448231	0.284946	0.0389532	0.0243761	0.0592026	0.144499	0.354104	0.209722	0.174739	0.315411	0.49015	0.49015	0.113196	0.198602	0.0176038	0.0176038
LMNA_HUMAN	S22	0.0544207	0.0418619	0.0504892	0.123748	0.153096	0.126271	0.821831	0.805042	0.82324	0.30806	0.339114	0.305636	0.407339	0.326105	0.329954	0.284601	0.33478	0.36441	0.0489239	0.134372	0.816704	0.317603	0.354466	0.327931	0.00642407	0.0162646	0.0101242	0.0186683	0.0458296	0.0403429	0.26868	0.220094	0.488774	0.488774	1.92046e-05	0.00143018	3.44063e-05	1.92046e-05
CTND1_HUMAN	S864	0.0662212	0.0568083	0.0295549	0.882171	0.784743	0.812312	0.0516081	0.158449	0.158133	0.334589	0.222444	0.333333	0.332705	0.388778	0.333333	0.332705	0.388778	0.333333	0.0508615	0.826409	0.12273	0.296789	0.351606	0.351606	0.0190428	0.0502202	0.0615935	0.0643875	0.0321938	0.0321938	0.245927	0.474803	0.228876	0.474803	0.00316228	0.000160438	0.00466988	0.000160438
FND3A_HUMAN	S203,S207,S213	0.0781096	0.0178924	0.147677	0.862671	0.95759	0.848658	0.0592191	0.024518	0.00366489	0.380146	0.333333	0.333333	0.60992	0.333333	0.333333	0.00993345	0.333333	0.333333	0.0812265	0.88964	0.029134	0.348938	0.425529	0.225533	0.0649486	0.0592622	0.0280633	0.0270274	0.159688	0.186715	0.267711	0.46411	0.196399	0.46411	0.00274395	0.00917526	0.145958	0.00274395
DSRAD_HUMAN	S1064,T1066,Y1069,S1072	0.0859317	0.0293393	0.0872438	0.430375	0.0737746	0.260809	0.483693	0.896886	0.651947	0.660202	0.493133	0.419855	0.190022	0.185782	0.332656	0.149776	0.321085	0.247489	0.0675049	0.254986	0.677509	0.524397	0.236153	0.23945	0.0330589	0.178371	0.207779	0.123186	0.083601	0.0859371	0.456892	0.0188329	0.438059	0.456892	0.00343245	0.876512	0.0279288	0.00343245
MAP4_HUMAN	T571	0.821544	0.383945	0.910907	0.154149	0.256994	0.0848859	0.0243066	0.359061	0.00420746	0.36787	0.113935	0.651542	0.631607	0.885597	0.346127	0.000522893	0.000468126	0.00233144	0.705465	0.165343	0.129192	0.377782	0.62111	0.00110749	0.282007	0.0865984	0.199326	0.26894	0.269888	0.00106033	0.327683	0.455767	0.128084	0.455767	0.218986	0.0495596	0.328092	0.0495596
ANXA3_HUMAN	S129,T134,Y136	0.731926	0.794521	0.733881	0.118022	0.165954	0.124225	0.150052	0.0395253	0.141895	0.315141	0.312025	0.529735	0.677707	0.661561	0.391286	0.00715232	0.026414	0.0789791	0.753442	0.136067	0.110491	0.385634	0.576851	0.0375151	0.0355885	0.026068	0.0615931	0.124805	0.160907	0.0371779	0.367809	0.440784	0.0729756	0.440784	0.00799332	0.00942192	0.153774	0.00799332
IF4G1_HUMAN	S1231	0.282461	0.29201	0.279901	0.264172	0.174942	0.215414	0.453367	0.533048	0.504685	0.609437	0.618418	0.42223	0.343773	0.333367	0.5008	0.04679	0.0482147	0.0769694	0.284791	0.218176	0.497033	0.550029	0.392647	0.0573247	0.00638171	0.0446789	0.0403875	0.110768	0.0938082	0.0170277	0.265238	0.174471	0.439709	0.439709	0.0143695	0.0437498	6.43898e-05	6.43898e-05
HNRPD_HUMAN	S82	0.123328	0.206458	0.12144	0.763179	0.660113	0.717951	0.113493	0.133429	0.160609	0.648221	0.480858	0.632857	0.224363	0.449253	0.183571	0.127416	0.0698891	0.183571	0.150409	0.713748	0.135844	0.587312	0.285729	0.126959	0.0485496	0.0516617	0.0236507	0.0925116	0.143077	0.0568425	0.436903	0.428018	0.00888478	0.436903	0.00192835	0.00819893	0.814934	0.00192835
CDK13_HUMAN	S383	0.508316	0.539048	0.523249	0.39469	0.338907	0.344521	0.0969937	0.122045	0.13223	0.0878103	0.160105	0.175759	0.870229	0.772054	0.733735	0.0419603	0.0678408	0.0905065	0.523538	0.359372	0.11709	0.141225	0.792006	0.0667692	0.0153679	0.0307144	0.0181334	0.0469158	0.0704008	0.0242908	0.382313	0.432634	0.0503205	0.432634	0.000178696	0.000618382	0.0452276	0.000178696
NPM_HUMAN	S137	0.298186	0.31517	0.313583	0.40803	0.384023	0.409325	0.293784	0.300808	0.277092	0.68535	0.872248	0.654385	0.290199	0.102319	0.339501	0.0244512	0.0254327	0.00611335	0.30898	0.400459	0.290561	0.737328	0.244006	0.0186658	0.00938142	0.0142492	0.0121821	0.117866	0.125156	0.0108818	0.428348	0.156453	0.271895	0.428348	0.0032929	0.0978425	8.61486e-06	8.61486e-06
PPBI_HUMAN	S111	0.0184622	0.0515326	0.0487435	0.857	0.769614	0.773793	0.124537	0.178853	0.177463	0.00244653	0.00213536	0.0127614	0.425905	0.498923	0.323778	0.571649	0.498942	0.66346	0.0395794	0.800136	0.160285	0.00578109	0.416202	0.578017	0.0183412	0.0492905	0.0309659	0.00604711	0.0879746	0.082444	0.0337983	0.383934	0.417732	0.417732	0.0387331	0.00273928	0.00119635	0.00119635
ODPA_HUMAN	S291	0.118128	0.0730704	0.129167	0.793051	0.891968	0.854473	0.088821	0.0349613	0.0163607	0.0720061	0.0651379	0.0655841	0.439524	0.481749	0.49043	0.48847	0.453113	0.443986	0.106789	0.846497	0.0467143	0.067576	0.470568	0.461856	0.0297178	0.0499388	0.0376328	0.00384301	0.0272327	0.0234955	0.0392125	0.375929	0.415142	0.415142	0.0860538	0.000332345	8.47904e-05	8.47904e-05
MCM6_HUMAN	S762	0.744834	0.827404	0.788675	0.178653	0.0909082	0.134033	0.0765125	0.0816879	0.0772924	0.562255	0.33133	0.24305	0.0898895	0.137496	0.219436	0.347856	0.531174	0.537514	0.786971	0.134531	0.0784976	0.378878	0.148941	0.472181	0.0413113	0.0438747	0.00279025	0.164829	0.0655271	0.107716	0.408093	0.0144091	0.393684	0.408093	0.0141491	0.767467	0.00319129	0.00319129
CDK13_HUMAN	S358,S360	0.508316	0.539048	0.523249	0.39469	0.338907	0.344521	0.0969937	0.122045	0.13223	0.11859	0.129168	0.112745	0.791105	0.746642	0.764476	0.0903047	0.12419	0.122779	0.523538	0.359372	0.11709	0.120168	0.767408	0.112425	0.0153679	0.0307144	0.0181334	0.00832419	0.0223761	0.0191693	0.40337	0.408035	0.00466513	0.408035	2.33997e-06	4.92001e-05	0.774715	2.33997e-06
MRP4_HUMAN	T646	0.236032	0.0347844	0.0240028	0.34079	0.482608	0.915722	0.423178	0.482608	0.060275	0.00569545	0.00342017	0.0038574	0.987201	0.991622	0.984088	0.00710388	0.0049579	0.0120541	0.0982732	0.579707	0.32202	0.00432434	0.987637	0.00803863	0.119425	0.299513	0.228617	0.00120737	0.00378563	0.00363929	0.0939489	0.407931	0.313982	0.407931	0.244711	0.0777622	0.0761146	0.0761146
RBM14_HUMAN	S582	0.437415	0.488509	0.445789	0.334058	0.283115	0.335155	0.228527	0.228376	0.219056	0.0570244	0.0503036	0.0574054	0.397094	0.366348	0.332719	0.545882	0.583349	0.609876	0.457237	0.317443	0.22532	0.0549111	0.365387	0.579702	0.0274033	0.0297336	0.00542482	0.00399479	0.0321984	0.0321526	0.402326	0.0479439	0.354382	0.402326	1.48087e-05	0.131031	4.6896e-05	1.48087e-05
RBM14_HUMAN	T206	0.437415	0.488509	0.445789	0.334058	0.283115	0.335155	0.228527	0.228376	0.219056	0.078185	0.0719241	0.0613261	0.300718	0.385986	0.396616	0.621097	0.54209	0.542057	0.457237	0.317443	0.22532	0.0704784	0.361107	0.568415	0.0274033	0.0297336	0.00542482	0.00852192	0.0525676	0.0456241	0.386759	0.0436641	0.343095	0.386759	1.99641e-05	0.2787	0.000206115	1.99641e-05
CDK13_HUMAN	S315,S317,S325	0.508316	0.539048	0.523249	0.39469	0.338907	0.344521	0.0969937	0.122045	0.13223	0.113281	0.161257	0.148003	0.706764	0.636159	0.562059	0.179955	0.202584	0.289938	0.523538	0.359372	0.11709	0.140847	0.634994	0.224159	0.0153679	0.0307144	0.0181334	0.0247755	0.0723595	0.058079	0.382691	0.275622	0.107069	0.382691	2.21703e-05	0.00371397	0.0381046	2.21703e-05
ACINU_HUMAN	S410,T414	0.0913893	0.0609287	0.105267	0.143244	0.12968	0.033975	0.765367	0.809391	0.860758	0.248743	0.346602	0.205077	0.352405	0.259845	0.28602	0.398852	0.393553	0.508903	0.0858617	0.1023	0.811839	0.266807	0.299423	0.433769	0.0226801	0.0595582	0.0477426	0.072471	0.0477137	0.0651217	0.180946	0.197124	0.378069	0.378069	0.014527	0.0110405	0.00125705	0.00125705
ACINU_HUMAN	S216	0.0913893	0.0609287	0.105267	0.143244	0.12968	0.033975	0.765367	0.809391	0.860758	0.247151	0.220236	0.215858	0.350506	0.218007	0.380023	0.402343	0.561756	0.404119	0.0858617	0.1023	0.811839	0.227748	0.316179	0.456073	0.0226801	0.0595582	0.0477426	0.0169448	0.0862904	0.0915291	0.141887	0.213879	0.355766	0.355766	0.00096936	0.024161	0.00395667	0.00096936
RRMJ3_HUMAN	S335,S336	0.276842	0.388337	0.611352	0.17095	0.197674	0.093671	0.552209	0.413989	0.294977	0.0812652	0.0856736	0.0670284	0.335241	0.258782	0.332468	0.583493	0.655544	0.600503	0.42551	0.154098	0.420392	0.0779891	0.308831	0.61318	0.170325	0.0540103	0.128735	0.00974479	0.0433654	0.0376612	0.347521	0.154732	0.192789	0.347521	0.0242698	0.018005	0.06752	0.018005
MY18A_HUMAN	S1970,S1974	0.652583	0.249731	0.333035	0.253669	0.623727	0.392444	0.0937487	0.126542	0.274521	0.301833	0.307815	0.191571	0.217733	0.279925	0.182318	0.480434	0.412259	0.626112	0.411783	0.42328	0.164937	0.267073	0.226658	0.506268	0.212658	0.186946	0.0963082	0.0654554	0.0494121	0.109242	0.144709	0.196621	0.341331	0.341331	0.322972	0.153001	0.0153546	0.0153546
ACINU_HUMAN	S386,S388	0.0913893	0.0609287	0.105267	0.143244	0.12968	0.033975	0.765367	0.809391	0.860758	0.248398	0.225569	0.22716	0.296037	0.292935	0.281481	0.455565	0.481495	0.491359	0.0858617	0.1023	0.811839	0.233709	0.290151	0.47614	0.0226801	0.0595582	0.0477426	0.0127455	0.00766716	0.018488	0.147847	0.187852	0.335699	0.335699	0.000597467	0.00562326	0.000342748	0.000342748
MY18A_HUMAN	S2007	0.652583	0.249731	0.333035	0.253669	0.623727	0.392444	0.0937487	0.126542	0.274521	0.355112	0.372438	0.40918	0.140284	0.131488	0.107827	0.504604	0.496074	0.482992	0.411783	0.42328	0.164937	0.37891	0.126533	0.494557	0.212658	0.186946	0.0963082	0.027609	0.0167862	0.0108852	0.0328725	0.296747	0.329619	0.329619	0.803738	0.0519949	0.00415322	0.00415322
ROA1_HUMAN	S364,S365,S368	0.0911858	0.119274	0.0803948	0.672846	0.618467	0.666451	0.235968	0.262259	0.253154	0.333333	0.333333	0.333333	0.333333	0.333333	0.333333	0.333333	0.333333	0.333333	0.0969514	0.652588	0.25046	0.333333	0.333333	0.333333	0.0200705	0.0297223	0.0133511	0	0	0	0.236382	0.319255	0.0828729	0.319255	3.41004e-05	4.91325e-05	0.000424308	3.41004e-05
NOP56_HUMAN	S570	0.114103	0.115042	0.0471083	0.126253	0.159806	0.112399	0.759643	0.725152	0.840492	0.450302	0.225057	0.0988689	0.337519	0.295855	0.201301	0.212179	0.479088	0.69983	0.0920844	0.13282	0.775096	0.258076	0.278225	0.463699	0.0389532	0.0243761	0.0592026	0.178028	0.0697991	0.244189	0.165992	0.145405	0.311397	0.311397	0.189789	0.0271158	0.0983592	0.0271158
NOP2_HUMAN	S786	0.126592	0.070557	0.0949606	0.431019	0.383467	0.241855	0.44239	0.545976	0.663184	0.143052	0.177477	0.162558	0.630587	0.598353	0.523307	0.226361	0.22417	0.314135	0.0973697	0.352114	0.550517	0.161029	0.584082	0.254889	0.0280949	0.0984024	0.110467	0.0172632	0.0550454	0.0513209	0.0636593	0.231969	0.295628	0.295628	0.0287341	0.0235141	0.0136548	0.0136548
K2C8_HUMAN	S34	0.193798	0.132024	0.159945	0.0962405	0.0889737	0.0786931	0.709961	0.779003	0.761362	0.405415	0.373819	0.39791	0.147055	0.160279	0.149283	0.447531	0.465902	0.452807	0.161922	0.0879691	0.750109	0.392381	0.152206	0.455413	0.0309347	0.00881677	0.03587	0.0165077	0.0070801	0.009459	0.230459	0.0642367	0.294696	0.294696	0.000339581	0.000598328	0.000161656	0.000161656
CD44_HUMAN	S706	0.0190178	0.0268267	0.030503	0.946595	0.940006	0.932077	0.0343869	0.0331676	0.0374199	0.168673	0.151956	0.168822	0.660459	0.663459	0.659668	0.170868	0.184585	0.17151	0.0254492	0.939559	0.0349915	0.163151	0.661195	0.175654	0.00586518	0.0072694	0.00218969	0.00969476	0.0019999	0.00774074	0.137701	0.278364	0.140663	0.278364	3.01094e-05	3.58189e-07	7.08006e-06	3.58189e-07
COF1_HUMAN	S3	0.854445	0.838932	0.854305	0.133845	0.147095	0.132555	0.0117106	0.0139731	0.0131407	0.988854	0.990696	0.122728	0.0105106	0.00855311	0.00922901	0.000635115	0.000751192	0.868043	0.849227	0.137832	0.0129414	0.700759	0.00943091	0.28981	0.00891634	0.00804853	0.00114433	0.500591	0.000994243	0.500765	0.148468	0.128401	0.276868	0.276868	0.634588	1.05153e-05	0.392478	1.05153e-05
MK67I_HUMAN	T234,T238	0.0221136	0.0415558	0.0262505	0.319378	0.0926683	0.0753016	0.658508	0.865776	0.898448	0.0384741	0.0621163	0.0353852	0.408315	0.426459	0.434668	0.553211	0.511424	0.529947	0.0299733	0.162449	0.807577	0.0453252	0.423147	0.531527	0.0102417	0.136182	0.130127	0.0146233	0.0134851	0.0209381	0.0153519	0.260698	0.27605	0.27605	0.210625	0.0299447	0.0222054	0.0222054
SEPT9_HUMAN	S30	0.320479	0.427545	0.343868	0.479563	0.416483	0.532297	0.199958	0.155972	0.123835	0.509593	0.765678	0.638195	0.466145	0.215174	0.313033	0.0242625	0.019148	0.0487712	0.363964	0.476114	0.159921	0.637822	0.331451	0.0307272	0.0562909	0.0579838	0.0382149	0.128043	0.126495	0.0158344	0.273858	0.144664	0.129194	0.273858	0.027498	0.146125	0.00565594	0.00565594
HUWE1_HUMAN	S1907	0.376224	0.504982	0.0794898	0.508443	0.4055	0.336377	0.115334	0.0895176	0.584133	0.570155	0.629134	0.580003	0.239992	0.140825	0.196644	0.189853	0.230041	0.223353	0.320232	0.416773	0.262995	0.593097	0.192487	0.214416	0.218202	0.0865848	0.278413	0.0315951	0.0497141	0.0215328	0.272865	0.224287	0.0485789	0.272865	0.0986878	0.017677	0.778187	0.017677
EIF3B_HUMAN	S119	0.692019	0.717551	0.707747	0.264288	0.22221	0.241189	0.0436926	0.0602387	0.0510641	0.478383	0.481557	0.390248	0.462349	0.479215	0.58386	0.0592676	0.0392277	0.0258922	0.705772	0.242563	0.0516651	0.450063	0.508475	0.0414625	0.0128801	0.0210728	0.00828942	0.0518256	0.0658279	0.0167995	0.255709	0.265912	0.0102027	0.265912	0.00115397	0.00263505	0.398931	0.00115397
SRSF2_HUMAN	T25	0.322209	0.220722	0.210132	0.645413	0.659631	0.620454	0.0323771	0.119647	0.169414	0.458881	0.576584	0.498988	0.529217	0.406485	0.446865	0.011902	0.0169306	0.0541467	0.251021	0.641833	0.107146	0.511484	0.460856	0.0276598	0.0618779	0.0198326	0.0693685	0.0598384	0.0625507	0.0230758	0.260463	0.180977	0.0794863	0.260463	0.00633604	0.00879511	0.132787	0.00633604
AHNK_HUMAN	S5830	0.179667	0.241946	0.177438	0.657971	0.596841	0.609971	0.162362	0.161212	0.212591	0.254829	0.451115	0.156469	0.526751	0.275938	0.308684	0.21842	0.272947	0.534847	0.199684	0.621594	0.178722	0.287471	0.370458	0.342071	0.0366174	0.0321798	0.0293371	0.150011	0.13634	0.16916	0.0877873	0.251136	0.163349	0.251136	0.380521	0.036043	0.174708	0.036043
THOC2_HUMAN	S1514	0.0136558	0.0193793	0.0158898	0.471319	0.369569	0.464368	0.515025	0.611051	0.519742	0.0569295	0.114936	0.0566365	0.673547	0.558121	0.646985	0.269524	0.326943	0.296378	0.0163083	0.435085	0.548606	0.0761674	0.626218	0.297615	0.00288461	0.056845	0.0541305	0.0335751	0.0604504	0.0287296	0.0598591	0.191132	0.250991	0.250991	0.0370526	0.0162711	0.00208526	0.00208526
TRA2B_HUMAN	T201	0.0917363	0.0214143	0.0273044	0.462921	0.328393	0.510439	0.445343	0.650193	0.462256	0.00499952	0.00095336	0.00335658	0.381595	0.0537078	0.247046	0.613405	0.945339	0.749597	0.0468184	0.433918	0.519264	0.00310316	0.22745	0.769447	0.0390114	0.0944253	0.113703	0.00203495	0.16482	0.166855	0.0437152	0.206468	0.250183	0.250183	0.124627	0.132874	0.0984089	0.0984089
DAB2_HUMAN	S401	0.283611	0.55611	0.403841	0.546844	0.274329	0.503952	0.169544	0.169561	0.0922071	0.552235	0.56754	0.827429	0.429845	0.412346	0.157231	0.0179202	0.0201136	0.0153397	0.414521	0.441709	0.143771	0.649068	0.333141	0.0177912	0.136563	0.146533	0.0446553	0.154655	0.152593	0.00238953	0.234547	0.108568	0.125979	0.234547	0.120303	0.424302	0.00816415	0.00816415
HACD3_HUMAN	S114	0.0106226	0.0175906	0.00587688	0.832125	0.857187	0.82492	0.157252	0.125222	0.169203	0.0092643	0.0471441	0.0220375	0.473371	0.907819	0.435027	0.517364	0.0450365	0.542935	0.0113634	0.838077	0.150559	0.0261487	0.605406	0.368445	0.00589191	0.0169373	0.0227418	0.0192716	0.262598	0.280372	0.0147853	0.232671	0.217886	0.232671	0.272687	0.200409	0.25082	0.200409
ACINU_HUMAN	S490	0.0913893	0.0609287	0.105267	0.143244	0.12968	0.033975	0.765367	0.809391	0.860758	0.134816	0.199762	0.109585	0.188107	0.368872	0.250932	0.677077	0.431366	0.639483	0.0858617	0.1023	0.811839	0.148054	0.269304	0.582642	0.0226801	0.0595582	0.0477426	0.0465234	0.0917721	0.132351	0.0621925	0.167004	0.229197	0.229197	0.105871	0.0573426	0.0477552	0.0477552
RU17_HUMAN	S226	0.0282002	0.0176675	0.0112888	0.567293	0.356055	0.55369	0.404506	0.626277	0.435021	0.0565732	0.0594222	0.0480225	0.681551	0.629262	0.740048	0.261876	0.311315	0.21193	0.0190521	0.492346	0.488602	0.0546726	0.68362	0.261707	0.0085403	0.118227	0.120203	0.00593269	0.0554217	0.0496931	0.0356205	0.191274	0.226895	0.226895	0.00404532	0.0641677	0.0391093	0.00404532
AAAT_HUMAN	S493orT494	0.0836734	0.158815	0.0948205	0.820207	0.772586	0.807147	0.0961196	0.0685994	0.0980321	0.133481	0.198528	0.113214	0.644132	0.377536	0.699621	0.222387	0.423936	0.187165	0.112436	0.79998	0.0875837	0.148408	0.573763	0.277829	0.0405497	0.0246062	0.0164687	0.0445726	0.172187	0.127752	0.0359714	0.226217	0.190246	0.226217	0.359566	0.0873877	0.0627595	0.0627595
NOP2_HUMAN	S732	0.126592	0.070557	0.0949606	0.431019	0.383467	0.241855	0.44239	0.545976	0.663184	0.146367	0.160214	0.152918	0.514377	0.517919	0.532548	0.339256	0.321867	0.314534	0.0973697	0.352114	0.550517	0.153166	0.521615	0.325219	0.0280949	0.0984024	0.110467	0.00692678	0.0096331	0.0126975	0.0557966	0.169501	0.225298	0.225298	0.0288397	0.0411722	0.0246853	0.0246853
SRC8_HUMAN	T399,S405	0.751981	0.728815	0.82253	0.157066	0.150239	0.117743	0.0909528	0.120946	0.059727	0.985334	0.993703	0.983203	0.00493872	0.00274356	0.00978679	0.00972716	0.00355326	0.00700985	0.767775	0.141683	0.090542	0.987414	0.00582303	0.00676342	0.0488132	0.0210115	0.0306116	0.00555019	0.00360393	0.00309432	0.219638	0.13586	0.0837786	0.219638	0.00149823	0.000382971	0.00919685	0.000382971
DDX21_HUMAN	S71	0.130457	0.168693	0.143925	0.383804	0.336476	0.334738	0.485739	0.494831	0.521336	0.290912	0.272593	0.231767	0.448285	0.533891	0.376217	0.260804	0.193516	0.392016	0.147692	0.351673	0.500636	0.265091	0.452797	0.282112	0.0193942	0.0278401	0.018495	0.0302777	0.0789337	0.100951	0.117399	0.101125	0.218523	0.218523	0.00481783	0.104518	0.0210573	0.00481783
ROA3_HUMAN	S366	0.0728462	0.0719045	0.0947459	0.548646	0.468924	0.474652	0.378508	0.459172	0.430602	0.0938552	0.0927704	0.104814	0.72892	0.704949	0.658629	0.177225	0.202281	0.236557	0.0798322	0.497407	0.422761	0.0971464	0.697499	0.205354	0.0129242	0.0444661	0.0408995	0.00666213	0.0357325	0.0297852	0.0173142	0.200092	0.217406	0.217406	0.108147	0.00370853	0.00174073	0.00174073
SRSF2_HUMAN	S26	0.322209	0.220722	0.210132	0.645413	0.659631	0.620454	0.0323771	0.119647	0.169414	0.550636	0.448474	0.406004	0.433027	0.48712	0.564786	0.016337	0.0644058	0.0292107	0.251021	0.641833	0.107146	0.468371	0.494977	0.0366512	0.0618779	0.0198326	0.0693685	0.0743409	0.06623	0.0248832	0.21735	0.146855	0.0704949	0.21735	0.0176585	0.0212197	0.172899	0.0176585
MY18A_HUMAN	S728	0.652583	0.249731	0.333035	0.253669	0.623727	0.392444	0.0937487	0.126542	0.274521	0.577854	0.298019	0.250085	0.165943	0.27326	0.303959	0.256203	0.428721	0.445956	0.411783	0.42328	0.164937	0.375319	0.24772	0.37696	0.212658	0.186946	0.0963082	0.17703	0.0724661	0.104933	0.0364633	0.17556	0.212023	0.212023	0.830647	0.203961	0.061434	0.061434
ROA3_HUMAN	S358	0.0728462	0.0719045	0.0947459	0.548646	0.468924	0.474652	0.378508	0.459172	0.430602	0.0691701	0.114365	0.0856708	0.718151	0.650209	0.721665	0.212679	0.235427	0.192664	0.0798322	0.497407	0.422761	0.0897351	0.696675	0.21359	0.0129242	0.0444661	0.0408995	0.0228697	0.0402793	0.0213958	0.00990294	0.199268	0.209171	0.209171	0.549415	0.00452788	0.0014233	0.0014233
LMNA_HUMAN	S628	0.0544207	0.0418619	0.0504892	0.123748	0.153096	0.126271	0.821831	0.805042	0.82324	0.253565	0.285347	0.227598	0.133516	0.0439962	0.0465584	0.612919	0.670657	0.725843	0.0489239	0.134372	0.816704	0.255503	0.0746901	0.669806	0.00642407	0.0162646	0.0101242	0.0289231	0.0509606	0.0564667	0.20658	0.0596815	0.146898	0.20658	0.00026963	0.125465	0.0113761	0.00026963
CTNA1_HUMAN	S641	0.211964	0.196607	0.153125	0.602879	0.481554	0.645282	0.185157	0.321839	0.201593	0.355473	0.403072	0.420546	0.482346	0.475846	0.308582	0.162181	0.121082	0.270872	0.187232	0.576572	0.236196	0.393031	0.422258	0.184712	0.0305191	0.0849749	0.0746226	0.0336787	0.0985002	0.0773953	0.205799	0.154314	0.0514848	0.205799	0.00142756	0.109119	0.453482	0.00142756
KI67_HUMAN	S2828	0.124477	0.250574	0.319095	0.75504	0.675504	0.561825	0.120484	0.0739217	0.11908	0.0447737	0.0427114	0.0513592	0.873773	0.891047	0.844942	0.0814537	0.0662414	0.103698	0.231382	0.664123	0.104495	0.0462814	0.869921	0.0837979	0.0987183	0.0971087	0.0264867	0.00451679	0.0232926	0.0188382	0.1851	0.205798	0.0206973	0.205798	0.0315465	0.0233882	0.331944	0.0233882
SYEP_HUMAN	S882,T888	0.548362	0.631517	0.487709	0.402436	0.288208	0.380763	0.0492023	0.0802752	0.131528	0.266895	0.509963	0.480698	0.72433	0.475605	0.486426	0.00877487	0.0144325	0.0328759	0.555863	0.357136	0.0870019	0.419185	0.56212	0.0186944	0.0721966	0.0606687	0.0415731	0.132696	0.140582	0.0126031	0.136677	0.204985	0.0683075	0.204985	0.192162	0.0812418	0.0527969	0.0527969
BASP1_HUMAN	T196	0.155896	0.281252	0.230451	0.727828	0.636293	0.665843	0.116276	0.0824549	0.103706	0.108182	0.15819	0.0957976	0.889888	0.837414	0.902097	0.00193	0.0043951	0.00210555	0.222533	0.676655	0.100812	0.120723	0.876467	0.00281021	0.0630517	0.0467152	0.0170952	0.0330331	0.0343666	0.00137535	0.10181	0.199812	0.0980022	0.199812	0.0684051	0.00396049	0.000584894	0.000584894
AHNK_HUMAN	S5841	0.179667	0.241946	0.177438	0.657971	0.596841	0.609971	0.162362	0.161212	0.212591	0.386717	0.360268	0.447301	0.503724	0.551681	0.451425	0.109559	0.0880505	0.101274	0.199684	0.621594	0.178722	0.398095	0.502277	0.099628	0.0366174	0.0321798	0.0293371	0.0446178	0.0501437	0.0108485	0.198412	0.119318	0.0790938	0.198412	0.00399378	0.0256159	0.0118767	0.00399378
PRP4B_HUMAN	S354,S356	0.0257138	0.0699059	0.0875868	0.342297	0.300862	0.387099	0.631989	0.629232	0.525315	0.0917864	0.0847684	0.0958425	0.173479	0.115589	0.145976	0.734734	0.799643	0.758182	0.0610689	0.343419	0.595512	0.0907991	0.145015	0.764186	0.031869	0.0431291	0.0608082	0.00560269	0.0289573	0.0328684	0.0297303	0.198405	0.168675	0.198405	0.186731	0.00270748	0.0134068	0.00270748
NUMA1_HUMAN	T2000	0.104992	0.132369	0.093496	0.304953	0.294717	0.346264	0.590055	0.572914	0.56024	0.00556078	0.0100858	0.00161796	0.482467	0.558355	0.499293	0.511972	0.431559	0.499089	0.110286	0.315311	0.574403	0.00575483	0.513372	0.480874	0.01997	0.02729	0.0149629	0.00423723	0.0398547	0.0431903	0.104531	0.19806	0.0935293	0.19806	0.000892783	0.00207622	0.0239246	0.000892783
MY18A_HUMAN	S2041,S2043	0.652583	0.249731	0.333035	0.253669	0.623727	0.392444	0.0937487	0.126542	0.274521	0.333142	0.348707	0.347697	0.249642	0.295503	0.341695	0.417217	0.35579	0.310608	0.411783	0.42328	0.164937	0.343182	0.295613	0.361205	0.212658	0.186946	0.0963082	0.00871004	0.0460266	0.0535103	0.0686006	0.127667	0.196267	0.196267	0.606432	0.314762	0.036735	0.036735
S12A2_HUMAN	S79	0.211892	0.414076	0.342807	0.390578	0.240403	0.498797	0.39753	0.34552	0.158396	0.159157	0.119214	0.222317	0.694415	0.532014	0.491832	0.146428	0.348772	0.285851	0.322925	0.376593	0.300482	0.166896	0.572754	0.26035	0.102548	0.129763	0.125768	0.0519853	0.10726	0.103554	0.156029	0.196161	0.0401319	0.196161	0.0784665	0.113741	0.691582	0.0784665
WDR3_HUMAN	S240orS241	0.0406609	0.505491	0.233511	0.211652	0.193704	0.461228	0.747688	0.300805	0.30526	0.122203	0.0631691	0.0767331	0.26491	0.296429	0.241996	0.612887	0.640402	0.681271	0.259888	0.288861	0.451251	0.0873685	0.267778	0.644853	0.233535	0.149544	0.256731	0.0309208	0.0273295	0.0344084	0.172519	0.021083	0.193602	0.193602	0.273435	0.821976	0.265144	0.265144
PRP4B_HUMAN	S292,S294	0.0257138	0.0699059	0.0875868	0.342297	0.300862	0.387099	0.631989	0.629232	0.525315	0.00952398	0.0865207	0.0345347	0.198893	0.144862	0.166422	0.791583	0.768617	0.799043	0.0610689	0.343419	0.595512	0.0435265	0.170059	0.786414	0.031869	0.0431291	0.0608082	0.039278	0.0271985	0.0158577	0.0175424	0.17336	0.190903	0.190903	0.580411	0.00415741	0.00624743	0.00415741
UBP2L_HUMAN	S416	0.355638	0.3303	0.276621	0.597569	0.582516	0.614303	0.0467933	0.0871842	0.109076	0.53983	0.569554	0.425798	0.417936	0.356436	0.549418	0.042234	0.0740097	0.0247833	0.320853	0.598129	0.0810177	0.511727	0.441264	0.047009	0.0403466	0.0159011	0.0315958	0.0758864	0.0985832	0.0249582	0.190874	0.156866	0.0340087	0.190874	0.0183545	0.0529391	0.217308	0.0183545
PRP4B_HUMAN	S366,S368	0.0257138	0.0699059	0.0875868	0.342297	0.300862	0.387099	0.631989	0.629232	0.525315	0.110826	0.12401	0.0727726	0.167182	0.177753	0.124538	0.721993	0.698237	0.802689	0.0610689	0.343419	0.595512	0.102536	0.156491	0.740973	0.031869	0.0431291	0.0608082	0.0266056	0.0281721	0.0547517	0.0414673	0.186929	0.145461	0.186929	0.158672	0.00327324	0.0369648	0.00327324
NEST_HUMAN	S1617,S1618	0.144142	0.321483	0.0871963	0.050347	0.152135	0.546531	0.805511	0.526381	0.366273	0.328557	0.282394	0.465452	0.114596	0.0272953	0.0486376	0.556848	0.690311	0.48591	0.184274	0.249671	0.566055	0.358801	0.0635095	0.577689	0.122191	0.262077	0.222291	0.0952029	0.0455107	0.103782	0.174527	0.186162	0.0116345	0.186162	0.122744	0.292142	0.938479	0.122744
SRSF9_HUMAN	S211,S216	0.0116984	0.0292661	0.0170205	0.513779	0.442103	0.461845	0.474522	0.528631	0.521135	0.0653168	0.101759	0.0628715	0.69659	0.480398	0.624364	0.238094	0.417842	0.312764	0.0193283	0.472576	0.508096	0.0766492	0.600451	0.3229	0.00900835	0.0370233	0.0293161	0.0217804	0.110061	0.0903019	0.0573209	0.127875	0.185196	0.185196	0.0135613	0.129138	0.0278215	0.0135613
S38A2_HUMAN	S19orY20orS21orS22	0.107552	0.175515	0.0571155	0.87166	0.808125	0.9006	0.0207881	0.0163601	0.0422842	0.00860072	0.0379965	0.0506442	0.73401	0.853045	0.687691	0.25739	0.108959	0.261664	0.113394	0.860128	0.0264775	0.0324138	0.758249	0.209338	0.0594156	0.0473039	0.0138669	0.0215705	0.0853	0.086957	0.0809804	0.10188	0.18286	0.18286	0.0907141	0.144692	0.0228221	0.0228221
MY18A_HUMAN	Y2035,S2041	0.652583	0.249731	0.333035	0.253669	0.623727	0.392444	0.0937487	0.126542	0.274521	0.331341	0.416879	0.364791	0.299169	0.281211	0.281426	0.36949	0.30191	0.353783	0.411783	0.42328	0.164937	0.371004	0.287268	0.341728	0.212658	0.186946	0.0963082	0.0431061	0.0103066	0.0353662	0.040779	0.136012	0.176791	0.176791	0.761107	0.276745	0.0405537	0.0405537
PO210_HUMAN	T1844	0.0256925	0.0262699	0.0128085	0.487795	0.539837	0.519965	0.486513	0.433893	0.467226	0.00123045	0.00115737	0.00125561	0.535995	0.765773	0.775092	0.462774	0.233069	0.223653	0.0215903	0.515866	0.462544	0.00121448	0.692287	0.306499	0.00761075	0.0262621	0.0266204	5.10311e-05	0.135433	0.13542	0.0203758	0.176421	0.156045	0.176421	0.00975577	0.0911181	0.121782	0.00975577
IMA2_HUMAN	S62	0.349942	0.309526	0.317708	0.513387	0.457098	0.395807	0.136671	0.233377	0.286485	0.46966	0.536898	0.488849	0.413173	0.325726	0.354274	0.117167	0.137376	0.156877	0.325725	0.455431	0.218844	0.498469	0.364391	0.13714	0.0213675	0.0588077	0.0759568	0.0346359	0.0445925	0.0198561	0.172744	0.0910399	0.0817043	0.172744	0.00182296	0.0994686	0.145807	0.00182296
BASP1_HUMAN	T36	0.155896	0.281252	0.230451	0.727828	0.636293	0.665843	0.116276	0.0824549	0.103706	0.0406374	0.333333	0.221103	0.928757	0.333333	0.32443	0.0306058	0.333333	0.454467	0.222533	0.676655	0.100812	0.198358	0.52884	0.272802	0.0630517	0.0467152	0.0170952	0.147668	0.346367	0.218318	0.0241753	0.147814	0.17199	0.17199	0.807135	0.504455	0.245336	0.245336
NOP58_HUMAN	S502,S514	0.0536012	0.0659713	0.0929599	0.143413	0.144706	0.145439	0.802986	0.789323	0.761601	0.0261527	0.00998823	0.0108737	0.0177398	0.0544896	0.023128	0.956107	0.935522	0.965998	0.0708442	0.144519	0.784637	0.0156716	0.0317858	0.952543	0.0201267	0.00102556	0.0210864	0.00908775	0.0198458	0.0155476	0.0551726	0.112733	0.167906	0.167906	0.0123757	0.000601558	0.000374641	0.000374641
SSRP1_HUMAN	S444	0.0376348	0.0992911	0.0523214	0.0587495	0.112914	0.0722303	0.903616	0.787795	0.875448	0.141215	0.0797265	0.0842036	0.244522	0.166508	0.21934	0.614263	0.753765	0.696456	0.0630824	0.0812978	0.85562	0.101715	0.210123	0.688162	0.032206	0.0281975	0.0604025	0.034281	0.039815	0.0701198	0.0386325	0.128826	0.167458	0.167458	0.22793	0.010234	0.0350502	0.010234
AHNK_HUMAN	S5749	0.179667	0.241946	0.177438	0.657971	0.596841	0.609971	0.162362	0.161212	0.212591	0.00891941	0.0366406	0.0549085	0.791605	0.732708	0.783492	0.199476	0.230651	0.161599	0.199684	0.621594	0.178722	0.0334895	0.769268	0.197242	0.0366174	0.0321798	0.0293371	0.0231559	0.031921	0.0345801	0.166194	0.147674	0.0185202	0.166194	0.00266373	0.00485555	0.518372	0.00266373
IF4G1_HUMAN	S1596	0.282461	0.29201	0.279901	0.264172	0.174942	0.215414	0.453367	0.533048	0.504685	0.0380936	0.331927	0.193452	0.405179	0.336147	0.403274	0.556727	0.331927	0.403274	0.284791	0.218176	0.497033	0.187824	0.381533	0.430643	0.00638171	0.0446789	0.0403875	0.146997	0.0393173	0.114872	0.0969667	0.163357	0.0663907	0.163357	0.317368	0.00894361	0.398451	0.00894361
MCM3_HUMAN	S711	0.736169	0.700377	0.748842	0.189314	0.229825	0.199982	0.0745174	0.0697983	0.0511758	0.563746	0.570148	0.566428	0.338024	0.316322	0.327581	0.0982296	0.11353	0.105991	0.728463	0.206374	0.0651638	0.566774	0.327309	0.105917	0.0251348	0.0209981	0.0123416	0.00321472	0.0108534	0.0076504	0.161689	0.120936	0.0407529	0.161689	0.00038111	0.000895517	0.00827243	0.00038111
PRP4B_HUMAN	S277	0.0257138	0.0699059	0.0875868	0.342297	0.300862	0.387099	0.631989	0.629232	0.525315	0.0859998	0.0834637	0.130031	0.190156	0.164589	0.191741	0.723844	0.751947	0.678228	0.0610689	0.343419	0.595512	0.0998315	0.182162	0.718006	0.031869	0.0431291	0.0608082	0.0261843	0.0152394	0.0372048	0.0387627	0.161257	0.122495	0.161257	0.178906	0.00364067	0.040891	0.00364067
AHNK_HUMAN	S177	0.179667	0.241946	0.177438	0.657971	0.596841	0.609971	0.162362	0.161212	0.212591	0.164517	0.122512	0.137027	0.527918	0.554439	0.47637	0.307565	0.323049	0.386602	0.199684	0.621594	0.178722	0.141352	0.519576	0.339072	0.0366174	0.0321798	0.0293371	0.0213341	0.0396973	0.0418842	0.0583315	0.102019	0.16035	0.16035	0.0756564	0.0258692	0.00557531	0.00557531
AHNK_HUMAN	S5763	0.179667	0.241946	0.177438	0.657971	0.596841	0.609971	0.162362	0.161212	0.212591	0.0402643	0.0494511	0.0289216	0.780935	0.727429	0.753827	0.178801	0.22312	0.217252	0.199684	0.621594	0.178722	0.0395457	0.754063	0.206391	0.0366174	0.0321798	0.0293371	0.0102836	0.0267538	0.024073	0.160138	0.132469	0.0276692	0.160138	0.00187953	0.00538907	0.275246	0.00187953
PRP4B_HUMAN	S431,S437	0.0257138	0.0699059	0.0875868	0.342297	0.300862	0.387099	0.631989	0.629232	0.525315	0.0694236	0.161339	0.0894634	0.165851	0.196942	0.190509	0.764725	0.641719	0.720027	0.0610689	0.343419	0.595512	0.106742	0.184434	0.708824	0.031869	0.0431291	0.0608082	0.0483322	0.0164117	0.0622636	0.045673	0.158985	0.113312	0.158985	0.243573	0.0039609	0.0871526	0.0039609
NPM_HUMAN	S243	0.298186	0.31517	0.313583	0.40803	0.384023	0.409325	0.293784	0.300808	0.277092	0.551827	0.468693	0.382153	0.277551	0.261438	0.443588	0.170622	0.269868	0.174259	0.30898	0.400459	0.290561	0.467558	0.327526	0.204916	0.00938142	0.0142492	0.0121821	0.0848428	0.100835	0.0562794	0.158578	0.0729332	0.085645	0.158578	0.03235	0.282596	0.0615776	0.03235
AHNK_HUMAN	S210	0.179667	0.241946	0.177438	0.657971	0.596841	0.609971	0.162362	0.161212	0.212591	0.0839936	0.0910176	0.0928628	0.580906	0.622772	0.516848	0.3351	0.286211	0.39029	0.199684	0.621594	0.178722	0.0892914	0.573508	0.3372	0.0366174	0.0321798	0.0293371	0.00467986	0.0533481	0.0520712	0.110392	0.0480859	0.158478	0.158478	0.00660826	0.252245	0.0100861	0.00660826
PRP4B_HUMAN	S294	0.0257138	0.0699059	0.0875868	0.342297	0.300862	0.387099	0.631989	0.629232	0.525315	0.0638336	0.0824697	0.0557355	0.229708	0.156779	0.17765	0.706458	0.760751	0.766615	0.0610689	0.343419	0.595512	0.0673463	0.188046	0.744608	0.031869	0.0431291	0.0608082	0.0137089	0.0375595	0.0331686	0.00627742	0.155374	0.149096	0.155374	0.769635	0.00927031	0.0203276	0.00927031
PO210_HUMAN	S1874	0.0256925	0.0262699	0.0128085	0.487795	0.539837	0.519965	0.486513	0.433893	0.467226	0.000382311	0.000701406	0.000474575	0.811079	0.425988	0.771716	0.188538	0.57331	0.227809	0.0215903	0.515866	0.462544	0.000519431	0.669595	0.329886	0.00761075	0.0262621	0.0266204	0.000164209	0.211885	0.211724	0.0210709	0.153729	0.132658	0.153729	0.00868496	0.280391	0.342197	0.00868496
H15_HUMAN	S18	0.519167	0.320782	0.471172	0.235346	0.40696	0.280028	0.245487	0.272258	0.248801	0.579928	0.323797	0.184515	0.191339	0.302208	0.191131	0.228733	0.373995	0.624354	0.43704	0.307445	0.255515	0.362747	0.228226	0.409027	0.103503	0.0890315	0.0145938	0.200564	0.0640703	0.200123	0.0742937	0.0792185	0.153512	0.153512	0.599073	0.279141	0.255758	0.255758
ROA2_HUMAN	S259	0.053934	0.0593359	0.0458086	0.754233	0.688147	0.712058	0.191833	0.252517	0.242133	0.115206	0.115911	0.11816	0.829933	0.806485	0.787799	0.0548607	0.0776037	0.0940417	0.0530262	0.718146	0.228828	0.116426	0.808072	0.075502	0.00680919	0.0334609	0.0324562	0.00154264	0.0211121	0.0196749	0.0633993	0.0899266	0.153326	0.153326	9.5458e-05	0.0170056	0.00219553	9.5458e-05
NUDC_HUMAN	S139	0.593946	0.525483	0.713153	0.237234	0.254016	0.134157	0.16882	0.220501	0.152691	0.756843	0.752425	0.7831	0.13757	0.113153	0.101994	0.105587	0.134421	0.114906	0.610861	0.208469	0.18067	0.764123	0.117573	0.118305	0.0949714	0.064901	0.0354247	0.0165829	0.0181951	0.0147148	0.153262	0.0908962	0.0623659	0.153262	0.0511914	0.0797487	0.0480216	0.0480216
RRBP1_HUMAN	S615	0.0454199	0.108178	0.117337	0.837768	0.733263	0.768286	0.116812	0.158559	0.114378	0.0789865	0.0458735	0.0378178	0.915394	0.948863	0.920877	0.00561921	0.00526317	0.0413048	0.0903114	0.779772	0.129916	0.0542259	0.928378	0.0173957	0.0391459	0.053191	0.0248353	0.0218183	0.0179511	0.0207067	0.0360854	0.148606	0.112521	0.148606	0.235588	0.0101453	0.00381859	0.00381859
PGRC1_HUMAN	S57	0.0341093	0.0831443	0.239992	0.928849	0.866852	0.750543	0.0370421	0.0500034	0.00946482	0.001293	0.00240495	0.00391684	0.996447	0.995138	0.992544	0.00225997	0.00245661	0.00353933	0.119082	0.848748	0.0321701	0.00253826	0.99471	0.00275197	0.107543	0.090521	0.0207038	0.00131699	0.00198659	0.000688923	0.116544	0.145962	0.0294181	0.145962	0.133765	0.0492016	0.0697123	0.0492016
IF16_HUMAN	S106	0.118658	0.0412129	0.0534994	0.759152	0.635932	0.672838	0.12219	0.322855	0.273662	0.0211737	0.127931	0.0457841	0.875193	0.809173	0.81617	0.103634	0.0628967	0.138046	0.0711235	0.689307	0.239569	0.0649628	0.833512	0.101526	0.0416222	0.0632391	0.104587	0.0559029	0.036266	0.0376191	0.0061607	0.144204	0.138044	0.144204	0.88573	0.0266285	0.0978498	0.0266285
LMNA_HUMAN	S458	0.0544207	0.0418619	0.0504892	0.123748	0.153096	0.126271	0.821831	0.805042	0.82324	0.0387242	0.01549	0.0126128	0.0222337	0.00645321	0.0219802	0.939042	0.978057	0.965407	0.0489239	0.134372	0.816704	0.0222757	0.016889	0.960835	0.00642407	0.0162646	0.0101242	0.0143173	0.00903857	0.0199051	0.0266483	0.117483	0.144131	0.144131	0.0423345	0.000397117	0.000364552	0.000364552
SEPT9_HUMAN	S80	0.320479	0.427545	0.343868	0.479563	0.416483	0.532297	0.199958	0.155972	0.123835	0.311065	0.424429	0.319776	0.672207	0.545733	0.641956	0.0167287	0.0298376	0.0382682	0.363964	0.476114	0.159921	0.351757	0.619965	0.0282782	0.0562909	0.0579838	0.0382149	0.063087	0.0660424	0.0108541	0.0122075	0.143851	0.131643	0.143851	0.814846	0.0471037	0.00456545	0.00456545
TOP2B_HUMAN	S1375	0.0603819	0.0148618	0.0334855	0.164389	0.148083	0.491282	0.775229	0.837055	0.475233	0.0465605	0.061304	0.0706713	0.37359	0.410227	0.377402	0.579849	0.528469	0.551926	0.0362431	0.267918	0.695839	0.059512	0.387073	0.553415	0.022885	0.193611	0.193536	0.0121549	0.0201422	0.0257224	0.0232689	0.119155	0.142424	0.142424	0.194843	0.348808	0.275027	0.194843
AKA12_HUMAN	T285	0.799947	0.767826	0.802956	0.151669	0.206276	0.181434	0.0483841	0.0258975	0.0156096	0.671458	0.826908	0.85608	0.0690952	0.0429672	0.0166179	0.259446	0.130125	0.127302	0.790243	0.179793	0.0299637	0.784815	0.0428934	0.172291	0.0194717	0.0273406	0.0167614	0.0992477	0.0262387	0.0754919	0.00542748	0.1369	0.142327	0.142327	0.930415	0.00332691	0.0332841	0.00332691
MCM2_HUMAN	S41	0.723715	0.754293	0.811743	0.218273	0.143012	0.120942	0.0580124	0.102695	0.067315	0.922891	0.920767	0.872099	0.0542796	0.0305202	0.113398	0.0228293	0.0487129	0.0145031	0.76325	0.160742	0.0760074	0.905252	0.066066	0.0286817	0.0446923	0.0510302	0.0235753	0.0287316	0.0426778	0.0178401	0.142002	0.0946762	0.0473256	0.142002	0.00981303	0.0693159	0.0501977	0.00981303
AHNK_HUMAN	S135	0.179667	0.241946	0.177438	0.657971	0.596841	0.609971	0.162362	0.161212	0.212591	0.222305	0.256351	0.0357635	0.334565	0.279267	0.912633	0.44313	0.464382	0.0516032	0.199684	0.621594	0.178722	0.171473	0.508822	0.319705	0.0366174	0.0321798	0.0293371	0.118754	0.350802	0.232426	0.0282108	0.112772	0.140983	0.140983	0.714234	0.608794	0.356104	0.356104
YBOX1_HUMAN	S174	0.266144	0.443274	0.286942	0.64758	0.506464	0.674703	0.0862757	0.0502625	0.0383545	0.527675	0.44033	0.451199	0.461805	0.543867	0.541127	0.0105202	0.015803	0.00767312	0.33212	0.609582	0.0582976	0.473068	0.5156	0.0113321	0.0968221	0.0903273	0.0249506	0.0476022	0.046608	0.00412528	0.140948	0.0939824	0.0469655	0.140948	0.0864187	0.184521	0.0323837	0.0323837
PGRC1_HUMAN	S181	0.0341093	0.0831443	0.239992	0.928849	0.866852	0.750543	0.0370421	0.0500034	0.00946482	0.0049415	0.00388863	0.00623677	0.989503	0.99087	0.988612	0.00555506	0.00524087	0.00515139	0.119082	0.848748	0.0321701	0.0050223	0.989662	0.00531577	0.107543	0.090521	0.0207038	0.00117616	0.00113764	0.000212003	0.11406	0.140914	0.0268543	0.140914	0.140103	0.0543151	0.0879875	0.0543151
LYRIC_HUMAN	S298	0.0137656	0.0143237	0.055821	0.78533	0.854467	0.723206	0.200905	0.131209	0.220973	0.0162635	0.0112943	0.00952661	0.976835	0.82671	0.978721	0.00690194	0.161995	0.0117526	0.0279701	0.787668	0.184362	0.0123615	0.927422	0.0602166	0.0241212	0.0656621	0.0471131	0.00349293	0.0872238	0.0881763	0.0156086	0.139754	0.124146	0.139754	0.329527	0.0908991	0.0978898	0.0908991
RL14_HUMAN	S139	0.361638	0.41961	0.351047	0.492102	0.426643	0.502202	0.14626	0.153747	0.146752	0.379839	0.364807	0.130801	0.52403	0.510381	0.229743	0.0961314	0.124812	0.639455	0.377431	0.473649	0.14892	0.291816	0.421385	0.2868	0.0369095	0.0410204	0.00418792	0.139645	0.166106	0.305745	0.0856157	0.0522642	0.13788	0.13788	0.362609	0.624747	0.478431	0.362609
TOM70_HUMAN	S91	0.0429317	0.0692702	0.0706888	0.7758	0.885261	0.876096	0.181268	0.0454684	0.0532148	0.00141105	0.00517547	0.00115583	0.975279	0.987955	0.983001	0.0233095	0.00686967	0.0158429	0.0609636	0.845719	0.093317	0.00258078	0.982079	0.0153407	0.0156321	0.0607247	0.076266	0.00225069	0.0063879	0.00823143	0.0583828	0.136359	0.0779763	0.136359	0.00305595	0.0180237	0.153098	0.00305595
K1C18_HUMAN	S7	0.206959	0.136108	0.196354	0.0748715	0.104764	0.0737218	0.71817	0.759128	0.729924	0.0583271	0.0387032	0.035175	0.149269	0.251656	0.204218	0.792403	0.709641	0.760607	0.179807	0.0844523	0.735741	0.0440684	0.201714	0.754217	0.0382139	0.0175996	0.0210896	0.0124738	0.0512392	0.0417497	0.135738	0.117262	0.0184763	0.135738	0.00426279	0.0199667	0.531442	0.00426279
NSUN2_HUMAN	S743,S751	0.616924	0.657392	0.805937	0.312964	0.322042	0.147696	0.0701117	0.0205658	0.0463666	0.834715	0.804626	0.84421	0.156845	0.180628	0.146411	0.00844063	0.0147453	0.009379	0.693418	0.260901	0.0456814	0.82785	0.161295	0.010855	0.0995235	0.0981434	0.0247801	0.0206653	0.0175373	0.00340164	0.134432	0.0996061	0.0348264	0.134432	0.0837901	0.158598	0.0734241	0.0734241
PGRC1_HUMAN	Y180	0.0341093	0.0831443	0.239992	0.928849	0.866852	0.750543	0.0370421	0.0500034	0.00946482	0.00351061	0.0043643	0.00574869	0.984716	0.985301	0.978153	0.0117737	0.0103347	0.0160987	0.119082	0.848748	0.0321701	0.0045412	0.982723	0.0127357	0.107543	0.090521	0.0207038	0.00112948	0.00396896	0.003	0.114541	0.133975	0.0194344	0.133975	0.138848	0.0625683	0.182889	0.0625683
SRC8_HUMAN	T401,S405	0.751981	0.728815	0.82253	0.157066	0.150239	0.117743	0.0909528	0.120946	0.059727	0.901814	0.962365	0.838476	0.0723098	0.0307527	0.112452	0.0258758	0.00688185	0.0490727	0.767775	0.141683	0.090542	0.900885	0.071838	0.0272768	0.0488132	0.0210115	0.0306116	0.0619501	0.0408515	0.0211303	0.13311	0.0698448	0.0632652	0.13311	0.0431059	0.0579785	0.0421386	0.0421386
TR150_HUMAN	S248,S253	0.197341	0.0148435	0.0579702	0.583983	0.754805	0.669563	0.218675	0.230352	0.272467	0.18085	0.224861	0.21088	0.604856	0.494914	0.511808	0.214294	0.280225	0.277311	0.0900517	0.66945	0.240498	0.205531	0.537193	0.257277	0.095385	0.0854108	0.0282949	0.0224881	0.0592037	0.0372524	0.115479	0.132258	0.0167791	0.132258	0.110821	0.0922107	0.568083	0.0922107
EIF3C_HUMAN	S39	0.707481	0.662582	0.64771	0.24832	0.298716	0.300776	0.0441989	0.0387012	0.0515141	0.536398	0.579099	0.50555	0.393287	0.333426	0.414147	0.0703153	0.0874757	0.0803033	0.672591	0.282604	0.0448047	0.540349	0.380287	0.0793648	0.0311174	0.029709	0.0064279	0.0369333	0.0419016	0.0086186	0.132242	0.0976823	0.03456	0.132242	0.00901872	0.0301055	0.00509845	0.00509845
KI67_HUMAN	S1861	0.124477	0.250574	0.319095	0.75504	0.675504	0.561825	0.120484	0.0739217	0.11908	0.184969	0.215751	0.151501	0.783224	0.764842	0.839197	0.0318072	0.0194078	0.00930233	0.231382	0.664123	0.104495	0.184074	0.795754	0.0201724	0.0987183	0.0971087	0.0264867	0.0321343	0.0387291	0.0112719	0.0473082	0.131631	0.0843227	0.131631	0.474102	0.0946642	0.00711153	0.00711153
ROA1_HUMAN	S362	0.0911858	0.119274	0.0803948	0.672846	0.618467	0.666451	0.235968	0.262259	0.253154	0.00541384	0.0368154	0.0132745	0.860112	0.731268	0.761201	0.134474	0.231916	0.225525	0.0969514	0.652588	0.25046	0.0185012	0.784194	0.197305	0.0200705	0.0297223	0.0133511	0.0163402	0.0674292	0.054507	0.0784502	0.131606	0.0531554	0.131606	0.00629652	0.0364552	0.176224	0.00629652
IF16_HUMAN	S153	0.118658	0.0412129	0.0534994	0.759152	0.635932	0.672838	0.12219	0.322855	0.273662	0.0457488	0.199286	0.360684	0.949963	0.733686	0.318768	0.00428843	0.0670283	0.320547	0.0711235	0.689307	0.239569	0.201906	0.667472	0.130621	0.0416222	0.0632391	0.104587	0.157484	0.320764	0.167445	0.130783	0.0218349	0.108948	0.130783	0.236707	0.913483	0.393287	0.236707
HNRPC_HUMAN	S233	0.04013	0.040455	0.0546913	0.240388	0.182293	0.179797	0.719482	0.777252	0.765512	0.037806	0.025524	0.0322631	0.45993	0.201364	0.33029	0.502264	0.773112	0.637447	0.0450921	0.200826	0.754082	0.0318644	0.330528	0.637607	0.00831472	0.0342843	0.0305338	0.00615069	0.129283	0.135424	0.0132277	0.129702	0.116474	0.129702	0.0910916	0.168332	0.219828	0.0910916
MAP4_HUMAN	S636	0.821544	0.383945	0.910907	0.154149	0.256994	0.0848859	0.0243066	0.359061	0.00420746	0.80203	0.740603	0.740359	0.196509	0.256235	0.255514	0.001461	0.00316249	0.00412754	0.705465	0.165343	0.129192	0.760997	0.236086	0.00291701	0.282007	0.0865984	0.199326	0.0355358	0.0342766	0.00135011	0.0555322	0.0707426	0.126275	0.126275	0.752082	0.258643	0.334153	0.258643
MAP4_HUMAN	T521	0.821544	0.383945	0.910907	0.154149	0.256994	0.0848859	0.0243066	0.359061	0.00420746	0.756914	0.763214	0.612502	0.240398	0.235138	0.379277	0.00268765	0.00164841	0.00822045	0.705465	0.165343	0.129192	0.710877	0.284938	0.0041855	0.282007	0.0865984	0.199326	0.0852532	0.0817429	0.00353279	0.0054117	0.119595	0.125006	0.125006	0.976143	0.156936	0.338518	0.156936
BOP1_HUMAN	S126,S127	0.20807	0.153981	0.277436	0.233385	0.171945	0.101955	0.558545	0.674074	0.620609	0.186309	0.11067	0.143432	0.128821	0.0723986	0.131562	0.68487	0.816931	0.725006	0.213162	0.169095	0.617743	0.146804	0.110927	0.742269	0.0618851	0.0657613	0.0578177	0.0379318	0.0333949	0.0677018	0.0663586	0.0581676	0.124526	0.124526	0.188484	0.243699	0.0725582	0.0725582
DEK_HUMAN	S32	0.0198095	0.156096	0.0195096	0.264214	0.264035	0.337377	0.715976	0.57987	0.643113	0.0398428	0.0610793	0.0929493	0.516057	0.39394	0.325336	0.4441	0.54498	0.581715	0.0651382	0.288542	0.64632	0.0646238	0.411778	0.523598	0.0787715	0.0422927	0.06811	0.0267301	0.0966035	0.0712553	0.000514372	0.123236	0.122721	0.123236	0.991967	0.112972	0.09728	0.09728
MAP4_HUMAN	T282	0.821544	0.383945	0.910907	0.154149	0.256994	0.0848859	0.0243066	0.359061	0.00420746	0.768932	0.710848	0.778738	0.225294	0.282181	0.211921	0.00577374	0.00697083	0.00934109	0.705465	0.165343	0.129192	0.75284	0.239799	0.00736189	0.282007	0.0865984	0.199326	0.0366946	0.0373083	0.00181554	0.0473745	0.0744554	0.12183	0.12183	0.787271	0.243224	0.349474	0.243224
KI67_HUMAN	S1131	0.124477	0.250574	0.319095	0.75504	0.675504	0.561825	0.120484	0.0739217	0.11908	0.196426	0.153293	0.181458	0.782748	0.808405	0.765755	0.020826	0.0383017	0.0527869	0.231382	0.664123	0.104495	0.177059	0.785636	0.0373049	0.0987183	0.0971087	0.0264867	0.0219003	0.0214714	0.0160038	0.0543227	0.121513	0.0671903	0.121513	0.404789	0.101774	0.0197642	0.0197642
NOP56_HUMAN	S519	0.114103	0.115042	0.0471083	0.126253	0.159806	0.112399	0.759643	0.725152	0.840492	0.021974	0.019416	0.047341	0.0668498	0.0487922	0.107328	0.911176	0.931792	0.845331	0.0920844	0.13282	0.775096	0.029577	0.0743233	0.8961	0.0389532	0.0243761	0.0592026	0.0154371	0.0299749	0.045159	0.0625074	0.0584964	0.121004	0.121004	0.061077	0.0586494	0.0480849	0.0480849
SRC8_HUMAN	S418	0.751981	0.728815	0.82253	0.157066	0.150239	0.117743	0.0909528	0.120946	0.059727	0.894742	0.824445	0.944727	0.0987148	0.167039	0.0107092	0.00654299	0.00851608	0.0445638	0.767775	0.141683	0.090542	0.887971	0.0921543	0.0198743	0.0488132	0.0210115	0.0306116	0.0604262	0.0783711	0.0214045	0.120196	0.0495285	0.0706677	0.120196	0.0552244	0.350011	0.0305906	0.0305906
TR150_HUMAN	S682	0.197341	0.0148435	0.0579702	0.583983	0.754805	0.669563	0.218675	0.230352	0.272467	0.0250216	0.0229642	0.0190445	0.63981	0.575131	0.636232	0.335169	0.401905	0.344723	0.0900517	0.66945	0.240498	0.0223434	0.617058	0.360599	0.095385	0.0854108	0.0282949	0.00303653	0.0363536	0.0360896	0.0677083	0.0523928	0.120101	0.120101	0.286475	0.383623	0.0105284	0.0105284
CPSF7_HUMAN	T203	0.0887033	0.122765	0.157932	0.814805	0.777149	0.764965	0.0964916	0.100086	0.0771026	0.00107995	0.0101203	0.000114383	0.998022	0.673333	0.99349	0.00089759	0.316546	0.00639581	0.123133	0.78564	0.0912267	0.00377155	0.888282	0.107947	0.034616	0.0259822	0.0123632	0.00551935	0.186165	0.180674	0.119362	0.102642	0.0167199	0.119362	0.00413421	0.397805	0.8807	0.00413421
RS6_HUMAN	S380	0.472711	0.478917	0.493181	0.427613	0.391533	0.355531	0.0996763	0.129549	0.151288	0.439283	0.583343	0.607292	0.556624	0.40712	0.381959	0.00409344	0.00953684	0.0107483	0.481603	0.391559	0.126838	0.543306	0.448568	0.0081262	0.0104961	0.0360411	0.0259126	0.0908789	0.0944209	0.00354461	0.0617029	0.0570087	0.118712	0.118712	0.307596	0.383885	0.00141458	0.00141458
AHNK_HUMAN	S5731	0.179667	0.241946	0.177438	0.657971	0.596841	0.609971	0.162362	0.161212	0.212591	0.394854	0.245724	0.31431	0.49976	0.601115	0.567137	0.105386	0.153161	0.118553	0.199684	0.621594	0.178722	0.318296	0.556004	0.1257	0.0366174	0.0321798	0.0293371	0.0746447	0.0515864	0.0246762	0.118612	0.0655904	0.053022	0.118612	0.0688748	0.135065	0.0747095	0.0688748
LMNA_HUMAN	S107	0.0544207	0.0418619	0.0504892	0.123748	0.153096	0.126271	0.821831	0.805042	0.82324	0.0237356	0.00909023	0.00954775	0.083742	0.0130787	0.0549591	0.892522	0.977831	0.935493	0.0489239	0.134372	0.816704	0.0141245	0.0505933	0.935282	0.00642407	0.0162646	0.0101242	0.00832658	0.0355334	0.0426547	0.0347994	0.0837783	0.118578	0.118578	0.00458946	0.0205961	0.00941373	0.00458946
HNRPK_HUMAN	S284	0.156135	0.163094	0.144022	0.481823	0.401592	0.466089	0.362042	0.435314	0.38989	0.0721159	0.1135	0.0911611	0.66299	0.575216	0.466701	0.264894	0.311284	0.442137	0.154417	0.449835	0.395748	0.092259	0.568302	0.339439	0.0096516	0.0425136	0.0369857	0.0207139	0.0983266	0.0919146	0.062158	0.118468	0.0563098	0.118468	0.00923152	0.127938	0.38065	0.00923152
CTND1_HUMAN	S230	0.0662212	0.0568083	0.0295549	0.882171	0.784743	0.812312	0.0516081	0.158449	0.158133	0.0224548	0.0294194	0.0176851	0.947586	0.928242	0.958737	0.0299595	0.0423382	0.0235776	0.0508615	0.826409	0.12273	0.0231864	0.944855	0.0319584	0.0190428	0.0502202	0.0615935	0.00590125	0.0154297	0.0095387	0.0276751	0.118447	0.0907715	0.118447	0.0740026	0.017468	0.0651838	0.017468
K1C17_HUMAN	S13	0.0807596	0.0959784	0.0885583	0.0283318	0.0687165	0.0398675	0.890909	0.835305	0.871574	0.00401297	0.00705826	0.0123472	0.0201929	0.00334097	0.000898928	0.975794	0.989601	0.986754	0.0884321	0.0456386	0.865929	0.00780616	0.00814426	0.98405	0.00761018	0.0208017	0.0282283	0.00421717	0.0105056	0.00728976	0.0806259	0.0374943	0.11812	0.11812	8.81127e-05	0.0494768	0.00217172	8.81127e-05
PEBP1_HUMAN	S52	0.883633	0.802368	0.898673	0.0923117	0.185596	0.058702	0.0240556	0.0120359	0.0426255	0.987418	0.984339	0.965257	0.00871876	0.00724082	0.0174101	0.0038632	0.00841991	0.0173327	0.861558	0.112203	0.026239	0.979005	0.0111232	0.00987195	0.0518087	0.0657443	0.0154112	0.012005	0.00549454	0.00685117	0.117447	0.10108	0.016367	0.117447	0.0186963	0.0567603	0.168084	0.0186963
NIBL1_HUMAN	S692,S696	0.456592	0.358188	0.404908	0.367241	0.478593	0.304254	0.176167	0.163219	0.290838	0.44933	0.533907	0.468367	0.304765	0.254423	0.244407	0.245906	0.21167	0.287225	0.406563	0.383363	0.210075	0.483868	0.267865	0.248267	0.0492229	0.0882806	0.0702424	0.0443682	0.0323461	0.0378333	0.0773054	0.115497	0.0381921	0.115497	0.113428	0.100466	0.453641	0.100466
VDAC1_HUMAN	S104	0.0158558	0.0126261	0.1346	0.298253	0.269538	0.236993	0.685891	0.717836	0.628408	0.00304202	0.00241886	0.00288213	0.299844	0.193877	0.122412	0.697114	0.803704	0.874706	0.0543605	0.268261	0.677378	0.002781	0.205378	0.791841	0.0695079	0.0306501	0.0453179	0.000323654	0.0892735	0.0893884	0.0515795	0.0628832	0.114463	0.114463	0.268063	0.312785	0.119046	0.119046
PLEC_HUMAN	S4384orS4385orS4386	0.0544513	0.0652363	0.0631374	0.0685738	0.0651016	0.0585535	0.876975	0.869662	0.878309	0.0127818	0.00375244	0.00292984	0.00527633	0.00317662	0.00388574	0.981942	0.993071	0.993184	0.0609417	0.0640763	0.874982	0.00648802	0.0041129	0.989399	0.00571798	0.00508826	0.00465523	0.00546605	0.00106813	0.00645837	0.0544536	0.0599634	0.114417	0.114417	0.000283451	3.70575e-05	1.54602e-05	1.54602e-05
SRSF9_HUMAN	S211	0.0116984	0.0292661	0.0170205	0.513779	0.442103	0.461845	0.474522	0.528631	0.521135	0.0280902	0.0250914	0.0431911	0.647435	0.498037	0.573649	0.324475	0.476871	0.38316	0.0193283	0.472576	0.508096	0.0321242	0.57304	0.394835	0.00900835	0.0370233	0.0293161	0.00970074	0.0747006	0.0768661	0.0127959	0.100465	0.113261	0.113261	0.169412	0.105169	0.0756107	0.0756107
PLEC_HUMAN	S4622	0.0544513	0.0652363	0.0631374	0.0685738	0.0651016	0.0585535	0.876975	0.869662	0.878309	0.0050131	0.00350535	0.00299035	0.0125137	0.00997902	0.00564278	0.982473	0.986516	0.991367	0.0609417	0.0640763	0.874982	0.00383627	0.0093785	0.986785	0.00571798	0.00508826	0.00465523	0.0010512	0.0034746	0.00445297	0.0571054	0.0546978	0.111803	0.111803	7.00008e-05	0.000104378	7.29444e-06	7.29444e-06
MAP4_HUMAN	S280	0.821544	0.383945	0.910907	0.154149	0.256994	0.0848859	0.0243066	0.359061	0.00420746	0.76778	0.73873	0.785155	0.218709	0.240882	0.19571	0.0135114	0.0203885	0.0191356	0.705465	0.165343	0.129192	0.763888	0.218433	0.0176785	0.282007	0.0865984	0.199326	0.0234559	0.0225873	0.00366277	0.058423	0.0530903	0.111513	0.111513	0.738719	0.362264	0.387491	0.362264
UBP2L_HUMAN	S454	0.355638	0.3303	0.276621	0.597569	0.582516	0.614303	0.0467933	0.0871842	0.109076	0.23629	0.326776	0.254542	0.756859	0.669369	0.701154	0.00685173	0.00385565	0.0443044	0.320853	0.598129	0.0810177	0.272536	0.709127	0.0183373	0.0403466	0.0159011	0.0315958	0.0478516	0.0442867	0.0225381	0.0483173	0.110998	0.0626805	0.110998	0.252175	0.0150275	0.0489448	0.0150275
SYEP_HUMAN	S886	0.548362	0.631517	0.487709	0.402436	0.288208	0.380763	0.0492023	0.0802752	0.131528	0.670149	0.67969	0.647525	0.28198	0.269011	0.23821	0.0478712	0.0512995	0.114265	0.555863	0.357136	0.0870019	0.665788	0.263067	0.0711452	0.0721966	0.0606687	0.0415731	0.0165197	0.0224823	0.0373822	0.109925	0.0940687	0.0158567	0.109925	0.0619295	0.0654788	0.648989	0.0619295
AHNK_HUMAN	S93	0.179667	0.241946	0.177438	0.657971	0.596841	0.609971	0.162362	0.161212	0.212591	0.135843	0.143018	0.149355	0.576729	0.569228	0.560532	0.287428	0.287754	0.290114	0.199684	0.621594	0.178722	0.142738	0.56883	0.288432	0.0366174	0.0321798	0.0293371	0.00676007	0.00810616	0.00146568	0.0569453	0.0527646	0.10971	0.10971	0.0570518	0.0511649	0.00294144	0.00294144
SYEP_HUMAN	S882,S883	0.548362	0.631517	0.487709	0.402436	0.288208	0.380763	0.0492023	0.0802752	0.131528	0.672841	0.627684	0.693724	0.291283	0.330034	0.258117	0.0358759	0.0422818	0.0481588	0.555863	0.357136	0.0870019	0.66475	0.293145	0.0421055	0.0721966	0.0606687	0.0415731	0.0337552	0.0359946	0.00614332	0.108887	0.0639907	0.0448964	0.108887	0.0771221	0.191237	0.137923	0.0771221
F10A1_HUMAN	S75,S76	0.708057	0.707112	0.74808	0.209846	0.235742	0.194454	0.0820972	0.057146	0.0574658	0.800448	0.837768	0.84892	0.195208	0.158204	0.147159	0.004344	0.00402819	0.00392032	0.721083	0.213347	0.0655696	0.829045	0.166857	0.0040975	0.0233849	0.0208653	0.0143142	0.0253862	0.0251661	0.000220178	0.107963	0.0464904	0.0614721	0.107963	0.0056253	0.0694531	0.00174524	0.00174524
TOP2A_HUMAN	S1247	0.0885552	0.105375	0.0837369	0.0597757	0.147318	0.147008	0.851669	0.747307	0.769255	0.0160458	0.0104772	0.0131195	0.10546	0.0725751	0.0949809	0.878494	0.916948	0.8919	0.0925557	0.118034	0.78941	0.0132142	0.0910054	0.89578	0.0113601	0.0504535	0.0550232	0.00278548	0.0167992	0.0195184	0.0793415	0.0270287	0.10637	0.10637	0.000300238	0.428377	0.034325	0.000300238
PSMD2_HUMAN	S16	0.549241	0.427223	0.431908	0.343879	0.511909	0.353296	0.10688	0.0608676	0.214796	0.562998	0.615482	0.548945	0.40742	0.359428	0.402756	0.0295822	0.0250906	0.0482993	0.469458	0.403028	0.127514	0.575808	0.389868	0.034324	0.0691345	0.0944113	0.0790113	0.0350694	0.0264649	0.0123095	0.106351	0.0131602	0.0931903	0.106351	0.0763039	0.82758	0.113688	0.0763039
VIME_HUMAN	S73	0.0700346	0.0642325	0.0659609	0.0588276	0.0510676	0.0678462	0.871138	0.8847	0.866193	0.00969975	0.00875148	0.0100638	0.00979966	0.0049407	0.0162997	0.980501	0.986308	0.973637	0.0667427	0.0592471	0.87401	0.00950499	0.0103467	0.980148	0.00297898	0.00839716	0.00958199	0.000677465	0.00569922	0.00634297	0.0572377	0.0489004	0.106138	0.106138	5.37654e-06	0.00112671	8.92601e-05	5.37654e-06
UBP2L_HUMAN	S470	0.355638	0.3303	0.276621	0.597569	0.582516	0.614303	0.0467933	0.0871842	0.109076	0.318076	0.305406	0.360029	0.492662	0.519181	0.464671	0.189262	0.175413	0.1753	0.320853	0.598129	0.0810177	0.327837	0.492171	0.179992	0.0403466	0.0159011	0.0315958	0.0285899	0.0272582	0.00802883	0.00698371	0.105958	0.0989741	0.105958	0.818789	0.00435182	0.00626068	0.00435182
RBMX_HUMAN	S88	0.0403485	0.0488548	0.0624792	0.225071	0.196375	0.221772	0.73458	0.75477	0.715749	0.011184	0.0102494	0.010743	0.108631	0.199856	0.140272	0.880185	0.789894	0.848985	0.0505608	0.214406	0.735033	0.0107255	0.149586	0.839688	0.0111636	0.0157019	0.0195143	0.000467544	0.0463205	0.0458578	0.0398353	0.0648196	0.104655	0.104655	0.00349313	0.0833526	0.0220191	0.00349313
RALY_HUMAN	S288,T298	0.0904378	0.0525181	0.188875	0.288554	0.233529	0.177871	0.621008	0.713953	0.633253	0.0141562	0.0174845	0.00625636	0.263766	0.2348	0.182237	0.722078	0.747716	0.811507	0.11061	0.233318	0.656071	0.0126324	0.226934	0.760433	0.0703814	0.0553418	0.0504993	0.00576711	0.0413296	0.0460508	0.0979781	0.00638403	0.104362	0.104362	0.0741038	0.880571	0.0572875	0.0572875
RBMX_HUMAN	S329	0.0403485	0.0488548	0.0624792	0.225071	0.196375	0.221772	0.73458	0.75477	0.715749	0.00934289	0.0170782	0.0150096	0.403099	0.317545	0.233784	0.587558	0.665377	0.751206	0.0505608	0.214406	0.735033	0.0138102	0.318143	0.668047	0.0111636	0.0157019	0.0195143	0.0040047	0.0846593	0.081857	0.0367506	0.103737	0.0669861	0.103737	0.00581881	0.105214	0.240055	0.00581881
HMGA1_HUMAN	S102	0.0844785	0.0254897	0.0602696	0.118758	0.167684	0.106341	0.796763	0.806827	0.833389	0.016211	0.00942861	0.0108737	0.0991032	0.068814	0.0494671	0.884686	0.921757	0.939659	0.0567459	0.130928	0.812326	0.0121711	0.0724615	0.915367	0.0296518	0.0324315	0.0189225	0.00357251	0.0250183	0.0280382	0.0445748	0.0584663	0.103041	0.103041	0.0610015	0.0687744	0.00618614	0.00618614
CEBPZ_HUMAN	S629	0.0203489	0.0211596	0.0182082	0.415664	0.32305	0.248723	0.563987	0.65579	0.733069	0.121325	0.0899903	0.0653606	0.333218	0.348445	0.39739	0.545457	0.561565	0.537249	0.0199056	0.329146	0.650949	0.0922255	0.359684	0.54809	0.00152482	0.0836375	0.084645	0.0280493	0.0335301	0.01237	0.0723199	0.0305382	0.102858	0.102858	0.0111673	0.588735	0.10571	0.0111673
DKC1_HUMAN	S451,S453,S455	0.0804396	0.134869	0.103593	0.261226	0.214098	0.312916	0.658335	0.651033	0.583491	0.0753656	0.0834584	0.0847111	0.148992	0.218844	0.188496	0.775642	0.697698	0.726792	0.106301	0.262746	0.630953	0.0811784	0.185444	0.733378	0.0273155	0.0494268	0.0412652	0.00507282	0.0350258	0.0393873	0.0251223	0.0773024	0.102425	0.102425	0.192363	0.0916054	0.0358757	0.0358757
CTNA1_HUMAN	T634	0.211964	0.196607	0.153125	0.602879	0.481554	0.645282	0.185157	0.321839	0.201593	0.253275	0.347009	0.261497	0.590639	0.425412	0.463914	0.156085	0.227579	0.27459	0.187232	0.576572	0.236196	0.28726	0.493322	0.219418	0.0305191	0.0849749	0.0746226	0.051907	0.0864501	0.0596721	0.100029	0.0832501	0.0167784	0.100029	0.0451354	0.300018	0.776177	0.0451354
THOC2_HUMAN	S1417	0.0136558	0.0193793	0.0158898	0.471319	0.369569	0.464368	0.515025	0.611051	0.519742	0.0785441	0.0763336	0.105749	0.422051	0.468113	0.50113	0.499405	0.455553	0.393121	0.0163083	0.435085	0.548606	0.0868756	0.463765	0.44936	0.00288461	0.056845	0.0541305	0.0163822	0.0397183	0.0534118	0.0705673	0.0286793	0.0992465	0.0992465	0.00182684	0.513391	0.0866339	0.00182684
TR150_HUMAN	S243,S248	0.197341	0.0148435	0.0579702	0.583983	0.754805	0.669563	0.218675	0.230352	0.272467	0.0536692	0.0216983	0.0357202	0.670493	0.616862	0.587517	0.275838	0.361439	0.376763	0.0900517	0.66945	0.240498	0.0370292	0.624957	0.338013	0.095385	0.0854108	0.0282949	0.0160256	0.0420762	0.054388	0.0530225	0.044493	0.0975155	0.0975155	0.396132	0.463686	0.0511123	0.0511123
LMNA_HUMAN	S390	0.0544207	0.0418619	0.0504892	0.123748	0.153096	0.126271	0.821831	0.805042	0.82324	0.00028408	0.00029133	0.000316896	0.0978709	0.0651617	0.0935661	0.901845	0.934547	0.906117	0.0489239	0.134372	0.816704	0.000297435	0.0855329	0.91417	0.00642407	0.0162646	0.0101242	1.72392e-05	0.0177728	0.017776	0.0486265	0.0488387	0.0974652	0.0974652	0.000195436	0.0246447	0.00117629	0.000195436
K2C8_HUMAN	S334	0.193798	0.132024	0.159945	0.0962405	0.0889737	0.0786931	0.709961	0.779003	0.761362	0.19312	0.0852483	0.144529	0.00678669	0.00692844	0.0212582	0.800093	0.907823	0.834213	0.161922	0.0879691	0.750109	0.140966	0.0116578	0.847376	0.0309347	0.00881677	0.03587	0.0540243	0.00831454	0.0550583	0.0209562	0.0763113	0.0972675	0.0972675	0.59115	0.000401278	0.0623869	0.000401278
PUR6_HUMAN	S27	0.819689	0.812624	0.893147	0.0636445	0.0960485	0.0337021	0.116667	0.0913273	0.0731513	0.97008	0.926736	0.91846	0.0208623	0.0529707	0.0704969	0.00905784	0.0202929	0.0110432	0.84182	0.064465	0.0937151	0.938425	0.04811	0.0134646	0.0445904	0.0311813	0.0218558	0.0277241	0.0251717	0.00599621	0.0966055	0.016355	0.0802505	0.0966055	0.0333191	0.518638	0.00358191	0.00358191
EF1B_HUMAN	S106	0.0624403	0.127183	0.129351	0.640472	0.867344	0.841914	0.297087	0.00547268	0.0287351	0.156809	0.157563	0.144902	0.829058	0.835927	0.833633	0.0141328	0.0065106	0.0214657	0.106325	0.783244	0.110432	0.153091	0.832872	0.0140364	0.0380205	0.124295	0.162066	0.00710235	0.00349703	0.00747803	0.0467663	0.0496289	0.0963953	0.0963953	0.104329	0.527403	0.361585	0.104329
PLEC_HUMAN	S4386	0.0544513	0.0652363	0.0631374	0.0685738	0.0651016	0.0585535	0.876975	0.869662	0.878309	0.0121058	0.016924	0.0154724	0.0111082	0.0107035	0.0199799	0.976786	0.972372	0.964548	0.0609417	0.0640763	0.874982	0.0148341	0.0139305	0.971235	0.00571798	0.00508826	0.00465523	0.00247172	0.00524279	0.00619789	0.0461076	0.0501457	0.0962534	0.0962534	0.000213389	0.000286729	2.76404e-05	2.76404e-05
K2C8_HUMAN	S258	0.193798	0.132024	0.159945	0.0962405	0.0889737	0.0786931	0.709961	0.779003	0.761362	0.216284	0.0913417	0.0174084	0.0854258	0.0374618	0.0149787	0.69829	0.871196	0.967613	0.161922	0.0879691	0.750109	0.108345	0.0459554	0.8457	0.0309347	0.00881677	0.03587	0.100522	0.0359834	0.13646	0.0535775	0.0420137	0.0955911	0.0955911	0.427431	0.120969	0.305718	0.120969
BZW2_HUMAN	S412,S414	0.237143	0.546473	0.380411	0.6336	0.342696	0.485631	0.129258	0.110831	0.133958	0.362372	0.354118	0.248446	0.537212	0.576532	0.6344	0.100416	0.0693498	0.117155	0.388009	0.487309	0.124683	0.321645	0.582715	0.0956401	0.154805	0.145459	0.0122235	0.0635271	0.0488879	0.0242576	0.0663634	0.0954059	0.0290424	0.0954059	0.529884	0.342161	0.137691	0.137691
ILF3_HUMAN	S382	0.223054	0.23328	0.152427	0.345685	0.279353	0.273585	0.431261	0.487367	0.573988	0.238969	0.230032	0.188858	0.378946	0.389414	0.366473	0.382085	0.380554	0.444669	0.202921	0.299541	0.497538	0.219286	0.378277	0.402436	0.0440264	0.0400656	0.0719049	0.0267277	0.0114851	0.0365828	0.0163658	0.0787363	0.0951021	0.0951021	0.611356	0.0307307	0.110721	0.0307307
AIFM1_HUMAN	S268	0.0903141	0.0315008	0.122563	0.862227	0.937596	0.857889	0.0474592	0.0309031	0.019548	0.00135564	0.0020693	0.00978597	0.986385	0.971468	0.983454	0.0122597	0.0264627	0.00676032	0.0814593	0.885904	0.0326367	0.00440364	0.980435	0.0151609	0.0461723	0.0448192	0.0140361	0.00467487	0.0079031	0.0101665	0.0770556	0.0945315	0.0174758	0.0945315	0.0452007	0.0228049	0.155651	0.0228049
HNRPC_HUMAN	S260	0.04013	0.040455	0.0546913	0.240388	0.182293	0.179797	0.719482	0.777252	0.765512	0.0202588	0.000751588	0.0149	0.223185	0.0139763	0.18144	0.756556	0.985272	0.80366	0.0450921	0.200826	0.754082	0.0119701	0.139534	0.848496	0.00831472	0.0342843	0.0305338	0.0100782	0.110721	0.12077	0.033122	0.0612922	0.0944142	0.0944142	0.0117744	0.411535	0.259517	0.0117744
LYRIC_HUMAN	S426	0.0137656	0.0143237	0.055821	0.78533	0.854467	0.723206	0.200905	0.131209	0.220973	0.0574944	0.0616974	0.0462586	0.863085	0.85546	0.845654	0.0794207	0.0828429	0.108087	0.0279701	0.787668	0.184362	0.0551501	0.854733	0.090117	0.0241212	0.0656621	0.0471131	0.00798192	0.0087382	0.0156566	0.02718	0.0670652	0.0942453	0.0942453	0.13753	0.154365	0.0302724	0.0302724
SRS11_HUMAN	S434	0.259147	0.195643	0.270378	0.60638	0.639307	0.500983	0.134473	0.165049	0.228639	0.278496	0.203239	0.210439	0.642016	0.666657	0.720367	0.0794876	0.130104	0.0691946	0.241723	0.582223	0.176054	0.230725	0.676347	0.0929287	0.0402993	0.072257	0.0480378	0.0415276	0.0400638	0.0326035	0.0109981	0.0941233	0.0831252	0.0941233	0.758526	0.119732	0.0682168	0.0682168
AKA12_HUMAN	S627	0.799947	0.767826	0.802956	0.151669	0.206276	0.181434	0.0483841	0.0258975	0.0156096	0.729482	0.765899	0.597165	0.218239	0.181349	0.3504	0.052279	0.0527514	0.0524348	0.790243	0.179793	0.0299637	0.697515	0.249996	0.0524884	0.0194717	0.0273406	0.0167614	0.0887931	0.0888872	0.000240707	0.0927276	0.0702029	0.0225246	0.0927276	0.152003	0.261126	0.0804843	0.0804843
NUCL_HUMAN	S145,S153	0.307142	0.325732	0.280563	0.559793	0.519394	0.559315	0.133065	0.154874	0.160122	0.427417	0.323263	0.359246	0.395419	0.533844	0.432926	0.177164	0.142894	0.207828	0.304479	0.546167	0.149354	0.369975	0.454063	0.175962	0.022702	0.0231874	0.0143486	0.0528995	0.0715921	0.0324836	0.0654963	0.0921047	0.0266083	0.0921047	0.120074	0.101353	0.264135	0.101353
DEK_HUMAN	S227,S230,S231,S232	0.0198095	0.156096	0.0195096	0.264214	0.264035	0.337377	0.715976	0.57987	0.643113	0.00480356	0.010373	0.0181151	0.408209	0.369999	0.359949	0.586987	0.619628	0.621936	0.0651382	0.288542	0.64632	0.0110972	0.379386	0.609517	0.0787715	0.0422927	0.06811	0.00668528	0.0254627	0.0195455	0.054041	0.0908439	0.0368029	0.0908439	0.30196	0.0333011	0.419196	0.0333011
VIME_HUMAN	S325	0.0700346	0.0642325	0.0659609	0.0588276	0.0510676	0.0678462	0.871138	0.8847	0.866193	0.0044718	0.0253803	0.0122497	0.00896823	0.029464	0.0249321	0.98656	0.945156	0.962818	0.0667427	0.0592471	0.87401	0.0140339	0.0211214	0.964845	0.00297898	0.00839716	0.00958199	0.0105678	0.0107662	0.0207764	0.0527087	0.0381257	0.0908344	0.0908344	0.00114281	0.0084216	0.00234325	0.00114281
UBP2L_HUMAN	S605,S609	0.355638	0.3303	0.276621	0.597569	0.582516	0.614303	0.0467933	0.0871842	0.109076	0.330546	0.522249	0.380609	0.650886	0.437632	0.582549	0.0185686	0.0401198	0.0368427	0.320853	0.598129	0.0810177	0.411134	0.557022	0.0318437	0.0403466	0.0159011	0.0315958	0.0994302	0.108895	0.0116127	0.0902813	0.0411073	0.049174	0.0902813	0.218774	0.552899	0.0646517	0.0646517
NOP2_HUMAN	S67	0.126592	0.070557	0.0949606	0.431019	0.383467	0.241855	0.44239	0.545976	0.663184	0.120114	0.101519	0.132104	0.428497	0.375903	0.460633	0.451389	0.522578	0.407263	0.0973697	0.352114	0.550517	0.117912	0.421678	0.46041	0.0280949	0.0984024	0.110467	0.0154109	0.0427745	0.0581843	0.0205426	0.0695641	0.0901067	0.0901067	0.329087	0.324304	0.279434	0.279434
CTND1_HUMAN	S349	0.0662212	0.0568083	0.0295549	0.882171	0.784743	0.812312	0.0516081	0.158449	0.158133	0.0345442	0.0496976	0.0371485	0.934006	0.894109	0.92101	0.0314495	0.0561934	0.0418415	0.0508615	0.826409	0.12273	0.0404634	0.916375	0.0431615	0.0190428	0.0502202	0.0615935	0.00810232	0.0203485	0.0124247	0.0103981	0.0899665	0.0795684	0.0899665	0.433266	0.0452052	0.0933435	0.0452052
KI67_HUMAN	S357	0.124477	0.250574	0.319095	0.75504	0.675504	0.561825	0.120484	0.0739217	0.11908	0.14022	0.164457	0.12177	0.735279	0.673448	0.74459	0.124501	0.162095	0.133641	0.231382	0.664123	0.104495	0.142149	0.717772	0.140079	0.0987183	0.0971087	0.0264867	0.0214089	0.0386674	0.0196067	0.0892327	0.0536489	0.0355838	0.0892327	0.200746	0.424232	0.134789	0.134789
AHNK_HUMAN	S5745,S5746	0.179667	0.241946	0.177438	0.657971	0.596841	0.609971	0.162362	0.161212	0.212591	0.108128	0.105282	0.118681	0.740258	0.662229	0.721371	0.151614	0.23249	0.159948	0.199684	0.621594	0.178722	0.110697	0.707953	0.18135	0.0366174	0.0321798	0.0293371	0.00705919	0.0407085	0.0444834	0.0889869	0.0863582	0.00262865	0.0889869	0.0144575	0.0449003	0.936015	0.0144575
SPTB2_HUMAN	S2102	0.124992	0.205115	0.111013	0.21376	0.141521	0.16803	0.661248	0.653364	0.720956	0.198899	0.211433	0.153159	0.290077	0.15891	0.218498	0.511024	0.629657	0.628343	0.14704	0.174437	0.678523	0.18783	0.222495	0.589675	0.0507778	0.0365433	0.0369594	0.0306735	0.0656746	0.0681166	0.0407898	0.0480583	0.0888481	0.0888481	0.29952	0.330174	0.118025	0.118025
NUCL_HUMAN	S563	0.307142	0.325732	0.280563	0.559793	0.519394	0.559315	0.133065	0.154874	0.160122	0.392172	0.466855	0.320801	0.517969	0.414904	0.559483	0.0898586	0.118241	0.119717	0.304479	0.546167	0.149354	0.393276	0.497452	0.109272	0.022702	0.0231874	0.0143486	0.0730333	0.0744409	0.0168288	0.088797	0.0487155	0.0400815	0.088797	0.11467	0.340043	0.0348769	0.0348769
CH60_HUMAN	S70	0.104548	0.116986	0.117698	0.842144	0.829473	0.829383	0.0533081	0.0535411	0.0529196	0.0489554	0.0625817	0.114145	0.94933	0.934954	0.882668	0.0017143	0.00246396	0.00318721	0.113077	0.833666	0.0532563	0.0752272	0.922318	0.00245516	0.00739495	0.00734164	0.000313978	0.0343851	0.0350817	0.000736497	0.0378501	0.0886512	0.0508011	0.0886512	0.135775	0.0128061	4.11061e-08	4.11061e-08
TOP2A_HUMAN	S1106	0.0885552	0.105375	0.0837369	0.0597757	0.147318	0.147008	0.851669	0.747307	0.769255	0.0139992	0.0205967	0.015678	0.124521	0.0973731	0.0950947	0.86148	0.88203	0.889227	0.0925557	0.118034	0.78941	0.016758	0.105663	0.877579	0.0113601	0.0504535	0.0550232	0.00342881	0.0163714	0.0143994	0.0757977	0.012371	0.0881687	0.0881687	0.000379541	0.706908	0.0549421	0.000379541
RBM39_HUMAN	S97	0.0829287	0.153112	0.148183	0.828502	0.749988	0.728103	0.0885696	0.0969001	0.123714	0.0546249	0.0679847	0.051964	0.875232	0.843129	0.85238	0.0701434	0.0888862	0.0956561	0.128075	0.768864	0.103061	0.0581912	0.856914	0.0848952	0.0391753	0.0527943	0.0183644	0.00858512	0.0165245	0.0132163	0.0698836	0.0880496	0.018166	0.0880496	0.0392353	0.0510164	0.236702	0.0392353
MBB1A_HUMAN	S1163	0.134767	0.151992	0.138739	0.455486	0.492445	0.49943	0.409748	0.355563	0.361831	0.157596	0.131194	0.230896	0.431398	0.392292	0.360453	0.411006	0.476514	0.408651	0.141832	0.482454	0.375714	0.173229	0.394714	0.432057	0.00901963	0.0236146	0.0296402	0.0516567	0.0355347	0.0385187	0.0313963	0.0877394	0.0563431	0.0877394	0.358296	0.0235469	0.115076	0.0235469
AKA12_HUMAN	S629	0.799947	0.767826	0.802956	0.151669	0.206276	0.181434	0.0483841	0.0258975	0.0156096	0.886173	0.86575	0.879457	0.0851381	0.106749	0.101598	0.0286889	0.0275004	0.0189449	0.790243	0.179793	0.0299637	0.877127	0.0978283	0.0250448	0.0194717	0.0273406	0.0167614	0.0104088	0.0112879	0.00531593	0.0868839	0.081965	0.00491899	0.0868839	0.00242212	0.00865077	0.65335	0.00242212
STMN1_HUMAN	S16,S25	0.872054	0.901322	0.925755	0.0673841	0.0448988	0.0399788	0.0605615	0.0537787	0.0342664	0.986498	0.983862	0.989244	0.0120266	0.013989	0.00933305	0.00147527	0.0021487	0.00142337	0.899711	0.0507539	0.0495355	0.986535	0.0117829	0.00168245	0.0268864	0.0146107	0.0136514	0.00269081	0.00233751	0.000404619	0.0868241	0.038971	0.0478531	0.0868241	0.00510508	0.0103242	0.00372351	0.00372351
ACLY_HUMAN	S455	0.866909	0.878104	0.906941	0.0658744	0.0696409	0.0531648	0.0672169	0.0522549	0.0398941	0.970548	0.970901	0.970907	0.0248551	0.0224368	0.0201268	0.00459678	0.00666173	0.00896577	0.883985	0.0628934	0.0531219	0.970786	0.0224729	0.00674143	0.0206539	0.00863311	0.013682	0.000205735	0.00236434	0.00218559	0.086801	0.0404205	0.0463805	0.086801	0.00189296	0.00144241	0.00440032	0.00144241
SEPT9_HUMAN	S85	0.320479	0.427545	0.343868	0.479563	0.416483	0.532297	0.199958	0.155972	0.123835	0.372129	0.329018	0.381223	0.580784	0.592713	0.51473	0.0470872	0.078269	0.104047	0.363964	0.476114	0.159921	0.36079	0.562742	0.0764676	0.0562909	0.0579838	0.0382149	0.0278889	0.0420058	0.0285225	0.00317422	0.086628	0.0834538	0.086628	0.934466	0.104172	0.0387333	0.0387333
K1C17_HUMAN	S32	0.0807596	0.0959784	0.0885583	0.0283318	0.0687165	0.0398675	0.890909	0.835305	0.871574	0.157547	0.207301	0.160305	0.0677719	0.0316612	0.0155314	0.774681	0.761038	0.824164	0.0884321	0.0456386	0.865929	0.175051	0.0383215	0.786628	0.00761018	0.0208017	0.0282283	0.0279631	0.0267496	0.0332152	0.0866188	0.00731711	0.0793017	0.0866188	0.00662034	0.727378	0.0344789	0.00662034
LMNA_HUMAN	S392	0.0544207	0.0418619	0.0504892	0.123748	0.153096	0.126271	0.821831	0.805042	0.82324	0.00347088	0.000113401	0.00240316	0.0998042	0.0815688	0.10293	0.896725	0.918318	0.894667	0.0489239	0.134372	0.816704	0.00199581	0.0947675	0.903237	0.00642407	0.0162646	0.0101242	0.00171541	0.0115368	0.0131011	0.0469281	0.0396041	0.0865322	0.0865322	0.000257106	0.0262936	0.000825294	0.000257106
LAP2A_HUMAN	T164	0.113531	0.115979	0.0526426	0.716413	0.664241	0.831119	0.170056	0.21978	0.116238	0.0058633	0.0146662	0.003487	0.705726	0.722763	0.793465	0.288411	0.262571	0.203048	0.0940508	0.737258	0.168692	0.00800551	0.740651	0.251343	0.0358815	0.0853696	0.0517844	0.00588944	0.0465244	0.0437748	0.0860453	0.00339361	0.0826517	0.0860453	0.014869	0.954691	0.102349	0.014869
TBA1A_HUMAN	T41	0.66211	0.575801	0.246067	0.13869	0.217976	0.109741	0.1992	0.206223	0.644193	0.491328	0.652831	0.578417	0.225862	0.090446	0.168413	0.282809	0.256723	0.25317	0.494659	0.155469	0.349872	0.574192	0.161574	0.264234	0.21957	0.0560347	0.254914	0.0808342	0.0679668	0.0161843	0.0795327	0.00610499	0.0856377	0.0856377	0.587668	0.910238	0.592582	0.587668
VIME_HUMAN	S430	0.0700346	0.0642325	0.0659609	0.0588276	0.0510676	0.0678462	0.871138	0.8847	0.866193	0.00209948	0.0121827	0.0399087	0.0290751	0.0209012	0.0172201	0.968825	0.966916	0.942871	0.0667427	0.0592471	0.87401	0.0180637	0.0223988	0.959538	0.00297898	0.00839716	0.00958199	0.0195787	0.00606774	0.014465	0.048679	0.0368483	0.0855273	0.0855273	0.0130802	0.00352368	0.0010329	0.0010329
UBP2L_HUMAN	S453	0.355638	0.3303	0.276621	0.597569	0.582516	0.614303	0.0467933	0.0871842	0.109076	0.448914	0.395515	0.372826	0.518771	0.548021	0.557156	0.0323145	0.0564632	0.0700185	0.320853	0.598129	0.0810177	0.405752	0.541316	0.0529321	0.0403466	0.0159011	0.0315958	0.0390633	0.0200514	0.0190984	0.0848988	0.0568131	0.0280856	0.0848988	0.0588947	0.0183775	0.258031	0.0183775
RL1D1_HUMAN	S361	0.142033	0.129884	0.213015	0.282348	0.277899	0.213076	0.575619	0.592217	0.57391	0.0920347	0.0710933	0.0684168	0.292957	0.344194	0.338513	0.615008	0.584713	0.59307	0.161644	0.257774	0.580582	0.0771816	0.325221	0.597597	0.0449011	0.038774	0.0101126	0.0129326	0.0280859	0.015647	0.0844622	0.0674472	0.017015	0.0844622	0.0351568	0.0712061	0.188842	0.0351568
NOP56_HUMAN	S520	0.114103	0.115042	0.0471083	0.126253	0.159806	0.112399	0.759643	0.725152	0.840492	0.0237763	0.0314528	0.0227155	0.124071	0.109739	0.11084	0.852153	0.858808	0.866445	0.0920844	0.13282	0.775096	0.0259815	0.114883	0.859135	0.0389532	0.0243761	0.0592026	0.00476786	0.00797569	0.00715142	0.0661029	0.0179365	0.0840393	0.0840393	0.0433524	0.29245	0.0711362	0.0433524
HNRPD_HUMAN	S83	0.123328	0.206458	0.12144	0.763179	0.660113	0.717951	0.113493	0.133429	0.160609	0.287747	0.206849	0.201094	0.655856	0.710108	0.680739	0.0563975	0.0830433	0.118166	0.150409	0.713748	0.135844	0.231897	0.682234	0.085869	0.0485496	0.0516617	0.0236507	0.048453	0.0271567	0.0309812	0.0814879	0.0315134	0.0499745	0.0814879	0.108734	0.402628	0.0905351	0.0905351
MCM2_HUMAN	S27	0.723715	0.754293	0.811743	0.218273	0.143012	0.120942	0.0580124	0.102695	0.067315	0.843059	0.834221	0.851228	0.122605	0.126451	0.113257	0.0343366	0.039328	0.0355149	0.76325	0.160742	0.0760074	0.842836	0.120771	0.0363932	0.0446923	0.0510302	0.0235753	0.00850561	0.00678539	0.00260903	0.0795856	0.0399715	0.0396142	0.0795856	0.038782	0.249863	0.0444401	0.038782
LAP2B_HUMAN	Y183,S184	0.0995729	0.0731761	0.0643384	0.730149	0.721259	0.68781	0.170278	0.205565	0.247851	0.0430485	0.047685	0.0418262	0.800111	0.747	0.830112	0.156841	0.205315	0.128061	0.0790291	0.713073	0.207898	0.0441866	0.792408	0.163406	0.018332	0.0223249	0.0388391	0.00309078	0.0420883	0.039043	0.0348425	0.079335	0.0444925	0.079335	0.0314887	0.0448223	0.234284	0.0314887
EF1D_HUMAN	S133	0.186648	0.1983	0.165302	0.787761	0.785117	0.759819	0.0255915	0.0165827	0.0748793	0.146418	0.180601	0.154394	0.737134	0.690702	0.73575	0.116448	0.128698	0.109856	0.183417	0.777566	0.0390178	0.160471	0.721195	0.118334	0.0167348	0.0154258	0.0313819	0.0178833	0.0264172	0.00956119	0.0229456	0.0563705	0.079316	0.079316	0.179978	0.033164	0.0138331	0.0138331
HMGA1_HUMAN	S36	0.0844785	0.0254897	0.0602696	0.118758	0.167684	0.106341	0.796763	0.806827	0.833389	0.000766184	0.00145462	0.00128065	0.105416	0.0772201	0.138996	0.893818	0.921325	0.859723	0.0567459	0.130928	0.812326	0.00116715	0.107211	0.891622	0.0296518	0.0324315	0.0189225	0.000357976	0.0309273	0.0308599	0.0555788	0.0237171	0.0792958	0.0792958	0.0314862	0.411188	0.0192007	0.0192007
SPTN1_HUMAN	S1190	0.121983	0.156864	0.132424	0.165865	0.174971	0.141282	0.712152	0.668165	0.726294	0.223372	0.180251	0.244577	0.187141	0.192924	0.093805	0.589488	0.626825	0.661618	0.13709	0.160706	0.702204	0.216066	0.157956	0.625977	0.0179029	0.017427	0.0303146	0.0327791	0.0556319	0.0360727	0.078976	0.00274938	0.0762266	0.078976	0.0215339	0.938821	0.0487118	0.0215339
TIF1B_HUMAN	S473	0.397438	0.423991	0.410606	0.532825	0.510525	0.506649	0.069737	0.0654844	0.0827446	0.480788	0.506722	0.480092	0.494499	0.466553	0.516515	0.0247128	0.0267259	0.00339286	0.410678	0.516666	0.0726553	0.489201	0.492522	0.0182772	0.0132768	0.0141276	0.00899259	0.0151775	0.0250398	0.0129294	0.0785225	0.0241443	0.0543782	0.0785225	0.00251896	0.219476	0.00392948	0.00251896
LAP2B_HUMAN	S159,T160	0.0995729	0.0731761	0.0643384	0.730149	0.721259	0.68781	0.170278	0.205565	0.247851	0.00130101	0.0015354	0.0013096	0.819702	0.676087	0.740645	0.178997	0.322378	0.258046	0.0790291	0.713073	0.207898	0.001382	0.745478	0.25314	0.018332	0.0223249	0.0388391	0.000132915	0.0719294	0.0718161	0.0776471	0.032405	0.0452421	0.0776471	0.00183789	0.497534	0.39152	0.00183789
HS105_HUMAN	S809	0.755172	0.766454	0.861888	0.153855	0.120959	0.106762	0.0909729	0.112587	0.0313505	0.88199	0.836684	0.869406	0.117178	0.162217	0.129021	0.000831289	0.00109897	0.00157283	0.794505	0.127192	0.0783035	0.862693	0.136139	0.0011677	0.0586275	0.0241576	0.0420741	0.0233871	0.0233477	0.000375518	0.0681887	0.00894708	0.0771358	0.0771358	0.134654	0.668574	0.0336864	0.0336864
MCM2_HUMAN	S26	0.723715	0.754293	0.811743	0.218273	0.143012	0.120942	0.0580124	0.102695	0.067315	0.844789	0.843842	0.83206	0.0738355	0.128251	0.146454	0.0813754	0.0279064	0.0214859	0.76325	0.160742	0.0760074	0.840231	0.11618	0.0435892	0.0446923	0.0510302	0.0235753	0.00709148	0.0377841	0.0328809	0.0769801	0.044562	0.0324181	0.0769801	0.0421154	0.290984	0.237498	0.0421154
TR150_HUMAN	S379	0.197341	0.0148435	0.0579702	0.583983	0.754805	0.669563	0.218675	0.230352	0.272467	0.117763	0.074141	0.0972986	0.597739	0.619727	0.560302	0.284498	0.306132	0.3424	0.0900517	0.66945	0.240498	0.096401	0.592589	0.31101	0.095385	0.0854108	0.0282949	0.021825	0.0300454	0.0292574	0.00634924	0.0768613	0.0705121	0.0768613	0.91593	0.215417	0.0399163	0.0399163
TCPA_HUMAN	S544	0.458605	0.53727	0.512581	0.456825	0.350382	0.370641	0.08457	0.112349	0.116778	0.490234	0.706753	0.457857	0.473232	0.257557	0.52977	0.036534	0.0356898	0.0123731	0.502819	0.392616	0.104566	0.551615	0.420186	0.028199	0.0402306	0.0565217	0.0174577	0.135325	0.14365	0.0137121	0.048796	0.0275706	0.0763666	0.0763666	0.581656	0.772503	0.00398271	0.00398271
RALY_HUMAN	S135	0.0904378	0.0525181	0.188875	0.288554	0.233529	0.177871	0.621008	0.713953	0.633253	0.0278275	0.0404863	0.0350609	0.354358	0.230063	0.2596	0.617815	0.729451	0.705339	0.11061	0.233318	0.656071	0.0344583	0.28134	0.684201	0.0703814	0.0553418	0.0504993	0.00635088	0.0649367	0.0587431	0.0761522	0.048022	0.0281302	0.0761522	0.135381	0.384823	0.563505	0.135381
TRA2B_HUMAN	S264orS266orY268orY269orS270,S264orS266orY268orY269orS270,S264orS266orY268orY269orS270	0.0917363	0.0214143	0.0273044	0.462921	0.328393	0.510439	0.445343	0.650193	0.462256	0.0375593	0.0252552	0.0422622	0.365206	0.410777	0.334274	0.597235	0.563967	0.623464	0.0468184	0.433918	0.519264	0.0350256	0.370086	0.594889	0.0390114	0.0944253	0.113703	0.00878205	0.0384844	0.0298175	0.0117928	0.0638317	0.0756245	0.0756245	0.636391	0.339226	0.327578	0.327578
MPRI_HUMAN	S2409	0.0101685	0.0245521	0.0112097	0.911017	0.952762	0.818487	0.0788146	0.0226858	0.170303	0.080537	0.0887213	0.0877736	0.911116	0.894529	0.888914	0.00834657	0.01675	0.023312	0.0153101	0.894089	0.0906012	0.0856773	0.898186	0.0161362	0.00802071	0.0687196	0.0745113	0.00447678	0.0115441	0.00750157	0.0703672	0.00409781	0.0744651	0.0744651	0.000186453	0.923772	0.160124	0.000186453
HMGA1_HUMAN	S99,S102	0.0844785	0.0254897	0.0602696	0.118758	0.167684	0.106341	0.796763	0.806827	0.833389	0.0153507	0.0110708	0.00894653	0.128186	0.0833569	0.0944485	0.856463	0.905572	0.896605	0.0567459	0.130928	0.812326	0.0117893	0.101997	0.886214	0.0296518	0.0324315	0.0189225	0.00326198	0.0233484	0.0261516	0.0449566	0.0289306	0.0738872	0.0738872	0.0594013	0.27815	0.0166131	0.0166131
CBX5_HUMAN	S11,S12,S13,S14	0.0238558	0.0365518	0.00613118	0.594483	0.55175	0.506182	0.381661	0.411698	0.487687	0.0295836	0.0338174	0.0314106	0.644301	0.640619	0.559882	0.326116	0.325564	0.408707	0.0221796	0.550805	0.427015	0.0316039	0.614934	0.353462	0.0152794	0.0441581	0.0546473	0.00212354	0.0477118	0.0478444	0.00942427	0.0641288	0.0735531	0.0735531	0.349656	0.162714	0.154291	0.154291
TMX1_HUMAN	S247	0.0106966	0.0154168	0.00743123	0.898362	0.87247	0.909566	0.0909411	0.112113	0.0830027	0.0135338	0.0164899	0.0204047	0.973129	0.954916	0.953816	0.0133368	0.0285938	0.0257791	0.0111816	0.893466	0.0953523	0.0168095	0.960621	0.0225699	0.00401483	0.0190266	0.0150482	0.00344661	0.0108469	0.00811902	0.00562789	0.0671545	0.0727824	0.0727824	0.139239	0.00604258	0.0018038	0.0018038
NP1L4_HUMAN	S121	0.80023	0.712291	0.776073	0.162437	0.178943	0.134617	0.037333	0.108765	0.0893105	0.715213	0.712747	0.71428	0.242273	0.217892	0.232789	0.0425133	0.069361	0.0529301	0.762865	0.158666	0.0784696	0.71408	0.230985	0.0549348	0.0454326	0.0224027	0.0369295	0.00124554	0.0122902	0.0135356	0.0487845	0.0723193	0.0235348	0.0723193	0.136537	0.0080319	0.358558	0.0080319
RBMX_HUMAN	Y327	0.0403485	0.0488548	0.0624792	0.225071	0.196375	0.221772	0.73458	0.75477	0.715749	0.0215767	0.0409146	0.052834	0.311411	0.237216	0.310011	0.667012	0.721869	0.637155	0.0505608	0.214406	0.735033	0.0384417	0.286213	0.675345	0.0111636	0.0157019	0.0195143	0.0157747	0.0424381	0.0429675	0.0121191	0.0718068	0.0596878	0.0718068	0.338474	0.051449	0.0936181	0.051449
RL1D1_HUMAN	T358	0.142033	0.129884	0.213015	0.282348	0.277899	0.213076	0.575619	0.592217	0.57391	0.145908	0.152971	0.118335	0.286151	0.362619	0.33838	0.567941	0.484409	0.543285	0.161644	0.257774	0.580582	0.139072	0.32905	0.531878	0.0449011	0.038774	0.0101126	0.0183021	0.0390783	0.042918	0.0225723	0.0712759	0.0487036	0.0712759	0.465268	0.0883707	0.128279	0.0883707
TOP2B_HUMAN	S1400,S1413,S1424	0.0603819	0.0148618	0.0334855	0.164389	0.148083	0.491282	0.775229	0.837055	0.475233	0.00910048	0.00555132	0.00524848	0.307715	0.175406	0.195678	0.683184	0.819043	0.799074	0.0362431	0.267918	0.695839	0.00663342	0.226266	0.7671	0.022885	0.193611	0.193536	0.00214189	0.0712614	0.0733561	0.0296096	0.0416515	0.0712611	0.0712611	0.0894865	0.744211	0.583049	0.0894865
SAFB1_HUMAN	S601	0.0641621	0.056112	0.096142	0.445828	0.270423	0.29234	0.49001	0.673465	0.611518	0.00100421	0.00106623	0.00179307	0.603039	0.318361	0.223824	0.395957	0.680573	0.774383	0.0721387	0.336197	0.591665	0.00128783	0.381741	0.616971	0.0211736	0.0955734	0.0933249	0.000438642	0.197393	0.197067	0.0708508	0.0455445	0.0253063	0.0708508	0.0044098	0.737262	0.850492	0.0044098
NOLC1_HUMAN	S698	0.205708	0.314286	0.231727	0.415811	0.310981	0.364141	0.378481	0.374733	0.404132	0.226159	0.215929	0.22239	0.349748	0.303854	0.312554	0.424093	0.480217	0.465056	0.250573	0.363644	0.385782	0.221493	0.322052	0.456455	0.0566896	0.052417	0.0160016	0.00517352	0.0243765	0.0290333	0.0290807	0.0415924	0.0706731	0.0706731	0.426231	0.280693	0.020973	0.020973
RBMX_HUMAN	T216	0.0403485	0.0488548	0.0624792	0.225071	0.196375	0.221772	0.73458	0.75477	0.715749	0.0761018	0.0745683	0.0666913	0.268109	0.255874	0.260208	0.655789	0.669558	0.673101	0.0505608	0.214406	0.735033	0.0724538	0.261397	0.666149	0.0111636	0.0157019	0.0195143	0.00504904	0.00620377	0.00914537	0.021893	0.0469911	0.068884	0.068884	0.0364001	0.00851767	0.00520337	0.00520337
TR150_HUMAN	S698	0.197341	0.0148435	0.0579702	0.583983	0.754805	0.669563	0.218675	0.230352	0.272467	0.091919	0.0370113	0.0281196	0.668546	0.64225	0.605978	0.239535	0.320739	0.365903	0.0900517	0.66945	0.240498	0.05235	0.638925	0.308726	0.095385	0.0854108	0.0282949	0.034555	0.0314164	0.0640347	0.0377018	0.030526	0.0682277	0.0682277	0.554835	0.592415	0.16668	0.16668
SMRC2_HUMAN	S283	0.0761655	0.0640066	0.102171	0.546253	0.586495	0.555781	0.377581	0.349499	0.342048	0.110421	0.100615	0.0749965	0.598626	0.61727	0.631144	0.290953	0.282114	0.293859	0.0807811	0.562843	0.356376	0.0953442	0.61568	0.288976	0.0194964	0.0210296	0.0187382	0.018291	0.0163172	0.00611716	0.0145631	0.0528374	0.0674005	0.0674005	0.398827	0.0263368	0.00407175	0.00407175
TRA2B_HUMAN	S95,S97,S99	0.0917363	0.0214143	0.0273044	0.462921	0.328393	0.510439	0.445343	0.650193	0.462256	0.0251559	0.0335872	0.0203832	0.382614	0.485382	0.293835	0.59223	0.481031	0.685782	0.0468184	0.433918	0.519264	0.0263754	0.387277	0.586348	0.0390114	0.0944253	0.113703	0.00668593	0.0958584	0.102502	0.0204429	0.0466406	0.0670835	0.0670835	0.42157	0.580611	0.490117	0.42157
NP1L4_HUMAN	S125	0.80023	0.712291	0.776073	0.162437	0.178943	0.134617	0.037333	0.108765	0.0893105	0.824871	0.856236	0.808422	0.162763	0.130149	0.16305	0.0123656	0.0136151	0.0285286	0.762865	0.158666	0.0784696	0.829843	0.151987	0.0181698	0.0454326	0.0224027	0.0369295	0.0242917	0.018913	0.00899274	0.0669783	0.00667845	0.0602998	0.0669783	0.087472	0.713314	0.0514876	0.0514876
TOP2B_HUMAN	S1466	0.0603819	0.0148618	0.0334855	0.164389	0.148083	0.491282	0.775229	0.837055	0.475233	0.0402448	0.0213468	0.027235	0.175839	0.25447	0.193698	0.783916	0.724183	0.779067	0.0362431	0.267918	0.695839	0.0296089	0.208002	0.762389	0.022885	0.193611	0.193536	0.00967008	0.0412208	0.0331756	0.00663419	0.0599154	0.0665496	0.0665496	0.667754	0.627809	0.588721	0.588721
KI67_HUMAN	S308	0.124477	0.250574	0.319095	0.75504	0.675504	0.561825	0.120484	0.0739217	0.11908	0.259623	0.270701	0.171464	0.559798	0.571597	0.66213	0.180578	0.157703	0.166405	0.231382	0.664123	0.104495	0.23393	0.597842	0.168229	0.0987183	0.0971087	0.0264867	0.0543793	0.0559871	0.0115463	0.00254779	0.0662813	0.0637336	0.0662813	0.970644	0.363645	0.0187701	0.0187701
ICAL_HUMAN	S366	0.732754	0.697034	0.784998	0.250163	0.296419	0.204605	0.0170833	0.00654623	0.0103971	0.744834	0.767746	0.736644	0.192178	0.184027	0.183033	0.0629889	0.0482274	0.0803226	0.738262	0.250396	0.0113422	0.749741	0.186413	0.0638463	0.0442397	0.0459076	0.00533172	0.016121	0.00501731	0.0160648	0.0114791	0.0639832	0.0525041	0.0639832	0.694543	0.0743778	0.00579708	0.00579708
TR150_HUMAN	S939	0.197341	0.0148435	0.0579702	0.583983	0.754805	0.669563	0.218675	0.230352	0.272467	0.108076	0.128998	0.136354	0.633965	0.577594	0.608223	0.257959	0.293409	0.255423	0.0900517	0.66945	0.240498	0.124476	0.606594	0.26893	0.095385	0.0854108	0.0282949	0.0146711	0.0282207	0.0212368	0.0344243	0.0628567	0.0284324	0.0628567	0.570127	0.292784	0.236324	0.236324
STMN1_HUMAN	S63	0.872054	0.901322	0.925755	0.0673841	0.0448988	0.0399788	0.0605615	0.0537787	0.0342664	0.957945	0.954352	0.974706	0.0404895	0.0430494	0.0221596	0.0015656	0.00259808	0.00313398	0.899711	0.0507539	0.0495355	0.962335	0.0352328	0.00243255	0.0268864	0.0146107	0.0136514	0.0108638	0.0113939	0.000797184	0.062624	0.0155211	0.047103	0.062624	0.0201125	0.220418	0.00396392	0.00396392
YBOX1_HUMAN	S165	0.266144	0.443274	0.286942	0.64758	0.506464	0.674703	0.0862757	0.0502625	0.0383545	0.252308	0.393287	0.298595	0.727252	0.584405	0.694759	0.0204405	0.0223081	0.00664596	0.33212	0.609582	0.0582976	0.31473	0.668805	0.0164648	0.0968221	0.0903273	0.0249506	0.0718613	0.0748766	0.00855452	0.0173903	0.059223	0.0418327	0.059223	0.815041	0.431313	0.0515317	0.0515317
PGRC2_HUMAN	S208,Y210	0.0584256	0.0246687	0.0728367	0.927362	0.962548	0.922197	0.0142124	0.0127833	0.00496665	0.00180224	0.00430798	0.000940078	0.996822	0.993291	0.997854	0.00137534	0.00240094	0.0012064	0.051977	0.937369	0.0106541	0.0023501	0.995989	0.0016609	0.024723	0.0219582	0.00497706	0.00174951	0.00239268	0.000646442	0.0496269	0.0586201	0.00899324	0.0586201	0.025628	0.0100557	0.0360937	0.0100557
SAFB1_HUMAN	S604	0.0641621	0.056112	0.096142	0.445828	0.270423	0.29234	0.49001	0.673465	0.611518	0.0217206	0.0258669	0.0250895	0.465005	0.345826	0.371847	0.513275	0.628307	0.603064	0.0721387	0.336197	0.591665	0.0242256	0.394226	0.581548	0.0211736	0.0955734	0.0933249	0.002204	0.0626618	0.0604589	0.047913	0.0580292	0.0101162	0.0580292	0.0175661	0.428808	0.882427	0.0175661
HS90B_HUMAN	S255	0.677534	0.710178	0.699403	0.192318	0.156708	0.163438	0.130147	0.133114	0.137159	0.776808	0.697012	0.756064	0.155365	0.230351	0.156856	0.0678273	0.0726365	0.0870801	0.695705	0.170822	0.133474	0.743295	0.180857	0.075848	0.0166328	0.0189185	0.00351993	0.0414019	0.0428694	0.0100201	0.0475899	0.0100358	0.0576257	0.0576257	0.138403	0.729478	0.000714351	0.000714351
TR150_HUMAN	S243	0.197341	0.0148435	0.0579702	0.583983	0.754805	0.669563	0.218675	0.230352	0.272467	0.106907	0.0978099	0.0934306	0.60569	0.602914	0.627159	0.287403	0.299276	0.279411	0.0900517	0.66945	0.240498	0.0993825	0.611921	0.288697	0.095385	0.0854108	0.0282949	0.00687449	0.013269	0.00999557	0.00933076	0.0575295	0.0481988	0.0575295	0.874003	0.313189	0.0497184	0.0497184
MCM3_HUMAN	S672	0.736169	0.700377	0.748842	0.189314	0.229825	0.199982	0.0745174	0.0697983	0.0511758	0.694915	0.928485	0.714455	0.269961	0.030749	0.146727	0.0351243	0.0407663	0.138818	0.728463	0.206374	0.0651638	0.779285	0.149146	0.0715695	0.0251348	0.0209981	0.0123416	0.12958	0.119624	0.0583071	0.0508222	0.0572278	0.00640561	0.0572278	0.541339	0.460239	0.86138	0.460239
RS3_HUMAN	T221	0.474024	0.490458	0.502004	0.461676	0.395701	0.419448	0.0642998	0.113841	0.0785486	0.53575	0.554823	0.547361	0.399995	0.389208	0.386974	0.0642552	0.0559689	0.0656653	0.488829	0.425608	0.0855632	0.545978	0.392059	0.0619631	0.0140607	0.033416	0.0255047	0.00961147	0.00696282	0.00523882	0.0571496	0.0335496	0.0236001	0.0571496	0.00436218	0.163891	0.191518	0.00436218
PGRC2_HUMAN	S208	0.0584256	0.0246687	0.0728367	0.927362	0.962548	0.922197	0.0142124	0.0127833	0.00496665	0.00170893	0.00142024	0.00391177	0.996073	0.996534	0.989635	0.00221814	0.00204582	0.00645305	0.051977	0.937369	0.0106541	0.00234698	0.994081	0.00357234	0.024723	0.0219582	0.00497706	0.00136281	0.00385681	0.00249626	0.04963	0.0567118	0.0070818	0.0567118	0.0255436	0.0116371	0.0923478	0.0116371
HNRL2_HUMAN	S161	0.0521025	0.0504889	0.0376445	0.689889	0.668429	0.515915	0.258009	0.281082	0.44644	0.0389524	0.0419969	0.0284858	0.689057	0.668404	0.686449	0.271991	0.289599	0.285065	0.0467453	0.624744	0.32851	0.0364783	0.681304	0.282218	0.00792272	0.0948576	0.10278	0.00708718	0.0112468	0.00914261	0.010267	0.0565592	0.0462923	0.0565592	0.169663	0.363068	0.480521	0.169663
BASP1_HUMAN	S164	0.155896	0.281252	0.230451	0.727828	0.636293	0.665843	0.116276	0.0824549	0.103706	0.0142639	0.237394	0.315677	0.94601	0.650617	0.60175	0.039726	0.111989	0.0825724	0.222533	0.676655	0.100812	0.189112	0.732793	0.0780959	0.0630517	0.0467152	0.0170952	0.1564	0.186261	0.036339	0.0334215	0.056138	0.0227165	0.056138	0.748671	0.639247	0.382682	0.382682
RBM39_HUMAN	S136	0.0829287	0.153112	0.148183	0.828502	0.749988	0.728103	0.0885696	0.0969001	0.123714	0.0976982	0.0739022	0.0677492	0.826731	0.821752	0.826225	0.0755712	0.104346	0.106026	0.128075	0.768864	0.103061	0.0797832	0.824902	0.0953144	0.0391753	0.0527943	0.0183644	0.0158169	0.0027401	0.0171187	0.0482916	0.0560384	0.00774679	0.0560384	0.118825	0.140246	0.621353	0.118825
TBA1A_HUMAN	S48	0.66211	0.575801	0.246067	0.13869	0.217976	0.109741	0.1992	0.206223	0.644193	0.351343	0.520808	0.516385	0.280853	0.135005	0.218253	0.367804	0.344187	0.265362	0.494659	0.155469	0.349872	0.462846	0.21137	0.325784	0.21957	0.0560347	0.254914	0.0965893	0.0731672	0.0536433	0.0318139	0.0559016	0.0240877	0.0559016	0.829581	0.352715	0.880518	0.352715
SAFB1_HUMAN	S383,S384	0.0641621	0.056112	0.096142	0.445828	0.270423	0.29234	0.49001	0.673465	0.611518	0.0204186	0.0171671	0.011277	0.376736	0.517538	0.16773	0.602846	0.465295	0.820993	0.0721387	0.336197	0.591665	0.0162875	0.354001	0.629711	0.0211736	0.0955734	0.0933249	0.00463383	0.176009	0.179365	0.0558511	0.0178046	0.0380465	0.0558511	0.0111334	0.885086	0.760822	0.0111334
TR150_HUMAN	S406,S408	0.197341	0.0148435	0.0579702	0.583983	0.754805	0.669563	0.218675	0.230352	0.272467	0.0573729	0.0548422	0.0678236	0.64772	0.60429	0.680511	0.294907	0.340868	0.251665	0.0900517	0.66945	0.240498	0.0600129	0.644174	0.295813	0.095385	0.0854108	0.0282949	0.00688156	0.0382342	0.0446083	0.0300388	0.0252765	0.0553154	0.0553154	0.615315	0.664247	0.143927	0.143927
HMGA1_HUMAN	S36,T53	0.0844785	0.0254897	0.0602696	0.118758	0.167684	0.106341	0.796763	0.806827	0.833389	0.00171536	0.00146219	0.00174348	0.188306	0.134866	0.147141	0.809978	0.863672	0.851115	0.0567459	0.130928	0.812326	0.00164034	0.156771	0.841589	0.0296518	0.0324315	0.0189225	0.000154924	0.0279913	0.0280858	0.0551056	0.0258434	0.0292622	0.0551056	0.0323163	0.355074	0.208834	0.0323163
HDGF_HUMAN	S165	0.67821	0.803456	0.836132	0.298442	0.187536	0.156557	0.0233484	0.00900728	0.00731101	0.821676	0.816167	0.844688	0.171832	0.175467	0.148645	0.00649195	0.00836557	0.00666701	0.772599	0.214178	0.0132222	0.82751	0.165315	0.00717484	0.0833606	0.0746002	0.00881046	0.0151287	0.01455	0.00103491	0.0549111	0.0488637	0.0060474	0.0549111	0.324435	0.327882	0.303119	0.303119
TRA2B_HUMAN	S95,S99	0.0917363	0.0214143	0.0273044	0.462921	0.328393	0.510439	0.445343	0.650193	0.462256	0.0450182	0.0388433	0.0255059	0.412632	0.411983	0.34487	0.54235	0.549173	0.629624	0.0468184	0.433918	0.519264	0.0364558	0.389828	0.573716	0.0390114	0.0944253	0.113703	0.00997285	0.0389363	0.0485379	0.0103625	0.0440892	0.0544517	0.0544517	0.678844	0.496223	0.48805	0.48805
TR150_HUMAN	S320	0.197341	0.0148435	0.0579702	0.583983	0.754805	0.669563	0.218675	0.230352	0.272467	0.0402546	0.00874556	0.0592788	0.762621	0.629121	0.625107	0.197124	0.362133	0.315614	0.0900517	0.66945	0.240498	0.036093	0.672283	0.291624	0.095385	0.0854108	0.0282949	0.0255224	0.0782606	0.08508	0.0539587	0.00283278	0.051126	0.0539587	0.397482	0.968246	0.379244	0.379244
NPM_HUMAN	S70	0.298186	0.31517	0.313583	0.40803	0.384023	0.409325	0.293784	0.300808	0.277092	0.299839	0.393055	0.313788	0.446294	0.425822	0.410285	0.253867	0.181123	0.275927	0.30898	0.400459	0.290561	0.335561	0.427467	0.236972	0.00938142	0.0142492	0.0121821	0.0502778	0.0180606	0.0496085	0.0265811	0.0270077	0.0535888	0.0535888	0.418925	0.111777	0.14337	0.111777
STMN1_HUMAN	S38	0.872054	0.901322	0.925755	0.0673841	0.0448988	0.0399788	0.0605615	0.0537787	0.0342664	0.944407	0.966505	0.945075	0.0551347	0.0329631	0.0537032	0.000457944	0.000532069	0.00122156	0.899711	0.0507539	0.0495355	0.951996	0.047267	0.000737192	0.0268864	0.0146107	0.0136514	0.0125696	0.0124082	0.000421112	0.0522852	0.00348689	0.0487983	0.0522852	0.0379807	0.76846	0.00346552	0.00346552
PGRC2_HUMAN	Y210	0.0584256	0.0246687	0.0728367	0.927362	0.962548	0.922197	0.0142124	0.0127833	0.00496665	0.00707107	0.00265265	0.00560287	0.987747	0.991529	0.986905	0.00518177	0.00581852	0.00749181	0.051977	0.937369	0.0106541	0.00510886	0.988727	0.00616403	0.024723	0.0219582	0.00497706	0.00225025	0.0024626	0.00119315	0.0468681	0.0513582	0.0044901	0.0513582	0.0307898	0.0157874	0.203256	0.0157874
NUCL_HUMAN	S67	0.307142	0.325732	0.280563	0.559793	0.519394	0.559315	0.133065	0.154874	0.160122	0.327253	0.375147	0.362066	0.552786	0.502347	0.527878	0.119961	0.122506	0.110056	0.304479	0.546167	0.149354	0.354822	0.52767	0.117508	0.022702	0.0231874	0.0143486	0.0247553	0.0252203	0.00657743	0.0503429	0.0184971	0.0318457	0.0503429	0.0603016	0.402651	0.0250204	0.0250204
MCM2_HUMAN	S139	0.723715	0.754293	0.811743	0.218273	0.143012	0.120942	0.0580124	0.102695	0.067315	0.82824	0.819071	0.790006	0.131794	0.123814	0.150424	0.0399663	0.0571141	0.0595705	0.76325	0.160742	0.0760074	0.812439	0.135344	0.052217	0.0446923	0.0510302	0.0235753	0.0199614	0.0136553	0.0106803	0.0491886	0.0253983	0.0237904	0.0491886	0.156731	0.451813	0.186579	0.156731
CHD4_HUMAN	S1602	0.0441673	0.0375347	0.0813916	0.806927	0.676062	0.552151	0.148906	0.286403	0.366457	0.0119963	0.0192408	0.010693	0.51876	0.820744	0.67019	0.469243	0.160015	0.319117	0.0543646	0.67838	0.267255	0.0139767	0.669898	0.316125	0.0236399	0.127404	0.110032	0.00460515	0.150992	0.154636	0.0403879	0.00848219	0.04887	0.04887	0.0439176	0.944291	0.678674	0.0439176
HS90A_HUMAN	S263	0.694574	0.731204	0.724308	0.185987	0.143251	0.164788	0.119439	0.125545	0.110904	0.546776	0.717353	0.739555	0.17512	0.191748	0.133954	0.278104	0.0908992	0.126491	0.716695	0.164675	0.118629	0.667894	0.166941	0.165165	0.0194655	0.0213684	0.00735407	0.105478	0.0297524	0.0994141	0.0488008	0.00226517	0.0465356	0.0488008	0.474743	0.919862	0.464113	0.464113
ROA1_HUMAN	S6	0.0911858	0.119274	0.0803948	0.672846	0.618467	0.666451	0.235968	0.262259	0.253154	0.0889305	0.100614	0.0928145	0.67199	0.585589	0.563523	0.23908	0.313797	0.343662	0.0969514	0.652588	0.25046	0.0941196	0.607034	0.298846	0.0200705	0.0297223	0.0133511	0.00595008	0.0573249	0.0538702	0.00283177	0.045554	0.0483858	0.0483858	0.826258	0.288822	0.20555	0.20555
KTN1_HUMAN	S75	0.0184653	0.0286203	0.0214022	0.949773	0.941372	0.937571	0.0317621	0.0300081	0.0410269	0.00349502	0.00103543	0.00403886	0.989966	0.993579	0.990189	0.00653927	0.00538536	0.00577249	0.0228293	0.942905	0.0342657	0.00285644	0.991245	0.00589904	0.00522576	0.00624369	0.00592069	0.00160031	0.00202497	0.000587273	0.0199728	0.0483395	0.0283667	0.0483395	0.00318854	0.000217644	0.00117317	0.000217644
KTN1_HUMAN	T153	0.0184653	0.0286203	0.0214022	0.949773	0.941372	0.937571	0.0317621	0.0300081	0.0410269	0.00909426	0.172668	0.000131526	0.980544	0.799647	0.903767	0.0103622	0.0276848	0.0961012	0.0228293	0.942905	0.0342657	0.0606313	0.894653	0.0447161	0.00522576	0.00624369	0.00592069	0.0971302	0.0907921	0.0453359	0.0378021	0.0482525	0.0104504	0.0482525	0.537758	0.410401	0.712392	0.410401
RCC2_HUMAN	S43,S45	0.172224	0.188672	0.174304	0.821035	0.805365	0.819321	0.00674125	0.005963	0.00637536	0.132901	0.157718	0.134239	0.84844	0.764317	0.799289	0.0186586	0.0779653	0.0664715	0.1784	0.81524	0.00635987	0.141619	0.804016	0.0543651	0.00895673	0.00859529	0.000389356	0.0139577	0.0422603	0.0314523	0.0367805	0.0112247	0.0480052	0.0480052	0.0184387	0.675478	0.0573756	0.0184387
KTN1_HUMAN	S75,S79	0.0184653	0.0286203	0.0214022	0.949773	0.941372	0.937571	0.0317621	0.0300081	0.0410269	0.00478818	0.0032851	0.00100347	0.987007	0.989745	0.99216	0.00820509	0.00697015	0.00683619	0.0228293	0.942905	0.0342657	0.00302558	0.989637	0.00733715	0.00522576	0.00624369	0.00592069	0.00190566	0.00257849	0.000754643	0.0198037	0.0467322	0.0269285	0.0467322	0.00351094	0.000278026	0.0014473	0.000278026
NOLC1_HUMAN	S623	0.205708	0.314286	0.231727	0.415811	0.310981	0.364141	0.378481	0.374733	0.404132	0.235437	0.232428	0.213048	0.292663	0.365213	0.366936	0.4719	0.402359	0.420016	0.250573	0.363644	0.385782	0.226971	0.341604	0.431425	0.0566896	0.052417	0.0160016	0.0121511	0.0423931	0.036147	0.0236022	0.0220405	0.0456427	0.0456427	0.519636	0.601467	0.116135	0.116135
LAP2A_HUMAN	S66,S67	0.113531	0.115979	0.0526426	0.716413	0.664241	0.831119	0.170056	0.21978	0.116238	0.132805	0.143302	0.141132	0.726645	0.681467	0.714945	0.140549	0.175231	0.143923	0.0940508	0.737258	0.168692	0.13908	0.707686	0.153234	0.0358815	0.0853696	0.0517844	0.00554097	0.0234474	0.0191242	0.045029	0.0295717	0.0154574	0.045029	0.0981847	0.593906	0.653045	0.0981847
IF4B_HUMAN	S406	0.548858	0.574711	0.593977	0.44351	0.412965	0.397195	0.00763146	0.0123244	0.00882811	0.535687	0.553413	0.506978	0.457546	0.439371	0.488938	0.00676654	0.00721577	0.00408377	0.572515	0.41789	0.00959466	0.532026	0.461952	0.00602203	0.0226392	0.0235471	0.00243857	0.023433	0.0250755	0.00169354	0.0404894	0.044062	0.00357263	0.044062	0.0977237	0.0907492	0.105517	0.0907492
NOP2_HUMAN	S181,T185	0.126592	0.070557	0.0949606	0.431019	0.383467	0.241855	0.44239	0.545976	0.663184	0.04976	0.0462905	0.0644393	0.36172	0.348733	0.387636	0.58852	0.604976	0.547924	0.0973697	0.352114	0.550517	0.0534966	0.36603	0.580473	0.0280949	0.0984024	0.110467	0.00963413	0.0198063	0.0293647	0.0438731	0.0139164	0.0299567	0.0438731	0.0627355	0.822029	0.673414	0.0627355
RLA2_HUMAN	S102,S105	0.400047	0.415453	0.416162	0.5354	0.454301	0.503564	0.0645533	0.130246	0.080274	0.465629	0.40558	0.405243	0.495603	0.534564	0.549715	0.0387677	0.0598558	0.0450416	0.410554	0.497755	0.0916911	0.425484	0.526628	0.0478884	0.00910631	0.0408603	0.0343023	0.0347671	0.0279154	0.0108285	0.0149304	0.0288723	0.0438028	0.0438028	0.511604	0.36939	0.102586	0.102586
ICAL_HUMAN	S575	0.732754	0.697034	0.784998	0.250163	0.296419	0.204605	0.0170833	0.00654623	0.0103971	0.69328	0.635928	0.920921	0.228286	0.354132	0.0395395	0.0784348	0.00993997	0.0395395	0.738262	0.250396	0.0113422	0.750043	0.207319	0.0426381	0.0442397	0.0459076	0.00533172	0.150737	0.158341	0.0343524	0.0117809	0.0430768	0.0312959	0.0430768	0.902923	0.674318	0.193941	0.193941
PSIP1_HUMAN	S106	0.0449573	0.0202215	0.0245898	0.786347	0.77043	0.80442	0.168696	0.209349	0.17099	0.0170166	0.00737212	0.0175543	0.724284	0.782288	0.775276	0.258699	0.210339	0.207169	0.0299229	0.787066	0.183011	0.013981	0.760616	0.225403	0.0132022	0.0170067	0.0228375	0.00572974	0.0316592	0.0288791	0.0159419	0.0264493	0.0423912	0.0423912	0.127478	0.271416	0.116883	0.116883
NEST_HUMAN	S548	0.144142	0.321483	0.0871963	0.050347	0.152135	0.546531	0.805511	0.526381	0.366273	0.0472734	0.317459	0.133454	0.209312	0.106832	0.55957	0.743414	0.57571	0.306977	0.184274	0.249671	0.566055	0.166062	0.291904	0.542034	0.122191	0.262077	0.222291	0.138013	0.237401	0.220159	0.0182119	0.0422333	0.0240214	0.0422333	0.872432	0.84622	0.900627	0.84622
VIME_HUMAN	S51	0.0700346	0.0642325	0.0659609	0.0588276	0.0510676	0.0678462	0.871138	0.8847	0.866193	0.0209042	0.0205283	0.0323356	0.0814592	0.0753906	0.0953656	0.897637	0.904081	0.872299	0.0667427	0.0592471	0.87401	0.0245894	0.0840718	0.891339	0.00297898	0.00839716	0.00958199	0.00671111	0.0102405	0.016801	0.0421533	0.0248247	0.0173286	0.0421533	0.000574441	0.0314712	0.195658	0.000574441
DDX21_HUMAN	S121	0.130457	0.168693	0.143925	0.383804	0.336476	0.334738	0.485739	0.494831	0.521336	0.207989	0.139242	0.19694	0.336333	0.260366	0.33296	0.455677	0.600392	0.470099	0.147692	0.351673	0.500636	0.181391	0.309887	0.508723	0.0193942	0.0278401	0.018495	0.0369173	0.0429193	0.0797146	0.033699	0.0417862	0.00808726	0.0417862	0.234193	0.230053	0.872397	0.230053
SEPT2_HUMAN	S218	0.442299	0.433774	0.476099	0.517595	0.523509	0.432402	0.0401055	0.0427172	0.0914994	0.558683	0.440335	0.4599	0.385768	0.458151	0.507647	0.0555497	0.101514	0.0324536	0.450724	0.491169	0.0581073	0.486306	0.450522	0.0631724	0.022385	0.0509796	0.0289478	0.0634389	0.0612968	0.0351556	0.0355819	0.0406469	0.00506507	0.0406469	0.411439	0.427082	0.856624	0.411439
TR150_HUMAN	S672	0.197341	0.0148435	0.0579702	0.583983	0.754805	0.669563	0.218675	0.230352	0.272467	0.045637	0.0633114	0.0427921	0.707797	0.676915	0.639123	0.246566	0.259773	0.318085	0.0900517	0.66945	0.240498	0.0505802	0.674612	0.274808	0.095385	0.0854108	0.0282949	0.0111169	0.034395	0.0380562	0.0394716	0.0051615	0.0343101	0.0394716	0.515831	0.927323	0.278409	0.278409
RBMX_HUMAN	S91	0.0403485	0.0488548	0.0624792	0.225071	0.196375	0.221772	0.73458	0.75477	0.715749	0.0228485	0.00895998	0.00346696	0.201106	0.137932	0.30649	0.776045	0.853108	0.690043	0.0505608	0.214406	0.735033	0.0117585	0.215176	0.773065	0.0111636	0.0157019	0.0195143	0.00998923	0.0851551	0.0815732	0.0388023	0.000770039	0.0380323	0.0388023	0.010936	0.988448	0.476139	0.010936
PLEC_HUMAN	S125	0.0544513	0.0652363	0.0631374	0.0685738	0.0651016	0.0585535	0.876975	0.869662	0.878309	0.0836614	0.00591408	0.0286929	0.0601929	0.0347692	0.0457661	0.856146	0.959317	0.925541	0.0609417	0.0640763	0.874982	0.0394228	0.0469094	0.913668	0.00571798	0.00508826	0.00465523	0.0399688	0.0127503	0.0526003	0.0215189	0.0171669	0.0386858	0.0386858	0.408187	0.0962498	0.273288	0.0962498
MATR3_HUMAN	S188	0.0513613	0.0754749	0.0558839	0.730919	0.641538	0.695274	0.21772	0.282987	0.248842	0.127855	0.0955636	0.0746373	0.684412	0.622779	0.716307	0.187733	0.281658	0.209056	0.0609067	0.689244	0.249849	0.0993518	0.674499	0.226149	0.0128175	0.0449944	0.0326452	0.0268102	0.0475456	0.0492401	0.0384451	0.0147445	0.0237007	0.0384451	0.088543	0.716324	0.5254	0.088543
EF1D_HUMAN	S162	0.186648	0.1983	0.165302	0.787761	0.785117	0.759819	0.0255915	0.0165827	0.0748793	0.188755	0.173032	0.142196	0.79768	0.816242	0.832997	0.0135647	0.010726	0.0248074	0.183417	0.777566	0.0390178	0.167994	0.81564	0.016366	0.0167348	0.0154258	0.0313819	0.0236852	0.0176663	0.00744695	0.0154222	0.038074	0.0226518	0.038074	0.409132	0.0482277	0.29069	0.0482277
ACOD_HUMAN	T199	0.00543863	0.00415158	0.00290585	0.937539	0.942794	0.930455	0.0570226	0.0530541	0.0666391	0.0284606	0.0589013	0.0389298	0.951408	0.892973	0.922093	0.0201312	0.048126	0.0389777	0.00416536	0.936929	0.0589052	0.0420973	0.922158	0.035745	0.00126645	0.00619218	0.00698546	0.0154655	0.0292178	0.0142746	0.0379319	0.0147716	0.0231603	0.0379319	0.0133275	0.439929	0.0650661	0.0133275
MCM4_HUMAN	S131	0.684021	0.769282	0.837675	0.190062	0.142108	0.103693	0.125917	0.0886101	0.0586314	0.760749	0.684861	0.748718	0.196022	0.151115	0.201248	0.043229	0.164024	0.0500344	0.763659	0.145288	0.0910529	0.731443	0.182795	0.0857624	0.0769815	0.0432721	0.0337094	0.0407869	0.0275596	0.0678617	0.0322164	0.0375069	0.00529058	0.0375069	0.556693	0.274136	0.909575	0.274136
G3BP1_HUMAN	S149	0.364056	0.346304	0.292625	0.62112	0.563794	0.613789	0.0148236	0.089902	0.0935859	0.367966	0.371514	0.354207	0.608582	0.608286	0.601187	0.0234514	0.0202006	0.0446063	0.334329	0.599568	0.0661038	0.364562	0.606018	0.0294195	0.0371908	0.031197	0.0444482	0.00914199	0.00418656	0.0132523	0.0302336	0.00645078	0.0366843	0.0366843	0.243316	0.740542	0.242574	0.242574
SC61B_HUMAN	S14	0.00652119	0.00552872	0.00459995	0.979638	0.95625	0.97596	0.0138404	0.0382215	0.0194397	0.0388545	0.0257529	0.0231111	0.929969	0.939302	0.934301	0.0311763	0.0349454	0.0425878	0.00554995	0.970616	0.0238339	0.0292395	0.934524	0.0362365	0.000960795	0.0125769	0.0127707	0.00843092	0.00467018	0.00581425	0.0236896	0.0360922	0.0124026	0.0360922	0.00842761	0.00959224	0.200539	0.00842761
NUMA1_HUMAN	S1757	0.104992	0.132369	0.093496	0.304953	0.294717	0.346264	0.590055	0.572914	0.56024	0.0795888	0.0566181	0.0869574	0.279196	0.25834	0.488493	0.641215	0.685042	0.42455	0.110286	0.315311	0.574403	0.0743881	0.34201	0.583602	0.01997	0.02729	0.0149629	0.0158241	0.127286	0.139476	0.0358978	0.0266986	0.00919925	0.0358978	0.0711876	0.740357	0.915038	0.0711876
MBB1A_HUMAN	S1267	0.134767	0.151992	0.138739	0.455486	0.492445	0.49943	0.409748	0.355563	0.361831	0.155295	0.149355	0.220988	0.504736	0.496346	0.444755	0.33997	0.354299	0.334256	0.141832	0.482454	0.375714	0.175213	0.481946	0.342842	0.00901963	0.0236146	0.0296402	0.0397541	0.0324799	0.0103255	0.0333801	0.000507933	0.0328721	0.0333801	0.229092	0.983571	0.143878	0.143878
BYST_HUMAN	S98	0.195742	0.15068	0.168681	0.340978	0.384903	0.0196478	0.46328	0.464417	0.811671	0.266592	0.170646	0.176487	0.248539	0.243833	0.205842	0.484869	0.585521	0.617671	0.171701	0.24851	0.579789	0.204575	0.232738	0.562687	0.0226825	0.199413	0.200816	0.0537876	0.0234113	0.0692832	0.0328738	0.0157718	0.017102	0.0328738	0.38459	0.89835	0.895841	0.38459
DKC1_HUMAN	S494	0.0804396	0.134869	0.103593	0.261226	0.214098	0.312916	0.658335	0.651033	0.583491	0.126541	0.104844	0.104094	0.243947	0.211794	0.234226	0.629512	0.683362	0.66168	0.106301	0.262746	0.630953	0.111827	0.229989	0.658185	0.0273155	0.0494268	0.0412652	0.0127489	0.0164898	0.0270946	0.00552595	0.0327576	0.0272316	0.0327576	0.766737	0.337403	0.393451	0.337403
NOP58_HUMAN	S502	0.0536012	0.0659713	0.0929599	0.143413	0.144706	0.145439	0.802986	0.789323	0.761601	0.0373621	0.0422061	0.0348295	0.163478	0.151669	0.144456	0.79916	0.806125	0.820714	0.0708442	0.144519	0.784637	0.0381326	0.153201	0.808666	0.0201267	0.00102556	0.0210864	0.00374816	0.00960311	0.0109997	0.0327116	0.00868186	0.0240297	0.0327116	0.0504607	0.194453	0.155012	0.0504607
ACINU_HUMAN	S1004	0.0913893	0.0609287	0.105267	0.143244	0.12968	0.033975	0.765367	0.809391	0.860758	0.0505613	0.0545807	0.0566859	0.132073	0.0971363	0.0903219	0.817366	0.848283	0.852992	0.0858617	0.1023	0.811839	0.0539426	0.10651	0.839547	0.0226801	0.0595582	0.0477426	0.00311178	0.0223983	0.019353	0.031919	0.00421071	0.0277083	0.031919	0.0731586	0.914272	0.40428	0.0731586
HNRH1_HUMAN	T100	0.141018	0.135107	0.135539	0.596506	0.637353	0.540179	0.262476	0.22754	0.324282	0.146773	0.187331	0.132984	0.654535	0.519438	0.63963	0.198693	0.293231	0.227386	0.137221	0.591346	0.271433	0.155696	0.604534	0.23977	0.00329523	0.0487921	0.0489892	0.0282509	0.0740714	0.0484706	0.0184747	0.0131882	0.0316629	0.0316629	0.32351	0.809472	0.470713	0.32351
LMNB1_HUMAN	S393	0.0319552	0.0363538	0.0310553	0.0669357	0.0644774	0.0450448	0.901109	0.899169	0.9239	0.000947324	0.00109733	0.00248213	0.125438	0.0869905	0.0463315	0.873615	0.911912	0.951186	0.0331214	0.0588193	0.908059	0.00150893	0.0862534	0.912238	0.00283525	0.0119922	0.0137527	0.000846149	0.0395584	0.0387869	0.0316125	0.0274341	0.00417842	0.0316125	5.01812e-05	0.314394	0.868946	5.01812e-05
AT2A2_HUMAN	S663	0.0127958	0.0221195	0.00788422	0.908736	0.894817	0.874965	0.078468	0.0830638	0.117151	0.038568	0.0570453	0.00603785	0.882614	0.899072	0.927079	0.0788183	0.0438826	0.0668833	0.0142665	0.892839	0.0928943	0.0338837	0.902922	0.0631947	0.00723071	0.0169723	0.0211322	0.0258243	0.0224811	0.0177575	0.0196172	0.0100824	0.0296996	0.0296996	0.273899	0.568859	0.135827	0.135827
RL23A_HUMAN	T42	0.350822	0.360192	0.346961	0.541056	0.505775	0.507605	0.108122	0.134033	0.145434	0.342622	0.402944	0.340272	0.524349	0.437316	0.504889	0.133029	0.15974	0.154839	0.352658	0.518145	0.129196	0.361946	0.488851	0.149203	0.00680352	0.0198623	0.0191205	0.0355247	0.0456793	0.0142198	0.00928763	0.029294	0.0200064	0.029294	0.679508	0.365977	0.219562	0.219562
TOP2B_HUMAN	S1400,Y1421orT1422orS1424	0.0603819	0.0148618	0.0334855	0.164389	0.148083	0.491282	0.775229	0.837055	0.475233	0.00476167	0.0104191	0.00586862	0.3243	0.248367	0.263583	0.670939	0.741214	0.730548	0.0362431	0.267918	0.695839	0.00701646	0.27875	0.714234	0.022885	0.193611	0.193536	0.0029983	0.0401742	0.0378718	0.0292266	0.010832	0.0183946	0.0292266	0.0933509	0.928971	0.879486	0.0933509
G3BP1_HUMAN	S232	0.364056	0.346304	0.292625	0.62112	0.563794	0.613789	0.0148236	0.089902	0.0935859	0.282115	0.413033	0.355903	0.690001	0.54898	0.596935	0.027884	0.0379865	0.0471626	0.334329	0.599568	0.0661038	0.35035	0.611972	0.0376777	0.0371908	0.031197	0.0444482	0.0656355	0.0717028	0.009643	0.0160217	0.0124043	0.0284261	0.0284261	0.731624	0.797109	0.339917	0.339917
LA_HUMAN	S366	0.766853	0.761659	0.704841	0.199255	0.207808	0.251036	0.0338918	0.0305337	0.0441233	0.671718	0.711928	0.771261	0.303789	0.242465	0.196321	0.024493	0.045607	0.0324183	0.744451	0.219366	0.0361829	0.718302	0.247525	0.0341728	0.0344015	0.0277582	0.00707857	0.0500766	0.0539125	0.0106658	0.0261484	0.0281586	0.00201013	0.0281586	0.497412	0.466304	0.799097	0.466304
HSPB1_HUMAN	S82	0.934135	0.869797	0.922862	0.0526498	0.0705093	0.0545286	0.0132152	0.0596934	0.0226091	0.871888	0.88749	0.884467	0.0944817	0.0786063	0.0889672	0.0336298	0.0339037	0.0265662	0.908932	0.0592292	0.0318392	0.881282	0.0873518	0.0313666	0.0343567	0.00981387	0.0245754	0.008274	0.00806004	0.00415951	0.0276499	0.0281225	0.00047268	0.0281225	0.246833	0.0185296	0.97537	0.0185296
TOP2B_HUMAN	S1522,S1526	0.0603819	0.0148618	0.0334855	0.164389	0.148083	0.491282	0.775229	0.837055	0.475233	0.0336389	0.0275689	0.0361286	0.251928	0.22268	0.256208	0.714434	0.749751	0.707664	0.0362431	0.267918	0.695839	0.0324455	0.243605	0.723949	0.022885	0.193611	0.193536	0.00440288	0.0182474	0.0225996	0.0037976	0.0243127	0.0281103	0.0281103	0.791757	0.83916	0.814992	0.791757
RL4_HUMAN	S295	0.377466	0.364219	0.339311	0.516175	0.525939	0.49596	0.10636	0.109842	0.164729	0.33959	0.324416	0.368076	0.527071	0.59133	0.503208	0.133339	0.0842544	0.128716	0.360332	0.512691	0.126977	0.344027	0.540536	0.115437	0.0193719	0.0152899	0.0327403	0.0221659	0.0455781	0.0271033	0.0163047	0.027845	0.0115403	0.027845	0.391723	0.372522	0.662649	0.372522
SRSF1_HUMAN	S199,Y202,S205	0.0699712	0.0728611	0.0567778	0.452717	0.308817	0.325154	0.477312	0.618322	0.618069	0.0803353	0.0751204	0.0653732	0.388539	0.36624	0.393585	0.531126	0.55864	0.541042	0.0665367	0.362229	0.571234	0.0736096	0.382788	0.543603	0.00857406	0.0787892	0.0813391	0.0075946	0.0145512	0.0139343	0.00707294	0.0205585	0.0276315	0.0276315	0.345064	0.679719	0.593053	0.345064
UHRF1_HUMAN	S91	0.0141288	0.0251701	0.0143565	0.954701	0.892933	0.972341	0.0311701	0.0818969	0.0133021	0.0111487	0.00714511	0.0126503	0.919559	0.901929	0.938697	0.0692919	0.0909262	0.0486524	0.0178851	0.939992	0.042123	0.0103147	0.920062	0.0696235	0.00630998	0.0416976	0.0355849	0.00284576	0.0183895	0.0211389	0.00757045	0.01993	0.0275005	0.0275005	0.131097	0.490941	0.313923	0.131097
DDX21_HUMAN	S89	0.130457	0.168693	0.143925	0.383804	0.336476	0.334738	0.485739	0.494831	0.521336	0.130161	0.141619	0.15498	0.361553	0.371522	0.403364	0.508285	0.486859	0.441656	0.147692	0.351673	0.500636	0.142253	0.378813	0.478933	0.0193942	0.0278401	0.018495	0.0124213	0.0218381	0.0340142	0.00543833	0.0271404	0.0217021	0.0271404	0.703497	0.254721	0.386593	0.254721
SPTB2_HUMAN	S2164,S2165,S2169	0.124992	0.205115	0.111013	0.21376	0.141521	0.16803	0.661248	0.653364	0.720956	0.133417	0.139931	0.122069	0.168905	0.21014	0.223265	0.697678	0.649929	0.654666	0.14704	0.174437	0.678523	0.131805	0.20077	0.667424	0.0507778	0.0365433	0.0369594	0.0090391	0.0283657	0.0263075	0.0152349	0.0263331	0.0110982	0.0263331	0.635863	0.379977	0.693559	0.379977
NUCL_HUMAN	S28,S34,S41,S42	0.307142	0.325732	0.280563	0.559793	0.519394	0.559315	0.133065	0.154874	0.160122	0.273277	0.331626	0.298422	0.544898	0.440833	0.588047	0.181825	0.227541	0.113532	0.304479	0.546167	0.149354	0.301108	0.524592	0.174299	0.022702	0.0231874	0.0143486	0.0292672	0.0756782	0.0573757	0.00337052	0.021575	0.0249455	0.0249455	0.882399	0.661442	0.50554	0.50554
SRS10_HUMAN	S133	0.0198629	0.0183253	0.0460706	0.375851	0.281537	0.211439	0.604286	0.700137	0.74249	0.00354019	0.00304015	0.00329615	0.353596	0.229861	0.356354	0.642863	0.767099	0.64035	0.0280863	0.289609	0.682304	0.00329216	0.313271	0.683437	0.0155939	0.0825024	0.0708066	0.000250041	0.0722477	0.0724637	0.0247941	0.0236612	0.00113292	0.0247941	0.0511853	0.727587	0.985475	0.0511853
EF2_HUMAN	T57	0.824971	0.808476	0.830979	0.121193	0.122759	0.115802	0.0538364	0.0687655	0.0532189	0.801005	0.862526	0.87338	0.13497	0.107171	0.0808979	0.0640249	0.030303	0.0457224	0.821475	0.119918	0.0586069	0.845637	0.10768	0.0466834	0.0116519	0.00364959	0.00880296	0.0390313	0.0270396	0.0168815	0.0241617	0.0122382	0.0119235	0.0241617	0.362301	0.480609	0.339043	0.339043
SNTB2_HUMAN	S110	0.0214147	0.104786	0.0239653	0.912465	0.743904	0.953676	0.0661201	0.15131	0.0223591	0.0456824	0.103662	0.0281981	0.901873	0.836446	0.914801	0.0524447	0.0598923	0.0570011	0.0500554	0.870015	0.0799297	0.0591807	0.884373	0.056446	0.0474155	0.111142	0.0655752	0.0395012	0.0420065	0.0037547	0.00912532	0.0143583	0.0234836	0.0234836	0.810497	0.844434	0.569271	0.569271
PSIP1_HUMAN	S118,S129	0.0449573	0.0202215	0.0245898	0.786347	0.77043	0.80442	0.168696	0.209349	0.17099	0.00496342	0.00639284	0.00837891	0.804779	0.782834	0.800198	0.190258	0.210773	0.191423	0.0299229	0.787066	0.183011	0.00657839	0.795937	0.197485	0.0132022	0.0170067	0.0228375	0.00171528	0.0115762	0.0115228	0.0233445	0.00887131	0.0144732	0.0233445	0.03851	0.49664	0.382573	0.03851
DKC1_HUMAN	S513	0.0804396	0.134869	0.103593	0.261226	0.214098	0.312916	0.658335	0.651033	0.583491	0.126177	0.138867	0.115043	0.276552	0.250857	0.269635	0.597271	0.610276	0.615322	0.106301	0.262746	0.630953	0.126696	0.265681	0.607623	0.0273155	0.0494268	0.0412652	0.0119203	0.0132959	0.0093137	0.0203952	0.00293475	0.0233299	0.0233299	0.301508	0.925669	0.393562	0.301508
HP1B3_HUMAN	S441,S442,S446	0.239243	0.18289	0.159735	0.411117	0.325764	0.427944	0.34964	0.491346	0.412322	0.172581	0.218658	0.259943	0.377897	0.350065	0.383456	0.449523	0.431277	0.356601	0.193956	0.388275	0.417769	0.21706	0.370472	0.412467	0.0408928	0.0547859	0.0710095	0.043703	0.0178907	0.0492338	0.0231046	0.0178025	0.0053021	0.0231046	0.540339	0.620995	0.920476	0.540339
SRSF1_HUMAN	S199	0.0699712	0.0728611	0.0567778	0.452717	0.308817	0.325154	0.477312	0.618322	0.618069	0.104836	0.0827029	0.0743257	0.415835	0.286494	0.390994	0.479329	0.630803	0.53468	0.0665367	0.362229	0.571234	0.0872882	0.364441	0.548271	0.00857406	0.0787892	0.0813391	0.0157634	0.0686371	0.076646	0.0207515	0.00221201	0.0229635	0.0229635	0.115719	0.972508	0.739905	0.115719
CD44_HUMAN	S704	0.0190178	0.0268267	0.030503	0.946595	0.940006	0.932077	0.0343869	0.0331676	0.0374199	0.01319	0.00369201	0.0273733	0.977671	0.979878	0.929118	0.0091385	0.0164301	0.0435084	0.0254492	0.939559	0.0349915	0.0147518	0.962223	0.0230257	0.00586518	0.0072694	0.00218969	0.0119176	0.0286904	0.0181094	0.0106974	0.0226632	0.0119658	0.0226632	0.235507	0.255407	0.319335	0.235507
DHCR7_HUMAN	S14	0.00696785	0.0043097	0.0102126	0.89999	0.834655	0.864956	0.0930421	0.161035	0.124832	0.00814758	0.00689083	0.00705371	0.879406	0.876867	0.909593	0.112446	0.116242	0.083353	0.00716337	0.866534	0.126303	0.00736404	0.888622	0.104014	0.00295629	0.0326961	0.0340204	0.000683437	0.0182057	0.017993	0.00020067	0.0220886	0.0222893	0.0222893	0.914322	0.364421	0.372558	0.364421
AKA12_HUMAN	S598	0.799947	0.767826	0.802956	0.151669	0.206276	0.181434	0.0483841	0.0258975	0.0156096	0.814632	0.805111	0.817068	0.165662	0.179877	0.161674	0.0197061	0.015012	0.0212581	0.790243	0.179793	0.0299637	0.81227	0.169071	0.0186587	0.0194717	0.0273406	0.0167614	0.0063186	0.00956836	0.00325213	0.0220273	0.0107223	0.011305	0.0220273	0.135817	0.556322	0.315389	0.135817
COIL_HUMAN	T122	0.026032	0.00369948	0.0205471	0.018865	0.072159	0.0465642	0.955103	0.924142	0.932889	0.0140039	0.0100369	0.0143955	0.0133867	0.0452912	0.0255271	0.972609	0.944672	0.960077	0.0167595	0.0458627	0.937378	0.0128121	0.0280684	0.95912	0.0116381	0.0266539	0.0159614	0.00241135	0.0161033	0.0139934	0.00394744	0.0177944	0.0217418	0.0217418	0.595923	0.378336	0.150723	0.150723
TR150_HUMAN	S315,S320	0.197341	0.0148435	0.0579702	0.583983	0.754805	0.669563	0.218675	0.230352	0.272467	0.0633267	0.0847541	0.0809131	0.768644	0.655729	0.648828	0.168029	0.259516	0.270259	0.0900517	0.66945	0.240498	0.0763313	0.691067	0.232601	0.095385	0.0854108	0.0282949	0.0114249	0.0672722	0.0561787	0.0137204	0.0216168	0.0078964	0.0216168	0.816797	0.747907	0.838512	0.747907
TOP2A_HUMAN	S1377	0.0885552	0.105375	0.0837369	0.0597757	0.147318	0.147008	0.851669	0.747307	0.769255	0.0640012	0.0925093	0.0570538	0.137896	0.134487	0.115965	0.798103	0.773003	0.826981	0.0925557	0.118034	0.78941	0.0711881	0.12945	0.799362	0.0113601	0.0504535	0.0550232	0.0187886	0.0118015	0.0270109	0.0213675	0.0114155	0.00995205	0.0213675	0.167147	0.72217	0.79249	0.167147
HP1B3_HUMAN	S431,S441,S446	0.239243	0.18289	0.159735	0.411117	0.325764	0.427944	0.34964	0.491346	0.412322	0.207216	0.256477	0.18139	0.388635	0.345708	0.375661	0.404149	0.397816	0.442949	0.193956	0.388275	0.417769	0.215028	0.370001	0.414971	0.0408928	0.0547859	0.0710095	0.0381479	0.0220161	0.0244358	0.0210717	0.0182738	0.00279793	0.0210717	0.549605	0.620339	0.951643	0.549605
DEK_HUMAN	S301,S303,S306,S307	0.0198095	0.156096	0.0195096	0.264214	0.264035	0.337377	0.715976	0.57987	0.643113	0.0684566	0.0556052	0.081547	0.332104	0.312997	0.269034	0.599439	0.631398	0.649419	0.0651382	0.288542	0.64632	0.0685363	0.304712	0.626752	0.0787715	0.0422927	0.06811	0.0129711	0.0323409	0.0253115	0.00339811	0.0161696	0.0195677	0.0195677	0.944768	0.62668	0.665169	0.62668
MYH9_HUMAN	S1943	0.671626	0.612386	0.635366	0.150166	0.18573	0.142417	0.178208	0.201884	0.222217	0.636804	0.675985	0.579866	0.186533	0.154295	0.19572	0.176663	0.16972	0.224413	0.639793	0.159438	0.20077	0.630885	0.178849	0.190265	0.0298669	0.0230971	0.0220256	0.0483321	0.0217553	0.0297759	0.00890774	0.0194118	0.0105041	0.0194118	0.799402	0.34905	0.648998	0.34905
NOLC1_HUMAN	S622	0.205708	0.314286	0.231727	0.415811	0.310981	0.364141	0.378481	0.374733	0.404132	0.207516	0.249093	0.246949	0.40075	0.335761	0.344508	0.391734	0.415146	0.408544	0.250573	0.363644	0.385782	0.234519	0.36034	0.405141	0.0566896	0.052417	0.0160016	0.0234101	0.0352686	0.0120711	0.0160544	0.00330484	0.0193592	0.0193592	0.673784	0.932163	0.169668	0.169668
TMX2_HUMAN	S288	0.0129858	0.0217298	0.00567991	0.961224	0.967777	0.943202	0.0257904	0.0104932	0.0511183	0.0135991	0.010094	0.00847679	0.976871	0.977331	0.974764	0.00953011	0.0125749	0.0167594	0.0134652	0.957401	0.029134	0.0107233	0.976322	0.0129548	0.00803567	0.0127258	0.0205179	0.0026185	0.00136881	0.00362959	0.00274185	0.018921	0.0161791	0.018921	0.60417	0.0626065	0.24985	0.0626065
CALX_HUMAN	S554	0.00923063	0.0116746	0.0116503	0.976973	0.973588	0.974522	0.0137968	0.0147373	0.0138275	0.00140263	0.00139585	0.0016343	0.994992	0.994066	0.99173	0.00360492	0.00453863	0.00663528	0.0108519	0.975028	0.0141205	0.00147759	0.993596	0.00492628	0.00140408	0.00174794	0.000534369	0.000135751	0.00168091	0.00155192	0.00937426	0.0185685	0.00919424	0.0185685	0.000325283	0.000186802	0.000631685	0.000186802
SF3A1_HUMAN	S329	0.193002	0.224878	0.300768	0.538172	0.461779	0.301384	0.268826	0.313343	0.397848	0.233208	0.237663	0.192209	0.465316	0.331823	0.524268	0.301476	0.430514	0.283523	0.239549	0.433778	0.326672	0.221027	0.440469	0.338504	0.0553607	0.120852	0.0655359	0.0250563	0.0985993	0.0801867	0.0185224	0.00669023	0.0118322	0.0185224	0.625467	0.944343	0.852779	0.625467
CALX_HUMAN	S564	0.00923063	0.0116746	0.0116503	0.976973	0.973588	0.974522	0.0137968	0.0147373	0.0138275	0.00201399	0.00268418	0.0028428	0.994234	0.993073	0.9925	0.00375172	0.00424261	0.00465719	0.0108519	0.975028	0.0141205	0.00251365	0.993269	0.00421717	0.00140408	0.00174794	0.000534369	0.000439934	0.000883594	0.000453272	0.0083382	0.0182415	0.00990334	0.0182415	0.000604023	8.63742e-05	1.65249e-05	1.65249e-05
NPM_HUMAN	S125	0.298186	0.31517	0.313583	0.40803	0.384023	0.409325	0.293784	0.300808	0.277092	0.309403	0.320096	0.348757	0.401825	0.386544	0.361187	0.288772	0.29336	0.290057	0.30898	0.400459	0.290561	0.326085	0.383185	0.290729	0.00938142	0.0142492	0.0121821	0.0203488	0.0205261	0.00236666	0.0171058	0.017274	0.000168229	0.017274	0.256622	0.29726	0.982392	0.256622
SPTB2_HUMAN	S2165,T2171	0.124992	0.205115	0.111013	0.21376	0.141521	0.16803	0.661248	0.653364	0.720956	0.148344	0.157543	0.15802	0.219438	0.182073	0.150225	0.632218	0.660384	0.691754	0.14704	0.174437	0.678523	0.154636	0.183912	0.661452	0.0507778	0.0365433	0.0369594	0.00545398	0.0346432	0.0297828	0.00759544	0.00947522	0.0170707	0.0170707	0.809424	0.760822	0.567095	0.567095
SRS10_HUMAN	S129,S131,S133	0.0198629	0.0183253	0.0460706	0.375851	0.281537	0.211439	0.604286	0.700137	0.74249	0.0217596	0.0105805	0.00653443	0.35876	0.277825	0.229121	0.61948	0.711595	0.764345	0.0280863	0.289609	0.682304	0.0129582	0.288569	0.698473	0.0155939	0.0825024	0.0708066	0.00788614	0.0654841	0.0733182	0.0151281	0.00104081	0.0161689	0.0161689	0.20813	0.987165	0.797109	0.20813
RCC2_HUMAN	S44,S51	0.172224	0.188672	0.174304	0.821035	0.805365	0.819321	0.00674125	0.005963	0.00637536	0.203372	0.166825	0.116505	0.783682	0.803625	0.874183	0.0129463	0.02955	0.00931203	0.1784	0.81524	0.00635987	0.162234	0.820497	0.0172694	0.00895673	0.00859529	0.000389356	0.0436151	0.0475512	0.0107894	0.0161658	0.00525621	0.0109096	0.0161658	0.563569	0.859732	0.154979	0.154979
TOP2B_HUMAN	S1522,S1524	0.0603819	0.0148618	0.0334855	0.164389	0.148083	0.491282	0.775229	0.837055	0.475233	0.0262368	0.0313836	0.0249019	0.316518	0.280474	0.254785	0.657246	0.688143	0.720313	0.0362431	0.267918	0.695839	0.0275074	0.283926	0.688567	0.022885	0.193611	0.193536	0.00342259	0.0310107	0.0315358	0.00873564	0.0160076	0.00727199	0.0160076	0.548872	0.894387	0.951866	0.548872
SC61B_HUMAN	S7	0.00652119	0.00552872	0.00459995	0.979638	0.95625	0.97596	0.0138404	0.0382215	0.0194397	0.0177427	0.0282962	0.0155476	0.973167	0.950213	0.973532	0.0090907	0.0214913	0.0109204	0.00554995	0.970616	0.0238339	0.0205288	0.965637	0.0138341	0.000960795	0.0125769	0.0127707	0.00681574	0.0133593	0.00669409	0.0149789	0.00497911	0.00999976	0.0149789	0.0196173	0.662816	0.29593	0.0196173
SPTB2_HUMAN	S2138	0.124992	0.205115	0.111013	0.21376	0.141521	0.16803	0.661248	0.653364	0.720956	0.0885028	0.227964	0.167617	0.183748	0.200929	0.125191	0.727749	0.571107	0.707192	0.14704	0.174437	0.678523	0.161361	0.169956	0.668683	0.0507778	0.0365433	0.0369594	0.0699409	0.039708	0.085126	0.014321	0.00448104	0.00983992	0.014321	0.788372	0.892594	0.863222	0.788372
HS90A_HUMAN	S252	0.694574	0.731204	0.724308	0.185987	0.143251	0.164788	0.119439	0.125545	0.110904	0.719505	0.72095	0.710338	0.17999	0.184757	0.170945	0.100505	0.0942922	0.118718	0.716695	0.164675	0.118629	0.716931	0.178564	0.104505	0.0194655	0.0213684	0.00735407	0.00575552	0.00701592	0.0126945	0.000235709	0.0138887	0.0141244	0.0141244	0.984917	0.345052	0.170733	0.170733
CALX_HUMAN	S583	0.00923063	0.0116746	0.0116503	0.976973	0.973588	0.974522	0.0137968	0.0147373	0.0138275	0.00355027	0.00430029	0.00291906	0.990618	0.987438	0.988929	0.00583167	0.0082619	0.00815149	0.0108519	0.975028	0.0141205	0.00358987	0.988995	0.00741502	0.00140408	0.00174794	0.000534369	0.000691467	0.00159114	0.00137233	0.00726198	0.0139675	0.00670549	0.0139675	0.00130111	0.000513635	0.00139786	0.000513635
HDGF_HUMAN	S132,S133	0.67821	0.803456	0.836132	0.298442	0.187536	0.156557	0.0233484	0.00900728	0.00731101	0.755051	0.795996	0.805479	0.240194	0.199237	0.182287	0.00475449	0.00476669	0.012234	0.772599	0.214178	0.0132222	0.785509	0.207239	0.00725174	0.0833606	0.0746002	0.00881046	0.0267998	0.0297716	0.00431481	0.0129095	0.00693901	0.0059705	0.0129095	0.811039	0.888296	0.35129	0.35129
GTF2I_HUMAN	T558	0.0522714	0.0445812	0.0386089	0.936219	0.931511	0.937703	0.0115095	0.0239074	0.0236876	0.13193	0.00205545	0.0401413	0.849432	0.981041	0.957579	0.0186378	0.0169034	0.00227929	0.0451538	0.935145	0.0197015	0.0580422	0.929351	0.0126069	0.00684921	0.00323283	0.00709533	0.0667621	0.0701987	0.00898588	0.0128884	0.00579373	0.00709465	0.0128884	0.756119	0.893352	0.343586	0.343586
MYOF_HUMAN	S1915	0.0196964	0.0155413	0.0218724	0.961946	0.970769	0.949614	0.0183575	0.0136897	0.0285137	0.0115986	0.0119502	0.0108668	0.977529	0.96984	0.97195	0.0108724	0.0182101	0.0171832	0.0190367	0.960776	0.020187	0.0114719	0.973106	0.0154219	0.00321668	0.0106259	0.00757941	0.000552684	0.00397286	0.00397326	0.00756477	0.0123299	0.00476509	0.0123299	0.015937	0.132893	0.389441	0.015937
TEBP_HUMAN	S113	0.741888	0.815015	0.786139	0.215318	0.14167	0.165711	0.0427944	0.0433144	0.0481498	0.792344	0.805508	0.752617	0.180624	0.162737	0.207173	0.027032	0.0317551	0.0402094	0.781014	0.174233	0.0447529	0.78349	0.183511	0.0329989	0.0368322	0.0375561	0.00295331	0.0275346	0.0223585	0.00667617	0.00247577	0.00927827	0.011754	0.011754	0.93019	0.73174	0.0493744	0.0493744
TR150_HUMAN	S928,S939	0.197341	0.0148435	0.0579702	0.583983	0.754805	0.669563	0.218675	0.230352	0.272467	0.0542579	0.217004	0.0285629	0.580521	0.565991	0.865762	0.365221	0.217004	0.105675	0.0900517	0.66945	0.240498	0.0999417	0.670758	0.2293	0.095385	0.0854108	0.0282949	0.10219	0.169034	0.130209	0.00988998	0.00130779	0.0111978	0.0111978	0.908381	0.99103	0.891312	0.891312
PSIP1_HUMAN	S273,S275	0.0449573	0.0202215	0.0245898	0.786347	0.77043	0.80442	0.168696	0.209349	0.17099	0.0315149	0.0285256	0.0500454	0.801459	0.81066	0.758746	0.167026	0.160815	0.191209	0.0299229	0.787066	0.183011	0.0366953	0.790288	0.173017	0.0132022	0.0170067	0.0228375	0.0116577	0.0277011	0.0160581	0.00677241	0.00322248	0.00999489	0.00999489	0.541846	0.872001	0.568779	0.541846
RCC1_HUMAN	S11	0.0363541	0.02775	0.0379824	0.831636	0.789239	0.770765	0.13201	0.183011	0.191253	0.0393761	0.0418226	0.0357014	0.838517	0.772976	0.790261	0.122107	0.185201	0.174037	0.0340288	0.797213	0.168758	0.0389667	0.800585	0.160449	0.00549826	0.0312091	0.0320902	0.00308107	0.0339681	0.0336707	0.0049379	0.00337151	0.0083094	0.0083094	0.246308	0.90537	0.772448	0.246308
HDGF_HUMAN	S132	0.67821	0.803456	0.836132	0.298442	0.187536	0.156557	0.0233484	0.00900728	0.00731101	0.684293	0.84741	0.806798	0.309906	0.144458	0.187314	0.00580124	0.00813145	0.00588806	0.772599	0.214178	0.0132222	0.7795	0.213893	0.00660692	0.0833606	0.0746002	0.00881046	0.0849157	0.0858663	0.001321	0.00690093	0.000285605	0.00661533	0.00690093	0.924822	0.996738	0.267795	0.267795
BASI_HUMAN	S362	0.00725519	0.0127308	0.00366319	0.983484	0.969723	0.991005	0.00926121	0.0175463	0.00533174	0.0169554	0.00549576	0.00518599	0.981251	0.989938	0.989717	0.00179341	0.00456669	0.00509705	0.00788306	0.981404	0.0107131	0.0092124	0.986969	0.00381905	0.00456629	0.0107924	0.00623536	0.00670747	0.00495265	0.00177419	0.00132934	0.00556469	0.00689403	0.00689403	0.790677	0.462514	0.13929	0.13929
PLEC_HUMAN	S1435	0.0544513	0.0652363	0.0631374	0.0685738	0.0651016	0.0585535	0.876975	0.869662	0.878309	0.058645	0.0513666	0.060031	0.0677793	0.0557382	0.0722773	0.873576	0.892895	0.867692	0.0609417	0.0640763	0.874982	0.0566809	0.0652649	0.878054	0.00571798	0.00508826	0.00465523	0.00465417	0.00855143	0.0131851	0.00426077	0.00118865	0.00307213	0.00426077	0.373483	0.846194	0.722887	0.373483
HS90A_HUMAN	S231	0.694574	0.731204	0.724308	0.185987	0.143251	0.164788	0.119439	0.125545	0.110904	0.682812	0.763852	0.699244	0.196272	0.146702	0.161103	0.120916	0.0894461	0.139654	0.716695	0.164675	0.118629	0.715303	0.168026	0.116672	0.0194655	0.0213684	0.00735407	0.0428404	0.0255002	0.0253714	0.00139244	0.0033501	0.00195765	0.0033501	0.96158	0.870015	0.904058	0.870015
